# Supplementary material for: Seasonal influenza vaccination in Kenya: an economic evaluation using dynamic transmission modelling
Source: BMC Med. 2020 Aug 20;18:223. doi: 10.1186/s12916-020-01687-7 (PMC7438179; doi:10.1186/s12916-020-01687-7)
Supplement: Supplementary file 1 — Additional file 1. Influenza surveillance data 2010–2018. [file 12916_2020_1687_MOESM1_ESM.csv]

sentinel.site	year	age.years	date.onset.illness	tested.for.influenza	test.flu.type.A	test.flu.type.B	test.any.influenza	has.flu.AH1N1.pandemic.2009	has.flu.AH3N2	final.outcome
Siaya CRH	2010	1.01	20/12/2009	Yes	Negative	Negative	Negative			Discharge alive
Kakamega CRH	2010	1.5	22/12/2009	Yes	Negative	Negative	Negative			Unknown
Siaya CRH	2010	45.56	23/12/2009	Yes	Negative	Negative	Negative			Discharge alive
Kenyatta NH	2010	0.67	24/12/2009	Yes	Negative	Negative	Negative			Unknown
Nyeri CRH	2010	1.08	26/12/2009	Yes	Negative	Negative	Negative			Unknown
Siaya CRH	2010	0.21	27/12/2009	Yes	Negative	Negative	Negative			Discharge alive
Siaya CRH	2010	4.39	27/12/2009	Yes	Negative	Negative	Negative			Discharge alive
Siaya CRH	2010	1.26	27/12/2009	Yes	Negative	Negative	Negative			Discharge alive
Kakamega CRH	2010	2.42	28/12/2009	Yes	Negative	Negative	Negative			Discharge alive
Siaya CRH	2010	0.52	29/12/2009	No	Negative	Negative				Discharge alive
Nyeri CRH	2010	0.25	29/12/2009	Yes	Negative	Negative	Negative			Discharge alive
Nyeri CRH	2010	1	29/12/2009	Yes	Negative	Negative	Negative			Discharge alive
Siaya CRH	2010	0.65	29/12/2009	Yes	Negative	Negative	Negative			Discharge alive
Siaya CRH	2010	0.59	29/12/2009	Yes	Negative	Negative	Negative			Discharge alive
Kenyatta NH	2010	0.08	30/12/2009	Yes	Negative	Negative	Negative			Unknown
Nyeri CRH	2010	1.17	30/12/2009	Yes	Negative	Negative	Negative			Discharge alive
Siaya CRH	2010	0.44	30/12/2009	Yes	Negative	Negative	Negative			Discharge alive
Siaya CRH	2010	1.25	30/12/2009	Yes	Negative	Negative	Negative			Discharge alive
Siaya CRH	2010	2.32	30/12/2009	Yes	Negative	Negative	Negative			Discharge alive
Siaya CRH	2010	1.89	30/12/2009	Yes	Negative	Negative	Negative			Discharge alive
Kakamega CRH	2010	3	31/12/2009	Yes	Negative	Negative	Negative			Discharge alive
Kenyatta NH	2010	1.5	31/12/2009	Yes	Negative	Negative	Negative			Unknown
Nakuru CRH	2010	0.83	31/12/2009	Yes	Negative	Negative	Negative			Unknown
Nyeri CRH	2010	0.75	31/12/2009	Yes	Negative	Negative	Negative			Discharge alive
Nyeri CRH	2010	0.67	31/12/2009	Yes	Negative	Negative	Negative			Discharge alive
Nyeri CRH	2010	1.42	31/12/2009	Yes	Negative	Negative	Negative			Discharge alive
Siaya CRH	2010	0.52	31/12/2009	Yes	Negative	Negative	Negative			Discharge alive
Siaya CRH	2010	1.17	31/12/2009	Yes	Negative	Negative	Negative			Died
Siaya CRH	2010	0.27	31/12/2009	Yes	Negative	Negative	Negative			Discharge alive
Siaya CRH	2010	0.59	31/12/2009	Yes	Negative	Negative	Negative			Discharge alive
Siaya CRH	2010	0.5	31/12/2009	Yes	Negative	Negative	Negative			Discharge alive
Siaya CRH	2010	2.12	31/12/2009	Yes	Positive	Negative	Positive	Yes	No	Died
Kenyatta NH	2010	1.25	01/01/2010	Yes	Negative	Negative	Negative			Unknown
Kenyatta NH	2010	1.33	01/01/2010	Yes	Negative	Negative	Negative			Unknown
Mombasa CRH	2010	1	01/01/2010	Yes	Negative	Negative	Negative			Unknown
Nyeri CRH	2010	0.83	01/01/2010	Yes	Negative	Negative	Negative			Discharge alive
Siaya CRH	2010	0.37	01/01/2010	Yes	Negative	Negative	Negative			Discharge alive
Siaya CRH	2010	1.89	01/01/2010	Yes	Negative	Negative	Negative			Discharge alive
Siaya CRH	2010	1.73	01/01/2010	Yes	Negative	Negative	Negative			Discharge alive
Siaya CRH	2010	0.16	01/01/2010	Yes	Negative	Negative	Negative			Discharge alive
Siaya CRH	2010	0.52	01/01/2010	Yes	Negative	Negative	Negative			Discharge alive
Siaya CRH	2010	1	02/01/2010	No	Negative	Negative				Unknown
Kenyatta NH	2010	0.25	02/01/2010	Yes	Negative	Negative	Negative			Unknown
Mombasa CRH	2010	0.42	02/01/2010	Yes	Negative	Negative	Negative			Unknown
Mombasa CRH	2010	0.5	02/01/2010	Yes	Negative	Negative	Negative			Unknown
Mombasa CRH	2010	0.75	02/01/2010	Yes	Negative	Negative	Negative			Unknown
Mombasa CRH	2010	0.33	02/01/2010	Yes	Negative	Negative	Negative			Unknown
Nakuru CRH	2010	1.17	02/01/2010	Yes	Negative	Negative	Negative			Discharge alive
Nyeri CRH	2010	1.83	02/01/2010	Yes	Negative	Negative	Negative			Discharge alive
Nyeri CRH	2010	1.08	02/01/2010	Yes	Negative	Negative	Negative			Discharge alive
Siaya CRH	2010	1.23	02/01/2010	Yes	Negative	Negative	Negative			Discharge alive
Siaya CRH	2010	1.48	02/01/2010	Yes	Negative	Negative	Negative			Discharge alive
Siaya CRH	2010	5.56	02/01/2010	Yes	Negative	Negative	Negative			Unknown
Siaya CRH	2010	0.99	03/01/2010	No	Negative	Negative				Discharge alive
Nyeri CRH	2010	0.58	03/01/2010	Yes	Negative	Negative	Negative			Discharge alive
Siaya CRH	2010	2.2	03/01/2010	Yes	Negative	Negative	Negative			Unknown
Siaya CRH	2010	0.19	03/01/2010	Yes	Negative	Negative	Negative			Discharge alive
Siaya CRH	2010	0.57	03/01/2010	Yes	Negative	Negative	Negative			Discharge alive
Kakamega CRH	2010	3.5	04/01/2010	Yes	Negative	Negative	Negative			Unknown
Nakuru CRH	2010	2	04/01/2010	Yes	Negative	Negative	Negative			Discharge alive
Nakuru CRH	2010	1	04/01/2010	Yes	Negative	Negative	Negative			Unknown
Nakuru CRH	2010	0.75	04/01/2010	Yes	Negative	Negative	Negative			Discharge alive
Nakuru CRH	2010	0.42	04/01/2010	Yes	Negative	Negative	Negative			Discharge alive
Nyeri CRH	2010	2	04/01/2010	Yes	Negative	Negative	Negative			Discharge alive
Siaya CRH	2010	3.56	04/01/2010	Yes	Negative	Negative	Negative			Discharge alive
Siaya CRH	2010	2.73	04/01/2010	Yes	Negative	Negative	Negative			Discharge alive
Siaya CRH	2010	0.4	04/01/2010	Yes	Negative	Negative	Negative			Discharge alive
Siaya CRH	2010	0.86	04/01/2010	Yes	Negative	Negative	Negative			Died
Siaya CRH	2010	5.6	04/01/2010	Yes	Negative	Negative	Negative			Discharge alive
Siaya CRH	2010	1.16	04/01/2010	Yes	Negative	Negative	Negative			Discharge alive
Siaya CRH	2010	0.47	04/01/2010	Yes	Negative	Negative	Negative			Discharge alive
Siaya CRH	2010	10.24	04/01/2010	Yes	Negative	Negative	Negative			Died
Siaya CRH	2010	0.55	05/01/2010	No	Negative	Negative				Discharge alive
Kenyatta NH	2010	0.08	05/01/2010	Yes	Negative	Negative	Negative			Unknown
Kenyatta NH	2010	0.67	05/01/2010	Yes	Negative	Negative	Negative			Unknown
Kenyatta NH	2010	0.67	05/01/2010	Yes	Negative	Negative	Negative			Unknown
Nakuru CRH	2010	2	05/01/2010	Yes	Negative	Negative	Negative			Discharge alive
Nakuru CRH	2010	1	05/01/2010	Yes	Negative	Negative	Negative			Unknown
Nakuru CRH	2010	0.5	05/01/2010	Yes	Negative	Negative	Negative			Discharge alive
Nakuru CRH	2010	0.5	05/01/2010	Yes	Negative	Negative	Negative			Discharge alive
Nyeri CRH	2010	1	05/01/2010	Yes	Negative	Negative	Negative			Discharge alive
Nyeri CRH	2010	0.67	05/01/2010	Yes	Negative	Negative	Negative			Discharge alive
Nyeri CRH	2010	1.42	05/01/2010	Yes	Negative	Negative	Negative			Discharge alive
Siaya CRH	2010	3.07	06/01/2010	No	Negative	Negative				Discharge alive
Kenyatta NH	2010	0.5	06/01/2010	Yes	Negative	Negative	Negative			Unknown
Kenyatta NH	2010	11	06/01/2010	Yes	Negative	Negative	Negative			Unknown
Mombasa CRH	2010	1.25	06/01/2010	Yes	Negative	Negative	Negative			Unknown
Mombasa CRH	2010	0.25	06/01/2010	Yes	Negative	Negative	Negative			Unknown
Nyeri CRH	2010	0.33	06/01/2010	Yes	Negative	Negative	Negative			Discharge alive
Siaya CRH	2010	0.5	06/01/2010	Yes	Negative	Negative	Negative			Unknown
Siaya CRH	2010	0.08	06/01/2010	Yes	Negative	Negative	Negative			Discharge alive
Siaya CRH	2010	1.57	06/01/2010	Yes	Negative	Negative	Negative			Discharge alive
Kenyatta NH	2010	1.17	07/01/2010	Yes	Negative	Negative	Negative			Unknown
Kenyatta NH	2010	0.58	07/01/2010	Yes	Negative	Negative	Negative			Unknown
Nakuru CRH	2010	1	07/01/2010	Yes	Negative	Negative	Negative			Unknown
Nyeri CRH	2010	1	07/01/2010	Yes	Negative	Negative	Negative			Discharge alive
Nyeri CRH	2010	1	07/01/2010	Yes	Negative	Negative	Negative			Discharge alive
Nyeri CRH	2010	1.5	07/01/2010	Yes	Negative	Negative	Negative			Discharge alive
Siaya CRH	2010	10.57	07/01/2010	Yes	Negative	Negative	Negative			Discharge alive
Kakamega CRH	2010	3	08/01/2010	Yes	Negative	Negative	Negative			Discharge alive
Kenyatta NH	2010	0.83	08/01/2010	Yes	Negative	Negative	Negative			Unknown
Kenyatta NH	2010	0.08	08/01/2010	Yes	Negative	Negative	Negative			Unknown
Nakuru CRH	2010	4	08/01/2010	Yes	Negative	Negative	Negative			Discharge alive
Nyeri CRH	2010	0.75	08/01/2010	Yes	Negative	Negative	Negative			Discharge alive
Nyeri CRH	2010	1	08/01/2010	Yes	Negative	Negative	Negative			Unknown
Siaya CRH	2010	0.55	08/01/2010	Yes	Negative	Negative	Negative			Discharge alive
Siaya CRH	2010	0.94	08/01/2010	Yes	Negative	Negative	Negative			Discharge alive
Siaya CRH	2010	4.58	08/01/2010	Yes	Negative	Negative	Negative			Discharge alive
Siaya CRH	2010	0.48	08/01/2010	Yes	Negative	Negative	Negative			Discharge alive
Kakamega CRH	2010	5.67	09/01/2010	Yes	Negative	Positive	Positive			Discharge alive
Mombasa CRH	2010	0.67	09/01/2010	Yes	Negative	Negative	Negative			Unknown
Mombasa CRH	2010	12	09/01/2010	Yes	Negative	Negative	Negative			Unknown
Mombasa CRH	2010	0.17	09/01/2010	Yes	Negative	Negative	Negative			Unknown
Nakuru CRH	2010	0.42	09/01/2010	Yes	Negative	Negative	Negative			Unknown
Siaya CRH	2010	25.6	09/01/2010	Yes	Negative	Negative	Negative			Discharge alive
Siaya CRH	2010	1.05	09/01/2010	Yes	Negative	Negative	Negative			Discharge alive
Siaya CRH	2010	5.78	09/01/2010	Yes	Negative	Negative	Negative			Discharge alive
Siaya CRH	2010	3.23	09/01/2010	Yes	Negative	Negative	Negative			Discharge alive
Siaya CRH	2010	2.73	09/01/2010	Yes	Negative	Negative	Negative			Discharge alive
Siaya CRH	2010	1.1	09/01/2010	Yes	Negative	Negative	Negative			Discharge alive
Siaya CRH	2010	0.39	09/01/2010	Yes	Negative	Negative	Negative			Discharge alive
Kenyatta NH	2010	0.75	10/01/2010	Yes	Negative	Negative	Negative			Unknown
Nakuru CRH	2010	0.25	10/01/2010	Yes	Negative	Negative	Negative			Unknown
Nakuru CRH	2010	0.42	10/01/2010	Yes	Negative	Negative	Negative			Discharge alive
Nakuru CRH	2010	0.42	10/01/2010	Yes	Negative	Negative	Negative			Died
Nyeri CRH	2010	0.33	10/01/2010	Yes	Negative	Negative	Negative			Discharge alive
Siaya CRH	2010	50.58	10/01/2010	Yes	Negative	Negative	Negative			Discharge alive
Siaya CRH	2010	1.23	10/01/2010	Yes	Negative	Negative	Negative			Discharge alive
Siaya CRH	2010	2.84	10/01/2010	Yes	Negative	Negative	Negative			Discharge alive
Siaya CRH	2010	1.1	10/01/2010	Yes	Negative	Negative	Negative			Discharge alive
Siaya CRH	2010	2.47	11/01/2010	No	Negative	Negative				Discharge alive
Siaya CRH	2010	3.81	11/01/2010	No	Negative	Negative				Discharge alive
Nakuru CRH	2010	1	11/01/2010	No						Discharge alive
Kakamega CRH	2010	4.5	11/01/2010	Yes	Negative	Negative	Negative			Discharge alive
Kenyatta NH	2010	3	11/01/2010	Yes	Negative	Negative	Negative			Unknown
Mombasa CRH	2010	0.92	11/01/2010	Yes	Negative	Negative	Negative			Unknown
Siaya CRH	2010	0.85	11/01/2010	Yes	Negative	Negative	Negative			Discharge alive
Siaya CRH	2010	0.62	11/01/2010	Yes	Negative	Negative	Negative			Discharge alive
Siaya CRH	2010	0.19	11/01/2010	Yes	Negative	Negative	Negative			Discharge alive
Siaya CRH	2010	3.19	11/01/2010	Yes	Negative	Negative	Negative			Discharge alive
Siaya CRH	2010	0.55	11/01/2010	Yes	Negative	Negative	Negative			Discharge alive
Siaya CRH	2010	1.21	11/01/2010	Yes	Negative	Negative	Negative			Discharge alive
Nakuru CRH	2010	1	12/01/2010	Yes	Negative	Negative	Negative			Discharge alive
Nakuru CRH	2010	2	12/01/2010	Yes	Negative	Negative	Negative			Unknown
Nyeri CRH	2010	1.67	12/01/2010	Yes	Negative	Negative	Negative			Discharge alive
Nyeri CRH	2010	0.33	12/01/2010	Yes	Negative	Negative	Negative			Discharge alive
Siaya CRH	2010	18.61	12/01/2010	Yes	Negative	Negative	Negative			Discharge alive
Siaya CRH	2010	20.59	12/01/2010	Yes	Negative	Negative	Negative			Discharge alive
Siaya CRH	2010	0.59	12/01/2010	Yes	Negative	Negative	Negative			Discharge alive
Siaya CRH	2010	0.68	12/01/2010	Yes	Negative	Negative	Negative			Died
Siaya CRH	2010	0.54	12/01/2010	Yes	Negative	Negative	Negative			Discharge alive
Siaya CRH	2010	0.28	12/01/2010	Yes	Negative	Negative	Negative			Discharge alive
Siaya CRH	2010	1.4	13/01/2010	No	Negative	Negative				Discharge alive
Siaya CRH	2010	0.26	13/01/2010	No	Negative	Negative				Died
Kakamega CRH	2010	0.5	13/01/2010	Yes	Negative	Negative	Negative			Unknown
Kenyatta NH	2010	1.5	13/01/2010	Yes	Negative	Negative	Negative			Unknown
Kenyatta NH	2010	0.92	13/01/2010	Yes	Negative	Negative	Negative			Unknown
Nakuru CRH	2010	0.25	13/01/2010	Yes	Negative	Negative	Negative			Discharge alive
Nyeri CRH	2010	1.25	13/01/2010	Yes	Negative	Negative	Negative			Discharge alive
Siaya CRH	2010	4.75	13/01/2010	Yes	Negative	Negative	Negative			Unknown
Siaya CRH	2010	3.11	13/01/2010	Yes	Negative	Negative	Negative			Discharge alive
Siaya CRH	2010	0.73	13/01/2010	Yes	Negative	Negative	Negative			Discharge alive
Siaya CRH	2010	0.25	13/01/2010	Yes	Negative	Negative	Negative			Discharge alive
Siaya CRH	2010	1.32	13/01/2010	Yes	Negative	Negative	Negative			Discharge alive
Siaya CRH	2010	1.11	14/01/2010	No	Negative	Negative				Discharge alive
Kenyatta NH	2010	1	14/01/2010	Yes	Negative	Negative	Negative			Unknown
Kenyatta NH	2010	1.5	14/01/2010	Yes	Negative	Negative	Negative			Unknown
Siaya CRH	2010	1.68	14/01/2010	Yes	Negative	Negative	Negative			Discharge alive
Siaya CRH	2010	0.92	14/01/2010	Yes	Negative	Negative	Negative			Discharge alive
Siaya CRH	2010	1.64	14/01/2010	Yes	Negative	Negative	Negative			Discharge alive
Siaya CRH	2010	0.45	14/01/2010	Yes	Negative	Negative	Negative			Discharge alive
Siaya CRH	2010	0.81	15/01/2010	No	Negative	Negative				Died
Kenyatta NH	2010	0.67	15/01/2010	No						Unknown
Nakuru CRH	2010	1.42	15/01/2010	No						Discharge alive
Kakamega CRH	2010	3.5	15/01/2010	Yes	Negative	Negative	Negative			Discharge alive
Nakuru CRH	2010	1	15/01/2010	Yes	Negative	Negative	Negative			Unknown
Nakuru CRH	2010	1.17	15/01/2010	Yes	Negative	Negative	Negative			Discharge alive
Nakuru CRH	2010	0.42	15/01/2010	Yes	Negative	Negative	Negative			Discharge alive
Nyeri CRH	2010	0.75	15/01/2010	Yes	Negative	Negative	Negative			Discharge alive
Nyeri CRH	2010	4	15/01/2010	Yes	Negative	Negative	Negative			Discharge alive
Nyeri CRH	2010	10	15/01/2010	Yes	Negative	Negative	Negative			Discharge alive
Siaya CRH	2010	57.6	15/01/2010	Yes	Negative	Negative	Negative			Discharge alive
Siaya CRH	2010	70.6	15/01/2010	Yes	Negative	Negative	Negative			Discharge alive
Siaya CRH	2010	0.92	15/01/2010	Yes	Negative	Negative	Negative			Discharge alive
Siaya CRH	2010	0.46	15/01/2010	Yes	Negative	Negative	Negative			Discharge alive
Siaya CRH	2010	4.52	15/01/2010	Yes	Negative	Negative	Negative			Discharge alive
Siaya CRH	2010	2.59	15/01/2010	Yes	Negative	Negative	Negative			Discharge alive
Siaya CRH	2010	0.33	15/01/2010	Yes	Negative	Negative	Negative			Discharge alive
Siaya CRH	2010	0.49	15/01/2010	Yes	Negative	Negative	Negative			Discharge alive
Kenyatta NH	2010	0.08	16/01/2010	No						Unknown
Nakuru CRH	2010	0.33	16/01/2010	No						Unknown
Nakuru CRH	2010	1.75	16/01/2010	No						Discharge alive
Kenyatta NH	2010	0.42	16/01/2010	Yes	Negative	Negative	Negative			Unknown
Nakuru CRH	2010	1	16/01/2010	Yes	Negative	Negative	Negative			Discharge alive
Nyeri CRH	2010	3.5	16/01/2010	Yes	Negative	Negative	Negative			Discharge alive
Nyeri CRH	2010	0	16/01/2010	Yes	Negative	Negative	Negative			Discharge alive
Siaya CRH	2010	0.48	16/01/2010	Yes	Negative	Negative	Negative			Discharge alive
Siaya CRH	2010	1.26	16/01/2010	Yes	Negative	Negative	Negative			Discharge alive
Siaya CRH	2010	0.84	16/01/2010	Yes	Negative	Negative	Negative			Discharge alive
Siaya CRH	2010	11.3	16/01/2010	Yes	Negative	Negative	Negative			Discharge alive
Siaya CRH	2010	1.57	16/01/2010	Yes	Negative	Negative	Negative			Discharge alive
Siaya CRH	2010	0.43	16/01/2010	Yes	Negative	Negative	Negative			Discharge alive
Siaya CRH	2010	0.65	16/01/2010	Yes	Negative	Negative	Negative			Discharge alive
Siaya CRH	2010	0.3	16/01/2010	Yes	Negative	Negative	Negative			Discharge alive
Nakuru CRH	2010	0.58	17/01/2010	Yes	Negative	Negative	Negative			Discharge alive
Nyeri CRH	2010	1.58	17/01/2010	Yes	Negative	Negative	Negative			Discharge alive
Siaya CRH	2010	52.59	17/01/2010	Yes	Negative	Negative	Negative			Discharge alive
Siaya CRH	2010	0.07	17/01/2010	Yes	Negative	Negative	Negative			Discharge alive
Siaya CRH	2010	0.25	17/01/2010	Yes	Negative	Negative	Negative			Discharge alive
Siaya CRH	2010	0.37	17/01/2010	Yes	Negative	Negative	Negative			Unknown
Siaya CRH	2010	0.57	17/01/2010	Yes	Negative	Negative	Negative			Discharge alive
Siaya CRH	2010	2.53	17/01/2010	Yes	Negative	Negative	Negative			Discharge alive
Siaya CRH	2010	5.23	17/01/2010	Yes	Negative	Negative	Negative			Discharge alive
Nakuru CRH	2010	3	18/01/2010	No						Discharge alive
Nakuru CRH	2010	0.92	18/01/2010	No						Unknown
Kakamega CRH	2010	2.08	18/01/2010	Yes	Negative	Negative	Negative			Discharge alive
Kenyatta NH	2010	0.67	18/01/2010	Yes	Negative	Negative	Negative			Unknown
Kenyatta NH	2010	0.58	18/01/2010	Yes	Negative	Negative	Negative			Unknown
Kenyatta NH	2010	0.42	18/01/2010	Yes	Negative	Negative	Negative			Unknown
Kenyatta NH	2010	0.25	18/01/2010	Yes	Negative	Negative	Negative			Unknown
Kenyatta NH	2010	0.5	18/01/2010	Yes	Negative	Negative	Negative			Unknown
Mombasa CRH	2010	1	18/01/2010	Yes	Negative	Negative	Negative			Unknown
Mombasa CRH	2010	0.33	18/01/2010	Yes	Negative	Negative	Negative			Unknown
Mombasa CRH	2010	0.58	18/01/2010	Yes	Negative	Negative	Negative			Unknown
Mombasa CRH	2010	3	18/01/2010	Yes	Negative	Negative	Negative			Unknown
Nyeri CRH	2010	0.92	18/01/2010	Yes	Negative	Negative	Negative			Discharge alive
Nyeri CRH	2010	1.17	18/01/2010	Yes	Negative	Negative	Negative			Discharge alive
Siaya CRH	2010	1.18	18/01/2010	Yes	Negative	Negative	Negative			Discharge alive
Siaya CRH	2010	3.21	18/01/2010	Yes	Negative	Negative	Negative			Discharge alive
Siaya CRH	2010	1.3	18/01/2010	Yes	Negative	Negative	Negative			Discharge alive
Siaya CRH	2010	0.96	18/01/2010	Yes	Negative	Negative	Negative			Discharge alive
Siaya CRH	2010	1.19	18/01/2010	Yes	Negative	Negative	Negative			Discharge alive
Siaya CRH	2010	0.27	18/01/2010	Yes	Negative	Negative	Negative			Discharge alive
Kenyatta NH	2010	0.5	19/01/2010	Yes	Negative	Negative	Negative			Unknown
Kenyatta NH	2010	1	19/01/2010	Yes	Negative	Negative	Negative			Unknown
Mombasa CRH	2010	1.25	19/01/2010	Yes	Negative	Negative	Negative			Unknown
Nakuru CRH	2010	0.33	19/01/2010	Yes	Negative	Negative	Negative			Discharge alive
Nyeri CRH	2010	1.5	19/01/2010	Yes	Negative	Negative	Negative			Discharge alive
Siaya CRH	2010	55.61	19/01/2010	Yes	Negative	Negative	Negative			Discharge alive
Siaya CRH	2010	0.59	19/01/2010	Yes	Negative	Negative	Negative			Discharge alive
Siaya CRH	2010	1.43	19/01/2010	Yes	Negative	Negative	Negative			Discharge alive
Siaya CRH	2010	5.62	19/01/2010	Yes	Negative	Negative	Negative			Discharge alive
Siaya CRH	2010	1.24	19/01/2010	Yes	Negative	Negative	Negative			Discharge alive
Siaya CRH	2010	0.24	19/01/2010	Yes	Negative	Negative	Negative			Discharge alive
Siaya CRH	2010	23.62	20/01/2010	No	Negative	Negative				Discharge alive
Kenyatta NH	2010	1.5	20/01/2010	Yes	Negative	Negative	Negative			Unknown
Kenyatta NH	2010	0.25	20/01/2010	Yes	Negative	Negative	Negative			Unknown
Kenyatta NH	2010	0.25	20/01/2010	Yes	Negative	Negative	Negative			Unknown
Nakuru CRH	2010	0.25	20/01/2010	Yes	Negative	Negative	Negative			Unknown
Nakuru CRH	2010	0.83	20/01/2010	Yes	Negative	Negative	Negative			Discharge alive
Nakuru CRH	2010	2	20/01/2010	Yes	Negative	Negative	Negative			Discharge alive
Siaya CRH	2010	39.62	20/01/2010	Yes	Negative	Negative	Negative			Discharge alive
Siaya CRH	2010	10.6	20/01/2010	Yes	Negative	Negative	Negative			Discharge alive
Siaya CRH	2010	0.14	20/01/2010	Yes	Negative	Negative	Negative			Discharge alive
Siaya CRH	2010	2.78	20/01/2010	Yes	Negative	Negative	Negative			Discharge alive
Nakuru CRH	2010	0.33	21/01/2010	No						Discharge alive
Kenyatta NH	2010	0.33	21/01/2010	Yes	Negative	Negative	Negative			Unknown
Kenyatta NH	2010	0.42	21/01/2010	Yes	Negative	Negative	Negative			Unknown
Kenyatta NH	2010	1	21/01/2010	Yes	Negative	Negative	Negative			Unknown
Mombasa CRH	2010	1	21/01/2010	Yes	Negative	Negative	Negative			Unknown
Nakuru CRH	2010	0.67	21/01/2010	Yes	Negative	Negative	Negative			Discharge alive
Nyeri CRH	2010	5	21/01/2010	Yes	Negative	Negative	Negative			Unknown
Siaya CRH	2010	8.61	21/01/2010	Yes	Negative	Negative	Negative			Discharge alive
Siaya CRH	2010	0.55	21/01/2010	Yes	Negative	Negative	Negative			Discharge alive
Siaya CRH	2010	10.98	21/01/2010	Yes	Negative	Negative	Negative			Died
Siaya CRH	2010	5.55	21/01/2010	Yes	Negative	Negative	Negative			Discharge alive
Siaya CRH	2010	0.84	21/01/2010	Yes	Negative	Negative	Negative			Discharge alive
Siaya CRH	2010	0.79	22/01/2010	No	Negative	Negative				Discharge alive
Kakamega CRH	2010	2	22/01/2010	Yes	Negative	Negative	Negative			Discharge alive
Kenyatta NH	2010	0.25	22/01/2010	Yes	Negative	Negative	Negative			Unknown
Kenyatta NH	2010	0.17	22/01/2010	Yes	Negative	Negative	Negative			Unknown
Kenyatta NH	2010	1	22/01/2010	Yes	Negative	Negative	Negative			Unknown
Kenyatta NH	2010	0.25	22/01/2010	Yes	Negative	Negative	Negative			Unknown
Mombasa CRH	2010	0.25	22/01/2010	Yes	Negative	Negative	Negative			Unknown
Mombasa CRH	2010	0.58	22/01/2010	Yes	Negative	Negative	Negative			Unknown
Nakuru CRH	2010	1	22/01/2010	Yes	Negative	Negative	Negative			Discharge alive
Nakuru CRH	2010	0.92	22/01/2010	Yes	Negative	Positive	Positive			Unknown
Nyeri CRH	2010	3.5	22/01/2010	Yes	Negative	Negative	Negative			Discharge alive
Nyeri CRH	2010	3	22/01/2010	Yes	Negative	Negative	Negative			Discharge alive
Nyeri CRH	2010	0.92	22/01/2010	Yes	Negative	Negative	Negative			Discharge alive
Siaya CRH	2010	6.79	22/01/2010	Yes	Negative	Negative	Negative			Discharge alive
Siaya CRH	2010	0.49	22/01/2010	Yes	Negative	Negative	Negative			Discharge alive
Siaya CRH	2010	0.82	22/01/2010	Yes	Negative	Negative	Negative			Discharge alive
Siaya CRH	2010	1.56	23/01/2010	No	Negative	Negative				Discharge alive
Kakamega CRH	2010	2.5	23/01/2010	Yes	Negative	Negative	Negative			Discharge alive
Kakamega CRH	2010	0.75	23/01/2010	Yes	Negative	Negative	Negative			Discharge alive
Mombasa CRH	2010	1.58	23/01/2010	Yes	Negative	Negative	Negative			Unknown
Mombasa CRH	2010	1.42	23/01/2010	Yes	Negative	Negative	Negative			Unknown
Mombasa CRH	2010	0.08	23/01/2010	Yes	Negative	Negative	Negative			Unknown
Nyeri CRH	2010	21	23/01/2010	Yes	Negative	Negative	Negative			Unknown
Nyeri CRH	2010	0.25	23/01/2010	Yes	Negative	Negative	Negative			Discharge alive
Nyeri CRH	2010	1.67	23/01/2010	Yes	Negative	Negative	Negative			Discharge alive
Nyeri CRH	2010	1.5	23/01/2010	Yes	Negative	Negative	Negative			Discharge alive
Nyeri CRH	2010	1	23/01/2010	Yes	Negative	Negative	Negative			Discharge alive
Siaya CRH	2010	12.69	23/01/2010	Yes	Negative	Negative	Negative			Discharge alive
Siaya CRH	2010	0.46	23/01/2010	Yes	Negative	Negative	Negative			Discharge alive
Siaya CRH	2010	2.76	23/01/2010	Yes	Negative	Negative	Negative			Discharge alive
Siaya CRH	2010	0.76	23/01/2010	Yes	Negative	Negative	Negative			Discharge alive
Siaya CRH	2010	2.03	23/01/2010	Yes	Negative	Negative	Negative			Discharge alive
Siaya CRH	2010	0.37	23/01/2010	Yes	Negative	Negative	Negative			Discharge alive
Siaya CRH	2010	6.86	23/01/2010	Yes	Negative	Negative	Negative			Discharge alive
Siaya CRH	2010	3.52	23/01/2010	Yes	Negative	Negative	Negative			Discharge alive
Siaya CRH	2010	0.94	23/01/2010	Yes	Negative	Negative	Negative			Discharge alive
Kenyatta NH	2010	1.25	24/01/2010	Yes	Negative	Negative	Negative			Unknown
Mombasa CRH	2010	1.5	24/01/2010	Yes	Negative	Negative	Negative			Unknown
Mombasa CRH	2010	0.25	24/01/2010	Yes	Negative	Negative	Negative			Unknown
Nakuru CRH	2010	1	24/01/2010	Yes	Negative	Negative	Negative			Discharge alive
Nyeri CRH	2010	2.67	24/01/2010	Yes	Negative	Negative	Negative			Discharge alive
Nyeri CRH	2010	0.75	24/01/2010	Yes	Negative	Negative	Negative			Discharge alive
Nyeri CRH	2010	1.75	24/01/2010	Yes	Negative	Negative	Negative			Discharge alive
Nyeri CRH	2010	0.25	24/01/2010	Yes	Negative	Negative	Negative			Discharge alive
Siaya CRH	2010	16.62	24/01/2010	Yes	Negative	Negative	Negative			Discharge alive
Siaya CRH	2010	2.76	24/01/2010	Yes	Negative	Negative	Negative			Discharge alive
Siaya CRH	2010	1.53	24/01/2010	Yes	Negative	Negative	Negative			Discharge alive
Siaya CRH	2010	1.51	24/01/2010	Yes	Negative	Negative	Negative			Discharge alive
Siaya CRH	2010	3.23	24/01/2010	Yes	Negative	Negative	Negative			Discharge alive
Siaya CRH	2010	4.41	24/01/2010	Yes	Negative	Positive	Positive			Discharge alive
Siaya CRH	2010	2.77	25/01/2010	No	Negative	Negative				Discharge alive
Kenyatta NH	2010	0.67	25/01/2010	Yes	Negative	Negative	Negative			Unknown
Mombasa CRH	2010	1	25/01/2010	Yes	Negative	Negative	Negative			Unknown
Mombasa CRH	2010	3	25/01/2010	Yes	Negative	Negative	Negative			Unknown
Mombasa CRH	2010	0.58	25/01/2010	Yes	Negative	Negative	Negative			Unknown
Nyeri CRH	2010	0.17	25/01/2010	Yes	Negative	Negative	Negative			Discharge alive
Siaya CRH	2010	17.65	25/01/2010	Yes	Negative	Negative	Negative			Discharge alive
Siaya CRH	2010	35.62	25/01/2010	Yes	Negative	Negative	Negative			Discharge alive
Siaya CRH	2010	1.13	25/01/2010	Yes	Negative	Negative	Negative			Died
Siaya CRH	2010	4.65	25/01/2010	Yes	Negative	Negative	Negative			Discharge alive
Siaya CRH	2010	1.45	25/01/2010	Yes	Negative	Negative	Negative			Discharge alive
Siaya CRH	2010	0.25	25/01/2010	Yes	Negative	Negative	Negative			Discharge alive
Kenyatta NH	2010	0.42	26/01/2010	Yes	Negative	Negative	Negative			Unknown
Kenyatta NH	2010	0.5	26/01/2010	Yes	Negative	Negative	Negative			Unknown
Nakuru CRH	2010	0.25	26/01/2010	Yes	Negative	Negative	Negative			Unknown
Nyeri CRH	2010	0.92	26/01/2010	Yes	Negative	Negative	Negative			Discharge alive
Nyeri CRH	2010	1.08	26/01/2010	Yes	Negative	Negative	Negative			Discharge alive
Nyeri CRH	2010	2.08	26/01/2010	Yes	Negative	Negative	Negative			Discharge alive
Siaya CRH	2010	0.24	26/01/2010	Yes	Negative	Negative	Negative			Discharge alive
Siaya CRH	2010	3.55	26/01/2010	Yes	Negative	Negative	Negative			Discharge alive
Siaya CRH	2010	1.12	26/01/2010	Yes	Negative	Negative	Negative			Discharge alive
Siaya CRH	2010	3.03	26/01/2010	Yes	Negative	Negative	Negative			Discharge alive
Siaya CRH	2010	0.43	26/01/2010	Yes	Negative	Negative	Negative			Discharge alive
Siaya CRH	2010	0.24	26/01/2010	Yes	Negative	Negative	Negative			Discharge alive
Kakamega CRH	2010	1	27/01/2010	Yes	Negative	Negative	Negative			Discharge alive
Nakuru CRH	2010	1	27/01/2010	Yes	Negative	Negative	Negative			Discharge alive
Nyeri CRH	2010	1.33	27/01/2010	Yes	Negative	Negative	Negative			Discharge alive
Siaya CRH	2010	0.49	27/01/2010	Yes	Negative	Negative	Negative			Discharge alive
Siaya CRH	2010	0.36	27/01/2010	Yes	Negative	Negative	Negative			Discharge alive
Siaya CRH	2010	1.89	27/01/2010	Yes	Negative	Negative	Negative			Discharge alive
Siaya CRH	2010	2.1	27/01/2010	Yes	Negative	Negative	Negative			Discharge alive
Siaya CRH	2010	1.12	27/01/2010	Yes	Negative	Negative	Negative			Discharge alive
Siaya CRH	2010	0.14	27/01/2010	Yes	Negative	Negative	Negative			Discharge alive
Siaya CRH	2010	4.31	27/01/2010	Yes	Negative	Negative	Negative			Discharge alive
Siaya CRH	2010	2.51	27/01/2010	Yes	Negative	Negative	Negative			Discharge alive
Kakamega CRH	2010	3	28/01/2010	Yes	Negative	Negative	Negative			Discharge alive
Kenyatta NH	2010	0.58	28/01/2010	Yes	Negative	Negative	Negative			Unknown
Kenyatta NH	2010	0.92	28/01/2010	Yes	Negative	Negative	Negative			Unknown
Nyeri CRH	2010	2.25	28/01/2010	Yes	Negative	Negative	Negative			Discharge alive
Nyeri CRH	2010	2.33	28/01/2010	Yes	Negative	Negative	Negative			Discharge alive
Siaya CRH	2010	3.47	28/01/2010	Yes	Negative	Negative	Negative			Discharge alive
Siaya CRH	2010	1.01	28/01/2010	Yes	Negative	Negative	Negative			Discharge alive
Siaya CRH	2010	0.38	28/01/2010	Yes	Negative	Negative	Negative			Discharge alive
Siaya CRH	2010	0.38	28/01/2010	Yes	Negative	Negative	Negative			Discharge alive
Siaya CRH	2010	1.37	28/01/2010	Yes	Negative	Negative	Negative			Discharge alive
Siaya CRH	2010	1	28/01/2010	Yes	Negative	Negative	Negative			Discharge alive
Siaya CRH	2010	0.06	28/01/2010	Yes	Negative	Negative	Negative			Discharge alive
Siaya CRH	2010	0.17	28/01/2010	Yes	Negative	Negative	Negative			Discharge alive
Siaya CRH	2010	4.05	28/01/2010	Yes	Negative	Negative	Negative			Discharge alive
Siaya CRH	2010	1.36	29/01/2010	No	Negative	Negative				Died
Siaya CRH	2010	1.7	29/01/2010	No	Negative	Negative				Discharge alive
Siaya CRH	2010	3.97	29/01/2010	No	Negative	Negative				Discharge alive
Kakamega CRH	2010	6	29/01/2010	Yes	Negative	Negative	Negative			Unknown
Kenyatta NH	2010	1.5	29/01/2010	Yes	Negative	Negative	Negative			Unknown
Mombasa CRH	2010	4	29/01/2010	Yes	Negative	Negative	Negative			Unknown
Nakuru CRH	2010	1.5	29/01/2010	Yes	Negative	Negative	Negative			Unknown
Nakuru CRH	2010	0.42	29/01/2010	Yes	Negative	Negative	Negative			Unknown
Nakuru CRH	2010	1	29/01/2010	Yes	Negative	Negative	Negative			Unknown
Nyeri CRH	2010	0.92	29/01/2010	Yes	Negative	Negative	Negative			Discharge alive
Nyeri CRH	2010	0.5	29/01/2010	Yes	Negative	Negative	Negative			Discharge alive
Nyeri CRH	2010	1.17	29/01/2010	Yes	Negative	Negative	Negative			Discharge alive
Nyeri CRH	2010	7	29/01/2010	Yes	Negative	Negative	Negative			Discharge alive
Nyeri CRH	2010	0.5	29/01/2010	Yes	Negative	Negative	Negative			Discharge alive
Siaya CRH	2010	31.64	29/01/2010	Yes	Negative	Negative	Negative			Discharge alive
Siaya CRH	2010	55.09	29/01/2010	Yes	Negative	Negative	Negative			Discharge alive
Siaya CRH	2010	2.08	29/01/2010	Yes	Negative	Negative	Negative			Discharge alive
Siaya CRH	2010	1.89	29/01/2010	Yes	Positive	Negative	Positive	Yes	No	Discharge alive
Kakamega CRH	2010	2	30/01/2010	Yes	Negative	Negative	Negative			Discharge alive
Kakamega CRH	2010	0.58	30/01/2010	Yes	Negative	Negative	Negative			Discharge alive
Kakamega CRH	2010	1.17	30/01/2010	Yes	Negative	Negative	Negative			Discharge alive
Kenyatta NH	2010	0.25	30/01/2010	Yes	Negative	Negative	Negative			Unknown
Kenyatta NH	2010	0.58	30/01/2010	Yes	Negative	Negative	Negative			Unknown
Kenyatta NH	2010	0.5	30/01/2010	Yes	Negative	Negative	Negative			Unknown
Mombasa CRH	2010	5	30/01/2010	Yes	Negative	Negative	Negative			Unknown
Nakuru CRH	2010	0.17	30/01/2010	Yes	Negative	Negative	Negative			Unknown
Nyeri CRH	2010	3	30/01/2010	Yes	Negative	Negative	Negative			Discharge alive
Nyeri CRH	2010	2	30/01/2010	Yes	Negative	Negative	Negative			Discharge alive
Siaya CRH	2010	0.23	30/01/2010	Yes	Negative	Negative	Negative			Discharge alive
Siaya CRH	2010	0.38	30/01/2010	Yes	Negative	Negative	Negative			Discharge alive
Siaya CRH	2010	7.57	30/01/2010	Yes	Negative	Positive	Positive			Discharge alive
Siaya CRH	2010	0.28	30/01/2010	Yes	Negative	Negative	Negative			Discharge alive
Siaya CRH	2010	0.44	30/01/2010	Yes	Negative	Negative	Negative			Discharge alive
Siaya CRH	2010	1.34	30/01/2010	Yes	Negative	Negative	Negative			Discharge alive
Siaya CRH	2010	1.78	30/01/2010	Yes	Negative	Negative	Negative			Discharge alive
Siaya CRH	2010	2.12	30/01/2010	Yes	Negative	Negative	Negative			Discharge alive
Siaya CRH	2010	1.7	31/01/2010	No	Negative	Negative				Discharge alive
Siaya CRH	2010	1.26	31/01/2010	No	Negative	Negative				Discharge alive
Kakamega CRH	2010	5.5	31/01/2010	Yes	Negative	Negative	Negative			Discharge alive
Kakamega CRH	2010	3	31/01/2010	Yes	Negative	Negative	Negative			Discharge alive
Kenyatta NH	2010	0.5	31/01/2010	Yes	Negative	Negative	Negative			Unknown
Mombasa CRH	2010	1.5	31/01/2010	Yes	Negative	Negative	Negative			Unknown
Mombasa CRH	2010	0.83	31/01/2010	Yes	Negative	Negative	Negative			Unknown
Mombasa CRH	2010	0.33	31/01/2010	Yes	Negative	Negative	Negative			Unknown
Nakuru CRH	2010	2	31/01/2010	Yes	Negative	Negative	Negative			Unknown
Nakuru CRH	2010	0.58	31/01/2010	Yes	Negative	Negative	Negative			Unknown
Nakuru CRH	2010	0.42	31/01/2010	Yes	Negative	Negative	Negative			Unknown
Nyeri CRH	2010	2.17	31/01/2010	Yes	Negative	Negative	Negative			Discharge alive
Nyeri CRH	2010	3	31/01/2010	Yes	Negative	Negative	Negative			Died
Nyeri CRH	2010	0.58	31/01/2010	Yes	Negative	Negative	Negative			Discharge alive
Nyeri CRH	2010	3	31/01/2010	Yes	Negative	Negative	Negative			Discharge alive
Nyeri CRH	2010	0.42	31/01/2010	Yes	Negative	Negative	Negative			Discharge alive
Siaya CRH	2010	2.75	31/01/2010	Yes	Negative	Negative	Negative			Discharge alive
Siaya CRH	2010	2.04	31/01/2010	Yes	Negative	Negative	Negative			Discharge alive
Siaya CRH	2010	0.93	31/01/2010	Yes	Negative	Negative	Negative			Discharge alive
Siaya CRH	2010	0.41	31/01/2010	Yes	Negative	Negative	Negative			Discharge alive
Siaya CRH	2010	0.48	31/01/2010	Yes	Negative	Negative	Negative			Discharge alive
Siaya CRH	2010	9.67	01/02/2010	No	Negative	Negative				Discharge alive
Kakamega CRH	2010	1.5	01/02/2010	Yes	Negative	Negative	Negative			Discharge alive
Mombasa CRH	2010	0.5	01/02/2010	Yes	Negative	Negative	Negative			Unknown
Mombasa CRH	2010	13	01/02/2010	Yes	Negative	Negative	Negative			Unknown
Nakuru CRH	2010	0.83	01/02/2010	Yes	Negative	Negative	Negative			Unknown
Nyeri CRH	2010	1.08	01/02/2010	Yes	Negative	Negative	Negative			Discharge alive
Nyeri CRH	2010	4	01/02/2010	Yes	Negative	Negative	Negative			Discharge alive
Nyeri CRH	2010	0.17	01/02/2010	Yes	Negative	Negative	Negative			Discharge alive
Siaya CRH	2010	0.38	01/02/2010	Yes	Negative	Negative	Negative			Discharge alive
Siaya CRH	2010	1.13	01/02/2010	Yes	Negative	Negative	Negative			Discharge alive
Siaya CRH	2010	0.32	01/02/2010	Yes	Negative	Negative	Negative			Discharge alive
Siaya CRH	2010	1	01/02/2010	Yes	Negative	Negative	Negative			Discharge alive
Siaya CRH	2010	0.36	01/02/2010	Yes	Negative	Negative	Negative			Discharge alive
Siaya CRH	2010	0.57	01/02/2010	Yes	Negative	Negative	Negative			Discharge alive
Siaya CRH	2010	0.57	02/02/2010	No	Negative	Negative				Discharge alive
Kakamega CRH	2010	4.83	02/02/2010	Yes	Negative	Negative	Negative			Discharge alive
Kenyatta NH	2010	0.67	02/02/2010	Yes	Negative	Negative	Negative			Unknown
Kenyatta NH	2010	0.75	02/02/2010	Yes	Negative	Negative	Negative			Unknown
Mombasa CRH	2010	0.83	02/02/2010	Yes	Negative	Negative	Negative			Unknown
Mombasa CRH	2010	0.75	02/02/2010	Yes	Negative	Negative	Negative			Unknown
Nakuru CRH	2010	2.5	02/02/2010	Yes	Negative	Negative	Negative			Unknown
Nyeri CRH	2010	0.33	02/02/2010	Yes	Negative	Negative	Negative			Discharge alive
Nyeri CRH	2010	0.42	02/02/2010	Yes	Negative	Negative	Negative			Discharge alive
Siaya CRH	2010	0.78	02/02/2010	Yes	Negative	Negative	Negative			Discharge alive
Siaya CRH	2010	0.82	02/02/2010	Yes	Negative	Negative	Negative			Discharge alive
Siaya CRH	2010	1	02/02/2010	Yes	Negative	Negative	Negative			Discharge alive
Siaya CRH	2010	0.73	02/02/2010	Yes	Negative	Negative	Negative			Discharge alive
Siaya CRH	2010	0.44	02/02/2010	Yes	Negative	Negative	Negative			Discharge alive
Siaya CRH	2010	1.62	02/02/2010	Yes	Negative	Negative	Negative			Discharge alive
Siaya CRH	2010	0.89	02/02/2010	Yes	Negative	Negative	Negative			Discharge alive
Siaya CRH	2010	0.85	02/02/2010	Yes	Negative	Negative	Negative			Discharge alive
Kakamega CRH	2010	2.25	03/02/2010	Yes	Negative	Negative	Negative			Discharge alive
Kenyatta NH	2010	0.33	03/02/2010	Yes	Negative	Negative	Negative			Unknown
Mombasa CRH	2010	5	03/02/2010	Yes	Negative	Negative	Negative			Unknown
Mombasa CRH	2010	0.67	03/02/2010	Yes	Negative	Negative	Negative			Unknown
Mombasa CRH	2010	0.67	03/02/2010	Yes	Negative	Negative	Negative			Unknown
Nyeri CRH	2010	0.92	03/02/2010	Yes	Negative	Negative	Negative			Discharge alive
Nyeri CRH	2010	4.5	03/02/2010	Yes	Negative	Negative	Negative			Unknown
Siaya CRH	2010	0.24	03/02/2010	Yes	Negative	Negative	Negative			Discharge alive
Siaya CRH	2010	0.37	03/02/2010	Yes	Negative	Negative	Negative			Discharge alive
Siaya CRH	2010	0.83	03/02/2010	Yes	Negative	Negative	Negative			Discharge alive
Siaya CRH	2010	9.24	03/02/2010	Yes	Negative	Negative	Negative			Discharge alive
Siaya CRH	2010	0.84	03/02/2010	Yes	Negative	Negative	Negative			Discharge alive
Kakamega CRH	2010	1.08	04/02/2010	Yes	Negative	Negative	Negative			Discharge alive
Kakamega CRH	2010	0.67	04/02/2010	Yes	Negative	Negative	Negative			Discharge alive
Kenyatta NH	2010	0.5	04/02/2010	Yes	Negative	Negative	Negative			Unknown
Mombasa CRH	2010	2	04/02/2010	Yes	Negative	Negative	Negative			Unknown
Nakuru CRH	2010	0.83	04/02/2010	Yes	Negative	Negative	Negative			Unknown
Nakuru CRH	2010	3	04/02/2010	Yes	Negative	Negative	Negative			Unknown
Nakuru CRH	2010	2	04/02/2010	Yes	Negative	Negative	Negative			Unknown
Nakuru CRH	2010	4	04/02/2010	Yes	Negative	Negative	Negative			Unknown
Nyeri CRH	2010	1	04/02/2010	Yes	Negative	Negative	Negative			Discharge alive
Nyeri CRH	2010	3	04/02/2010	Yes	Negative	Negative	Negative			Discharge alive
Siaya CRH	2010	0.57	04/02/2010	Yes	Negative	Negative	Negative			Discharge alive
Siaya CRH	2010	0.34	04/02/2010	Yes	Negative	Negative	Negative			Discharge alive
Siaya CRH	2010	0.86	04/02/2010	Yes	Negative	Negative	Negative			Discharge alive
Siaya CRH	2010	3.84	05/02/2010	No	Negative	Negative				Discharge alive
Kakamega CRH	2010	17	05/02/2010	Yes	Negative	Negative	Negative			Unknown
Kenyatta NH	2010	1.5	05/02/2010	Yes	Negative	Negative	Negative			Unknown
Kenyatta NH	2010	0.75	05/02/2010	Yes	Negative	Negative	Negative			Unknown
Nakuru CRH	2010	1.83	05/02/2010	Yes	Negative	Negative	Negative			Unknown
Nakuru CRH	2010	5	05/02/2010	Yes	Negative	Negative	Negative			Unknown
Nyeri CRH	2010	1.17	05/02/2010	Yes	Negative	Negative	Negative			Discharge alive
Siaya CRH	2010	1.42	05/02/2010	Yes	Negative	Negative	Negative			Discharge alive
Siaya CRH	2010	0.4	05/02/2010	Yes	Negative	Negative	Negative			Discharge alive
Siaya CRH	2010	0.31	05/02/2010	Yes	Negative	Negative	Negative			Discharge alive
Siaya CRH	2010	0.6	05/02/2010	Yes	Negative	Negative	Negative			Discharge alive
Kakamega CRH	2010	1.17	06/02/2010	Yes	Negative	Negative	Negative			Discharge alive
Kakamega CRH	2010	2	06/02/2010	Yes	Negative	Negative	Negative			Discharge alive
Kenyatta NH	2010	0.75	06/02/2010	Yes	Negative	Negative	Negative			Unknown
Mombasa CRH	2010	0.25	06/02/2010	Yes	Negative	Negative	Negative			Unknown
Nakuru CRH	2010	2.08	06/02/2010	Yes	Negative	Negative	Negative			Unknown
Nyeri CRH	2010	0.17	06/02/2010	Yes	Negative	Negative	Negative			Discharge alive
Siaya CRH	2010	4.3	06/02/2010	Yes	Negative	Negative	Negative			Discharge alive
Siaya CRH	2010	0.13	06/02/2010	Yes	Negative	Negative	Negative			Discharge alive
Siaya CRH	2010	0.3	06/02/2010	Yes	Negative	Negative	Negative			Discharge alive
Kakamega CRH	2010	1.08	06/02/2010	Yes	Positive	Negative	Positive	No	No	Discharge alive
Mombasa CRH	2010	0.75	06/02/2010	Yes	Positive	Negative	Positive	No	No	Unknown
Kakamega CRH	2010	5	07/02/2010	Yes	Negative	Negative	Negative			Discharge alive
Kakamega CRH	2010	3.17	07/02/2010	Yes	Negative	Negative	Negative			Discharge alive
Kakamega CRH	2010	2	07/02/2010	Yes	Negative	Negative	Negative			Discharge alive
Kakamega CRH	2010	0.67	07/02/2010	Yes	Negative	Negative	Negative			Discharge alive
Kakamega CRH	2010	0.92	07/02/2010	Yes	Negative	Negative	Negative			Discharge alive
Kenyatta NH	2010	0.5	07/02/2010	Yes	Negative	Negative	Negative			Unknown
Kenyatta NH	2010	1.67	07/02/2010	Yes	Negative	Negative	Negative			Unknown
Kenyatta NH	2010	0.83	07/02/2010	Yes	Negative	Negative	Negative			Unknown
Nyeri CRH	2010	1.08	07/02/2010	Yes	Negative	Negative	Negative			Discharge alive
Nyeri CRH	2010	1.08	07/02/2010	Yes	Negative	Negative	Negative			Discharge alive
Nyeri CRH	2010	0.67	07/02/2010	Yes	Negative	Negative	Negative			Discharge alive
Nyeri CRH	2010	0.5	07/02/2010	Yes	Negative	Negative	Negative			Discharge alive
Nyeri CRH	2010	0.92	07/02/2010	Yes	Negative	Negative	Negative			Discharge alive
Nyeri CRH	2010	3.92	07/02/2010	Yes	Negative	Negative	Negative			Unknown
Nyeri CRH	2010	2	07/02/2010	Yes	Negative	Negative	Negative			Discharge alive
Siaya CRH	2010	0.19	07/02/2010	Yes	Negative	Negative	Negative			Discharge alive
Siaya CRH	2010	2.35	07/02/2010	Yes	Negative	Negative	Negative			Discharge alive
Siaya CRH	2010	7.91	07/02/2010	Yes	Negative	Negative	Negative			Discharge alive
Siaya CRH	2010	0.93	07/02/2010	Yes	Negative	Negative	Negative			Discharge alive
Siaya CRH	2010	1.05	07/02/2010	Yes	Negative	Negative	Negative			Other
Siaya CRH	2010	2.96	07/02/2010	Yes	Negative	Negative	Negative			Discharge alive
Siaya CRH	2010	3.86	07/02/2010	Yes	Negative	Negative	Negative			Discharge alive
Siaya CRH	2010	1.85	07/02/2010	Yes	Negative	Negative	Negative			Discharge alive
Siaya CRH	2010	1.37	07/02/2010	Yes	Negative	Negative	Negative			Discharge alive
Siaya CRH	2010	1.66	07/02/2010	Yes	Negative	Negative	Negative			Discharge alive
Kakamega CRH	2010	1	08/02/2010	Yes	Negative	Negative	Negative			Discharge alive
Kakamega CRH	2010	1	08/02/2010	Yes	Negative	Negative	Negative			Discharge alive
Kakamega CRH	2010	1.75	08/02/2010	Yes	Negative	Negative	Negative			Discharge alive
Kenyatta NH	2010	1.92	08/02/2010	Yes	Negative	Negative	Negative			Unknown
Kenyatta NH	2010	0.5	08/02/2010	Yes	Negative	Negative	Negative			Unknown
Mombasa CRH	2010	1.33	08/02/2010	Yes	Negative	Negative	Negative			Unknown
Mombasa CRH	2010	1.33	08/02/2010	Yes	Negative	Negative	Negative			Unknown
Mombasa CRH	2010	1.33	08/02/2010	Yes	Negative	Negative	Negative			Unknown
Nakuru CRH	2010	0.42	08/02/2010	Yes	Negative	Negative	Negative			Unknown
Nyeri CRH	2010	1.5	08/02/2010	Yes	Negative	Negative	Negative			Unknown
Siaya CRH	2010	27.66	08/02/2010	Yes	Negative	Negative	Negative			Discharge alive
Siaya CRH	2010	2.42	08/02/2010	Yes	Negative	Negative	Negative			Discharge alive
Siaya CRH	2010	0.25	08/02/2010	Yes	Negative	Negative	Negative			Discharge alive
Siaya CRH	2010	0.62	08/02/2010	Yes	Negative	Negative	Negative			Discharge alive
Siaya CRH	2010	1.62	08/02/2010	Yes	Negative	Positive	Positive			Discharge alive
Siaya CRH	2010	0.65	08/02/2010	Yes	Negative	Negative	Negative			Discharge alive
Siaya CRH	2010	0.22	08/02/2010	Yes	Negative	Negative	Negative			Discharge alive
Nyeri CRH	2010	0.58	09/02/2010	No						Discharge alive
Nyeri CRH	2010	1.33	09/02/2010	No						Discharge alive
Kakamega CRH	2010	1.17	09/02/2010	Yes	Negative	Negative	Negative			Discharge alive
Kakamega CRH	2010	35	09/02/2010	Yes	Negative	Negative	Negative			Discharge alive
Kenyatta NH	2010	1	09/02/2010	Yes	Negative	Negative	Negative			Unknown
Kenyatta NH	2010	1.33	09/02/2010	Yes	Negative	Negative	Negative			Unknown
Mombasa CRH	2010	0.5	09/02/2010	Yes	Negative	Negative	Negative			Unknown
Mombasa CRH	2010	7	09/02/2010	Yes	Negative	Negative	Negative			Unknown
Nakuru CRH	2010	0.42	09/02/2010	Yes	Negative	Negative	Negative			Unknown
Nakuru CRH	2010	0.67	09/02/2010	Yes	Negative	Negative	Negative			Unknown
Nyeri CRH	2010	1	09/02/2010	Yes	Negative	Negative	Negative			Died
Nyeri CRH	2010	0	09/02/2010	Yes	Negative	Negative	Negative			Unknown
Nyeri CRH	2010	1.83	09/02/2010	Yes	Negative	Negative	Negative			Discharge alive
Siaya CRH	2010	45.67	09/02/2010	Yes	Negative	Negative	Negative			Discharge alive
Siaya CRH	2010	1.42	09/02/2010	Yes	Negative	Negative	Negative			Discharge alive
Siaya CRH	2010	4.5	09/02/2010	Yes	Negative	Negative	Negative			Discharge alive
Siaya CRH	2010	1.61	09/02/2010	Yes	Negative	Negative	Negative			Discharge alive
Siaya CRH	2010	0.9	09/02/2010	Yes	Negative	Negative	Negative			Discharge alive
Siaya CRH	2010	0.42	09/02/2010	Yes	Positive	Negative	Positive	No	No	Discharge alive
Siaya CRH	2010	1.82	09/02/2010	Yes	Positive	Negative	Positive	No	No	Other
Siaya CRH	2010	0.94	10/02/2010	No	Negative	Negative				Died
Siaya CRH	2010	3.63	10/02/2010	No	Negative	Negative				Discharge alive
Kakamega CRH	2010	0.5	10/02/2010	Yes	Negative	Negative	Negative			Unknown
Kenyatta NH	2010	0.42	10/02/2010	Yes	Negative	Negative	Negative			Unknown
Kenyatta NH	2010	2.33	10/02/2010	Yes	Negative	Negative	Negative			Unknown
Kenyatta NH	2010	1.5	10/02/2010	Yes	Negative	Negative	Negative			Unknown
Kenyatta NH	2010	0.67	10/02/2010	Yes	Negative	Negative	Negative			Unknown
Mombasa CRH	2010	1.5	10/02/2010	Yes	Negative	Negative	Negative			Unknown
Nakuru CRH	2010	4	10/02/2010	Yes	Negative	Negative	Negative			Unknown
Siaya CRH	2010	0.91	10/02/2010	Yes	Negative	Negative	Negative			Discharge alive
Siaya CRH	2010	1.14	10/02/2010	Yes	Negative	Negative	Negative			Discharge alive
Siaya CRH	2010	1.23	10/02/2010	Yes	Negative	Negative	Negative			Discharge alive
Siaya CRH	2010	0.37	10/02/2010	Yes	Negative	Negative	Negative			Died
Siaya CRH	2010	0.86	10/02/2010	Yes	Negative	Negative	Negative			Discharge alive
Siaya CRH	2010	0.61	11/02/2010	No	Negative	Negative				Died
Kenyatta NH	2010	0.5	11/02/2010	Yes	Negative	Negative	Negative			Unknown
Kenyatta NH	2010	1.75	11/02/2010	Yes	Negative	Negative	Negative			Unknown
Kenyatta NH	2010	0.17	11/02/2010	Yes	Negative	Negative	Negative			Unknown
Mombasa CRH	2010	0.75	11/02/2010	Yes	Negative	Negative	Negative			Unknown
Mombasa CRH	2010	9	11/02/2010	Yes	Negative	Negative	Negative			Unknown
Siaya CRH	2010	1.29	11/02/2010	Yes	Negative	Negative	Negative			Unknown
Siaya CRH	2010	3.22	11/02/2010	Yes	Negative	Negative	Negative			Discharge alive
Siaya CRH	2010	0.67	11/02/2010	Yes	Negative	Negative	Negative			Discharge alive
Siaya CRH	2010	0.58	11/02/2010	Yes	Negative	Negative	Negative			Discharge alive
Siaya CRH	2010	1.96	11/02/2010	Yes	Negative	Negative	Negative			Discharge alive
Siaya CRH	2010	0.27	11/02/2010	Yes	Negative	Positive	Positive			Discharge alive
Siaya CRH	2010	2.59	11/02/2010	Yes	Negative	Negative	Negative			Discharge alive
Kakamega CRH	2010	1	12/02/2010	Yes	Negative	Negative	Negative			Discharge alive
Kenyatta NH	2010	0.5	12/02/2010	Yes	Negative	Negative	Negative			Unknown
Kenyatta NH	2010	0.58	12/02/2010	Yes	Negative	Negative	Negative			Unknown
Kenyatta NH	2010	0.33	12/02/2010	Yes	Negative	Negative	Negative			Unknown
Mombasa CRH	2010	0.92	12/02/2010	Yes	Negative	Negative	Negative			Unknown
Mombasa CRH	2010	0.67	12/02/2010	Yes	Negative	Negative	Negative			Unknown
Nyeri CRH	2010	3.5	12/02/2010	Yes	Negative	Negative	Negative			Discharge alive
Siaya CRH	2010	80.67	12/02/2010	Yes	Negative	Negative	Negative			Discharge alive
Siaya CRH	2010	5.25	12/02/2010	Yes	Negative	Negative	Negative			Discharge alive
Siaya CRH	2010	0.24	12/02/2010	Yes	Negative	Negative	Negative			Other
Siaya CRH	2010	0.58	12/02/2010	Yes	Negative	Negative	Negative			Discharge alive
Siaya CRH	2010	0.71	12/02/2010	Yes	Negative	Negative	Negative			Discharge alive
Siaya CRH	2010	0.39	12/02/2010	Yes	Negative	Negative	Negative			Discharge alive
Siaya CRH	2010	2.62	12/02/2010	Yes	Negative	Negative	Negative			Discharge alive
Siaya CRH	2010	1.38	13/02/2010	No	Negative	Negative				Discharge alive
Kakamega CRH	2010	2	13/02/2010	Yes	Negative	Negative	Negative			Discharge alive
Kakamega CRH	2010	6	13/02/2010	Yes	Negative	Negative	Negative			Discharge alive
Kakamega CRH	2010	0.83	13/02/2010	Yes	Negative	Negative	Negative			Discharge alive
Kenyatta NH	2010	0.83	13/02/2010	Yes	Negative	Negative	Negative			Unknown
Mombasa CRH	2010	0.83	13/02/2010	Yes	Negative	Negative	Negative			Unknown
Mombasa CRH	2010	2	13/02/2010	Yes	Negative	Negative	Negative			Unknown
Mombasa CRH	2010	2	13/02/2010	Yes	Negative	Negative	Negative			Unknown
Nakuru CRH	2010	0.42	13/02/2010	Yes	Negative	Negative	Negative			Unknown
Nakuru CRH	2010	0.67	13/02/2010	Yes	Negative	Negative	Negative			Unknown
Nakuru CRH	2010	2.08	13/02/2010	Yes	Negative	Negative	Negative			Unknown
Nyeri CRH	2010	1.25	13/02/2010	Yes	Negative	Negative	Negative			Discharge alive
Siaya CRH	2010	2.16	13/02/2010	Yes	Negative	Negative	Negative			Discharge alive
Siaya CRH	2010	4.8	13/02/2010	Yes	Negative	Negative	Negative			Discharge alive
Siaya CRH	2010	1.05	13/02/2010	Yes	Negative	Negative	Negative			Discharge alive
Siaya CRH	2010	0.42	13/02/2010	Yes	Negative	Negative	Negative			Discharge alive
Siaya CRH	2010	1.52	13/02/2010	Yes	Negative	Negative	Negative			Discharge alive
Mombasa CRH	2010	4.5	13/02/2010	Yes	Positive	Positive	Positive	No	No	Unknown
Nakuru CRH	2010	0.75	14/02/2010	No						Unknown
Kakamega CRH	2010	1	14/02/2010	Yes	Negative	Negative	Negative			Discharge alive
Kenyatta NH	2010	0.83	14/02/2010	Yes	Negative	Negative	Negative			Unknown
Kenyatta NH	2010	0.5	14/02/2010	Yes	Negative	Negative	Negative			Unknown
Kenyatta NH	2010	0.5	14/02/2010	Yes	Negative	Negative	Negative			Unknown
Mombasa CRH	2010	0.83	14/02/2010	Yes	Negative	Negative	Negative			Unknown
Mombasa CRH	2010	0.58	14/02/2010	Yes	Negative	Negative	Negative			Unknown
Nyeri CRH	2010	2.75	14/02/2010	Yes	Negative	Negative	Negative			Discharge alive
Nyeri CRH	2010	0.67	14/02/2010	Yes	Negative	Negative	Negative			Discharge alive
Nyeri CRH	2010	1.17	14/02/2010	Yes	Negative	Negative	Negative			Discharge alive
Nyeri CRH	2010	3	14/02/2010	Yes	Negative	Negative	Negative			Discharge alive
Nyeri CRH	2010	0.58	14/02/2010	Yes	Negative	Negative	Negative			Unknown
Siaya CRH	2010	14.43	14/02/2010	Yes	Negative	Negative	Negative			Discharge alive
Siaya CRH	2010	0.12	14/02/2010	Yes	Negative	Negative	Negative			Discharge alive
Siaya CRH	2010	0.52	14/02/2010	Yes	Negative	Negative	Negative			Discharge alive
Siaya CRH	2010	4.01	14/02/2010	Yes	Negative	Negative	Negative			Died
Kakamega CRH	2010	0.33	15/02/2010	Yes	Negative	Negative	Negative			Discharge alive
Kakamega CRH	2010	3.5	15/02/2010	Yes	Negative	Negative	Negative			Discharge alive
Kenyatta NH	2010	1.17	15/02/2010	Yes	Negative	Negative	Negative			Unknown
Nakuru CRH	2010	0.58	15/02/2010	Yes	Negative	Negative	Negative			Unknown
Nakuru CRH	2010	0.92	15/02/2010	Yes	Negative	Negative	Negative			Unknown
Siaya CRH	2010	3.4	15/02/2010	Yes	Negative	Negative	Negative			Discharge alive
Siaya CRH	2010	0.76	15/02/2010	Yes	Negative	Negative	Negative			Discharge alive
Siaya CRH	2010	0.51	15/02/2010	Yes	Negative	Negative	Negative			Discharge alive
Siaya CRH	2010	3.4	15/02/2010	Yes	Negative	Negative	Negative			Discharge alive
Siaya CRH	2010	0.4	15/02/2010	Yes	Negative	Negative	Negative			Discharge alive
Siaya CRH	2010	0.28	15/02/2010	Yes	Negative	Negative	Negative			Discharge alive
Siaya CRH	2010	1.2	15/02/2010	Yes	Negative	Negative	Negative			Discharge alive
Siaya CRH	2010	0.89	15/02/2010	Yes	Negative	Negative	Negative			Discharge alive
Siaya CRH	2010	3.12	16/02/2010	No	Negative	Negative				Discharge alive
Mombasa CRH	2010	3	16/02/2010	Yes	Negative	Negative	Negative			Unknown
Nakuru CRH	2010	0.92	16/02/2010	Yes	Negative	Negative	Negative			Unknown
Siaya CRH	2010	13.68	16/02/2010	Yes	Negative	Negative	Negative			Discharge alive
Siaya CRH	2010	0.52	16/02/2010	Yes	Negative	Negative	Negative			Discharge alive
Siaya CRH	2010	0.55	16/02/2010	Yes	Negative	Negative	Negative			Discharge alive
Siaya CRH	2010	8.13	16/02/2010	Yes	Negative	Negative	Negative			Other
Siaya CRH	2010	1.95	16/02/2010	Yes	Negative	Negative	Negative			Discharge alive
Siaya CRH	2010	0.27	16/02/2010	Yes	Positive	Negative	Positive	Yes	No	Discharge alive
Kakamega CRH	2010	5	17/02/2010	Yes	Negative	Negative	Negative			Discharge alive
Kenyatta NH	2010	0.17	17/02/2010	Yes	Negative	Negative	Negative			Unknown
Kenyatta NH	2010	1.58	17/02/2010	Yes	Negative	Negative	Negative			Unknown
Kenyatta NH	2010	0.58	17/02/2010	Yes	Negative	Negative	Negative			Unknown
Nakuru CRH	2010	1.17	17/02/2010	Yes	Negative	Negative	Negative			Unknown
Nakuru CRH	2010	0.25	17/02/2010	Yes	Negative	Negative	Negative			Unknown
Nakuru CRH	2010	0.17	17/02/2010	Yes	Negative	Negative	Negative			Unknown
Nakuru CRH	2010	0.33	17/02/2010	Yes	Negative	Negative	Negative			Unknown
Nyeri CRH	2010	0.92	17/02/2010	Yes	Negative	Negative	Negative			Discharge alive
Siaya CRH	2010	65.69	17/02/2010	Yes	Negative	Negative	Negative			Died
Siaya CRH	2010	4.68	17/02/2010	Yes	Negative	Negative	Negative			Discharge alive
Siaya CRH	2010	1.73	17/02/2010	Yes	Negative	Negative	Negative			Discharge alive
Siaya CRH	2010	0.72	18/02/2010	No	Negative	Negative				Discharge alive
Siaya CRH	2010	1.07	18/02/2010	No	Negative	Negative				Discharge alive
Siaya CRH	2010	0.23	18/02/2010	No	Negative	Negative				Discharge alive
Kenyatta NH	2010	6	18/02/2010	Yes	Negative	Negative	Negative			Unknown
Kenyatta NH	2010	0.33	18/02/2010	Yes	Negative	Negative	Negative			Unknown
Kenyatta NH	2010	0.33	18/02/2010	Yes	Negative	Negative	Negative			Unknown
Mombasa CRH	2010	4	18/02/2010	Yes	Negative	Negative	Negative			Unknown
Nakuru CRH	2010	0.33	18/02/2010	Yes	Negative	Negative	Negative			Unknown
Nakuru CRH	2010	0.75	18/02/2010	Yes	Negative	Negative	Negative			Unknown
Nakuru CRH	2010	1	18/02/2010	Yes	Negative	Negative	Negative			Unknown
Nyeri CRH	2010	0.5	18/02/2010	Yes	Negative	Negative	Negative			Unknown
Nyeri CRH	2010	1.58	18/02/2010	Yes	Negative	Negative	Negative			Discharge alive
Siaya CRH	2010	0.55	18/02/2010	Yes	Negative	Negative	Negative			Discharge alive
Siaya CRH	2010	0.48	18/02/2010	Yes	Negative	Negative	Negative			Discharge alive
Siaya CRH	2010	0.27	19/02/2010	No	Negative	Negative				Discharge alive
Kakamega CRH	2010	5	19/02/2010	No						Discharge alive
Kakamega CRH	2010	2	19/02/2010	Yes	Negative	Negative	Negative			Discharge alive
Kakamega CRH	2010	0.75	19/02/2010	Yes	Negative	Negative	Negative			Discharge alive
Kenyatta NH	2010	1	19/02/2010	Yes	Negative	Negative	Negative			Unknown
Mombasa CRH	2010	0.5	19/02/2010	Yes	Negative	Negative	Negative			Unknown
Nyeri CRH	2010	2	19/02/2010	Yes	Negative	Negative	Negative			Discharge alive
Siaya CRH	2010	1.71	19/02/2010	Yes	Negative	Negative	Negative			Discharge alive
Siaya CRH	2010	0.41	19/02/2010	Yes	Negative	Negative	Negative			Discharge alive
Siaya CRH	2010	3.24	19/02/2010	Yes	Negative	Negative	Negative			Discharge alive
Siaya CRH	2010	1.37	19/02/2010	Yes	Negative	Negative	Negative			Discharge alive
Siaya CRH	2010	0.44	19/02/2010	Yes	Negative	Negative	Negative			Died
Siaya CRH	2010	7.25	19/02/2010	Yes	Negative	Negative	Negative			Discharge alive
Mombasa CRH	2010	0.33	20/02/2010	Yes	Negative	Negative	Negative			Unknown
Mombasa CRH	2010	2	20/02/2010	Yes	Negative	Negative	Negative			Unknown
Nakuru CRH	2010	0.5	20/02/2010	Yes	Negative	Negative	Negative			Unknown
Nakuru CRH	2010	0.17	20/02/2010	Yes	Negative	Positive	Positive			Unknown
Nakuru CRH	2010	0.33	20/02/2010	Yes	Negative	Negative	Negative			Unknown
Nyeri CRH	2010	0.42	20/02/2010	Yes	Negative	Positive	Positive			Unknown
Siaya CRH	2010	5.96	20/02/2010	Yes	Negative	Negative	Negative			Discharge alive
Siaya CRH	2010	0.98	20/02/2010	Yes	Negative	Negative	Negative			Discharge alive
Siaya CRH	2010	0.17	20/02/2010	Yes	Negative	Negative	Negative			Discharge alive
Kenyatta NH	2010	1	20/02/2010	Yes	Positive	Negative	Positive	Yes	No	Unknown
Siaya CRH	2010	0.82	20/02/2010	Yes	Positive	Negative	Positive	No	No	Discharge alive
Siaya CRH	2010	2.5	21/02/2010	No	Negative	Negative				Discharge alive
Siaya CRH	2010	0.24	21/02/2010	No	Negative	Negative				Died
Kenyatta NH	2010	1	21/02/2010	Yes	Negative	Negative	Negative			Unknown
Nakuru CRH	2010	4.67	21/02/2010	Yes	Negative	Negative	Negative			Unknown
Nyeri CRH	2010	0.75	21/02/2010	Yes	Negative	Negative	Negative			Discharge alive
Siaya CRH	2010	1.28	21/02/2010	Yes	Negative	Negative	Negative			Discharge alive
Siaya CRH	2010	0.91	21/02/2010	Yes	Negative	Negative	Negative			Discharge alive
Siaya CRH	2010	0.58	21/02/2010	Yes	Negative	Negative	Negative			Discharge alive
Siaya CRH	2010	0.09	21/02/2010	Yes	Positive	Negative	Positive	No	No	Discharge alive
Kakamega CRH	2010	3	22/02/2010	No						Discharge alive
Kenyatta NH	2010	0.42	22/02/2010	Yes	Negative	Negative	Negative			Unknown
Mombasa CRH	2010	1.5	22/02/2010	Yes	Negative	Negative	Negative			Unknown
Nakuru CRH	2010	1.92	22/02/2010	Yes	Negative	Negative	Negative			Unknown
Nakuru CRH	2010	0.5	22/02/2010	Yes	Negative	Negative	Negative			Unknown
Nyeri CRH	2010	1.42	22/02/2010	Yes	Negative	Positive	Positive			Discharge alive
Nyeri CRH	2010	0.25	22/02/2010	Yes	Negative	Negative	Negative			Discharge alive
Siaya CRH	2010	55.72	22/02/2010	Yes	Negative	Negative	Negative			Discharge alive
Siaya CRH	2010	0.31	22/02/2010	Yes	Negative	Negative	Negative			Discharge alive
Siaya CRH	2010	4.29	22/02/2010	Yes	Negative	Negative	Negative			Discharge alive
Siaya CRH	2010	2.14	22/02/2010	Yes	Negative	Negative	Negative			Discharge alive
Siaya CRH	2010	0.6	22/02/2010	Yes	Negative	Negative	Negative			Discharge alive
Siaya CRH	2010	2.68	22/02/2010	Yes	Negative	Negative	Negative			Discharge alive
Kenyatta NH	2010	0.17	22/02/2010	Yes	Positive	Negative	Positive	No	No	Unknown
Nyeri CRH	2010	0.5	22/02/2010	Yes	Positive	Negative	Positive	No	No	Unknown
Siaya CRH	2010	0.68	23/02/2010	No	Negative	Negative				Discharge alive
Mombasa CRH	2010	7	23/02/2010	Yes	Negative	Negative	Negative			Unknown
Mombasa CRH	2010	1.33	23/02/2010	Yes	Negative	Negative	Negative			Unknown
Nakuru CRH	2010	0.42	23/02/2010	Yes	Negative	Negative	Negative			Unknown
Nakuru CRH	2010	2	23/02/2010	Yes	Negative	Negative	Negative			Unknown
Nakuru CRH	2010	0.33	23/02/2010	Yes	Negative	Negative	Negative			Unknown
Siaya CRH	2010	5.8	23/02/2010	Yes	Negative	Negative	Negative			Discharge alive
Siaya CRH	2010	1.3	23/02/2010	Yes	Negative	Negative	Negative			Discharge alive
Siaya CRH	2010	0.89	23/02/2010	Yes	Negative	Negative	Negative			Discharge alive
Siaya CRH	2010	0.09	23/02/2010	Yes	Negative	Negative	Negative			Discharge alive
Siaya CRH	2010	0.51	23/02/2010	Yes	Negative	Negative	Negative			Discharge alive
Siaya CRH	2010	1.67	23/02/2010	Yes	Negative	Negative	Negative			Discharge alive
Nyeri CRH	2010	0.5	23/02/2010	Yes	Positive	Negative	Positive	No	No	Unknown
Siaya CRH	2010	1.51	23/02/2010	Yes	Positive	Negative	Positive	No	No	Discharge alive
Kakamega CRH	2010	1.17	24/02/2010	Yes	Negative	Negative	Negative			Discharge alive
Kenyatta NH	2010	0.58	24/02/2010	Yes	Negative	Negative	Negative			Unknown
Mombasa CRH	2010	0.33	24/02/2010	Yes	Negative	Negative	Negative			Unknown
Nakuru CRH	2010	1	24/02/2010	Yes	Negative	Negative	Negative			Unknown
Nakuru CRH	2010	0.33	24/02/2010	Yes	Negative	Negative	Negative			Unknown
Nakuru CRH	2010	1.67	24/02/2010	Yes	Negative	Negative	Negative			Unknown
Nyeri CRH	2010	1.5	24/02/2010	Yes	Negative	Negative	Negative			Discharge alive
Siaya CRH	2010	0.29	24/02/2010	Yes	Negative	Negative	Negative			Discharge alive
Siaya CRH	2010	0.16	24/02/2010	Yes	Negative	Negative	Negative			Discharge alive
Siaya CRH	2010	4.28	24/02/2010	Yes	Negative	Negative	Negative			Discharge alive
Siaya CRH	2010	0.67	24/02/2010	Yes	Positive	Negative	Positive	No	No	Discharge alive
Kakamega CRH	2010	1.67	25/02/2010	Yes	Negative	Negative	Negative			Discharge alive
Kakamega CRH	2010	6	25/02/2010	Yes	Negative	Negative	Negative			Discharge alive
Kenyatta NH	2010	0.75	25/02/2010	Yes	Negative	Negative	Negative			Unknown
Mombasa CRH	2010	1.42	25/02/2010	Yes	Negative	Negative	Negative			Unknown
Mombasa CRH	2010	1.25	25/02/2010	Yes	Negative	Negative	Negative			Unknown
Nakuru CRH	2010	2	25/02/2010	Yes	Negative	Negative	Negative			Unknown
Nyeri CRH	2010	1.17	25/02/2010	Yes	Negative	Negative	Negative			Discharge alive
Nyeri CRH	2010	1.25	25/02/2010	Yes	Negative	Negative	Negative			Discharge alive
Nyeri CRH	2010	1	25/02/2010	Yes	Negative	Negative	Negative			Discharge alive
Nyeri CRH	2010	2.5	25/02/2010	Yes	Negative	Negative	Negative			Discharge alive
Siaya CRH	2010	3	25/02/2010	Yes	Negative	Negative	Negative			Discharge alive
Siaya CRH	2010	0.5	25/02/2010	Yes	Negative	Negative	Negative			Discharge alive
Siaya CRH	2010	0.52	26/02/2010	No	Negative	Negative				Died
Nakuru CRH	2010	2	26/02/2010	No						Unknown
Kakamega CRH	2010	2	26/02/2010	Yes	Negative	Negative	Negative			Discharge alive
Kakamega CRH	2010	0.83	26/02/2010	Yes	Negative	Negative	Negative			Discharge alive
Kakamega CRH	2010	2	26/02/2010	Yes	Negative	Negative	Negative			Discharge alive
Kakamega CRH	2010	1.83	26/02/2010	Yes	Negative	Negative	Negative			Discharge alive
Kakamega CRH	2010	3	26/02/2010	Yes	Negative	Negative	Negative			Discharge alive
Kakamega CRH	2010	0.92	26/02/2010	Yes	Negative	Negative	Negative			Unknown
Kenyatta NH	2010	1.83	26/02/2010	Yes	Negative	Negative	Negative			Unknown
Mombasa CRH	2010	0.75	26/02/2010	Yes	Negative	Negative	Negative			Unknown
Mombasa CRH	2010	0.58	26/02/2010	Yes	Negative	Negative	Negative			Unknown
Mombasa CRH	2010	1.08	26/02/2010	Yes	Negative	Negative	Negative			Unknown
Nakuru CRH	2010	2	26/02/2010	Yes	Negative	Negative	Negative			Unknown
Nakuru CRH	2010	1	26/02/2010	Yes	Negative	Negative	Negative			Unknown
Nakuru CRH	2010	4	26/02/2010	Yes	Negative	Negative	Negative			Unknown
Nyeri CRH	2010	2.5	26/02/2010	Yes	Negative	Negative	Negative			Discharge alive
Nyeri CRH	2010	1	26/02/2010	Yes	Negative	Negative	Negative			Discharge alive
Nyeri CRH	2010	0.83	26/02/2010	Yes	Negative	Negative	Negative			Discharge alive
Siaya CRH	2010	27.52	26/02/2010	Yes	Negative	Negative	Negative			Discharge alive
Siaya CRH	2010	2.23	26/02/2010	Yes	Negative	Negative	Negative			Discharge alive
Siaya CRH	2010	1.86	26/02/2010	Yes	Negative	Negative	Negative			Discharge alive
Siaya CRH	2010	1.35	26/02/2010	Yes	Negative	Positive	Positive			Discharge alive
Mombasa CRH	2010	2.17	26/02/2010	Yes	Positive	Negative	Positive	No	No	Unknown
Siaya CRH	2010	0.21	27/02/2010	No	Negative	Negative				Discharge alive
Kakamega CRH	2010	5	27/02/2010	Yes	Negative	Negative	Negative			Discharge alive
Nakuru CRH	2010	0.83	27/02/2010	Yes	Negative	Negative	Negative			Unknown
Nakuru CRH	2010	3	27/02/2010	Yes	Negative	Negative	Negative			Unknown
Nakuru CRH	2010	1	27/02/2010	Yes	Negative	Negative	Negative			Unknown
Siaya CRH	2010	2.52	27/02/2010	Yes	Negative	Negative	Negative			Discharge alive
Siaya CRH	2010	0.53	27/02/2010	Yes	Negative	Negative	Negative			Discharge alive
Siaya CRH	2010	4.02	27/02/2010	Yes	Negative	Negative	Negative			Discharge alive
Siaya CRH	2010	0.23	27/02/2010	Yes	Negative	Negative	Negative			Discharge alive
Nyeri CRH	2010	1.42	27/02/2010	Yes	Positive	Negative	Positive	No	No	Discharge alive
Siaya CRH	2010	1.27	27/02/2010	Yes	Positive	Negative	Positive	No	No	Discharge alive
Nyeri CRH	2010	0.83	28/02/2010	No						Discharge alive
Kakamega CRH	2010	0.5	28/02/2010	Yes	Negative	Negative	Negative			Discharge alive
Kenyatta NH	2010	0.5	28/02/2010	Yes	Negative	Negative	Negative			Unknown
Mombasa CRH	2010	1.17	28/02/2010	Yes	Negative	Negative	Negative			Unknown
Mombasa CRH	2010	0.5	28/02/2010	Yes	Negative	Negative	Negative			Unknown
Nakuru CRH	2010	0.17	28/02/2010	Yes	Negative	Negative	Negative			Unknown
Nyeri CRH	2010	1.42	28/02/2010	Yes	Negative	Negative	Negative			Discharge alive
Nyeri CRH	2010	0.33	28/02/2010	Yes	Negative	Negative	Negative			Discharge alive
Siaya CRH	2010	1.54	28/02/2010	Yes	Negative	Negative	Negative			Discharge alive
Siaya CRH	2010	1.36	28/02/2010	Yes	Negative	Negative	Negative			Discharge alive
Siaya CRH	2010	1.22	28/02/2010	Yes	Negative	Negative	Negative			Discharge alive
Siaya CRH	2010	0.08	28/02/2010	Yes	Negative	Negative	Negative			Discharge alive
Kenyatta NH	2010	4.5	01/03/2010	No						Unknown
Mombasa CRH	2010	0.5	01/03/2010	Yes	Negative	Negative	Negative			Unknown
Mombasa CRH	2010	0.67	01/03/2010	Yes	Negative	Negative	Negative			Unknown
Mombasa CRH	2010	0.5	01/03/2010	Yes	Negative	Negative	Negative			Unknown
Mombasa CRH	2010	1	01/03/2010	Yes	Negative	Negative	Negative			Unknown
Mombasa CRH	2010	1.25	01/03/2010	Yes	Negative	Negative	Negative			Unknown
Nakuru CRH	2010	2	01/03/2010	Yes	Negative	Negative	Negative			Unknown
Nakuru CRH	2010	0.75	01/03/2010	Yes	Negative	Negative	Negative			Unknown
Nyeri CRH	2010	0	01/03/2010	Yes	Negative	Negative	Negative			Discharge alive
Nyeri CRH	2010	0.75	01/03/2010	Yes	Negative	Negative	Negative			Discharge alive
Siaya CRH	2010	2.35	01/03/2010	Yes	Negative	Negative	Negative			Discharge alive
Siaya CRH	2010	1.14	01/03/2010	Yes	Negative	Negative	Negative			Discharge alive
Siaya CRH	2010	1.35	01/03/2010	Yes	Negative	Negative	Negative			Discharge alive
Siaya CRH	2010	1.63	01/03/2010	Yes	Negative	Negative	Negative			Discharge alive
Siaya CRH	2010	0.11	01/03/2010	Yes	Negative	Negative	Negative			Discharge alive
Siaya CRH	2010	1.58	02/03/2010	No	Negative	Negative				Discharge alive
Kakamega CRH	2010	3	02/03/2010	Yes	Negative	Negative	Negative			Discharge alive
Kakamega CRH	2010	5	02/03/2010	Yes	Negative	Negative	Negative			Discharge alive
Kakamega CRH	2010	0.5	02/03/2010	Yes	Negative	Negative	Negative			Discharge alive
Kakamega CRH	2010	2.75	02/03/2010	Yes	Negative	Negative	Negative			Discharge alive
Kakamega CRH	2010	17	02/03/2010	Yes	Negative	Negative	Negative			Discharge alive
Kakamega CRH	2010	34	02/03/2010	Yes	Negative	Negative	Negative			Discharge alive
Kenyatta NH	2010	1.17	02/03/2010	Yes	Negative	Negative	Negative			Unknown
Nakuru CRH	2010	2	02/03/2010	Yes	Negative	Negative	Negative			Unknown
Nyeri CRH	2010	1.17	02/03/2010	Yes	Negative	Negative	Negative			Discharge alive
Nyeri CRH	2010	0.5	02/03/2010	Yes	Negative	Negative	Negative			Discharge alive
Siaya CRH	2010	4.1	02/03/2010	Yes	Negative	Negative	Negative			Discharge alive
Siaya CRH	2010	2.68	02/03/2010	Yes	Negative	Negative	Negative			Discharge alive
Siaya CRH	2010	3.26	02/03/2010	Yes	Negative	Negative	Negative			Discharge alive
Siaya CRH	2010	0.66	02/03/2010	Yes	Negative	Negative	Negative			Discharge alive
Siaya CRH	2010	0.41	02/03/2010	Yes	Negative	Negative	Negative			Discharge alive
Siaya CRH	2010	0.14	03/03/2010	No	Negative	Negative				Discharge alive
Siaya CRH	2010	0.6	03/03/2010	No	Negative	Negative				Discharge alive
Nakuru CRH	2010	1.5	03/03/2010	No						Unknown
Kenyatta NH	2010	1	03/03/2010	Yes	Negative	Negative	Negative			Unknown
Nakuru CRH	2010	2	03/03/2010	Yes	Negative	Negative	Negative			Unknown
Nakuru CRH	2010	0.75	03/03/2010	Yes	Negative	Negative	Negative			Unknown
Nyeri CRH	2010	0.33	03/03/2010	Yes	Negative	Negative	Negative			Discharge alive
Nyeri CRH	2010	0.42	03/03/2010	Yes	Negative	Negative	Negative			Discharge alive
Nyeri CRH	2010	0.92	03/03/2010	Yes	Negative	Negative	Negative			Discharge alive
Siaya CRH	2010	0.6	03/03/2010	Yes	Negative	Negative	Negative			Discharge alive
Siaya CRH	2010	1.43	03/03/2010	Yes	Negative	Negative	Negative			Discharge alive
Siaya CRH	2010	3.14	03/03/2010	Yes	Negative	Negative	Negative			Discharge alive
Siaya CRH	2010	11.82	03/03/2010	Yes	Negative	Negative	Negative			Discharge alive
Kenyatta NH	2010	3	03/03/2010	Yes	Positive	Negative	Positive	No	No	Unknown
Kenyatta NH	2010	0.83	03/03/2010	Yes	Positive	Negative	Positive	No	No	Unknown
Kenyatta NH	2010	0.58	04/03/2010	No						Unknown
Kakamega CRH	2010	1.92	04/03/2010	Yes	Negative	Negative	Negative			Discharge alive
Mombasa CRH	2010	0.17	04/03/2010	Yes	Negative	Negative	Negative			Discharge alive
Nakuru CRH	2010	3	04/03/2010	Yes	Negative	Negative	Negative			Unknown
Nakuru CRH	2010	1.67	04/03/2010	Yes	Negative	Positive	Positive			Unknown
Nyeri CRH	2010	2	04/03/2010	Yes	Negative	Negative	Negative			Discharge alive
Siaya CRH	2010	0.52	04/03/2010	Yes	Negative	Negative	Negative			Discharge alive
Siaya CRH	2010	6.74	04/03/2010	Yes	Negative	Negative	Negative			Other
Siaya CRH	2010	0.84	04/03/2010	Yes	Negative	Negative	Negative			Discharge alive
Siaya CRH	2010	0.71	04/03/2010	Yes	Negative	Negative	Negative			Discharge alive
Siaya CRH	2010	0.15	04/03/2010	Yes	Negative	Positive	Positive			Discharge alive
Siaya CRH	2010	0.47	04/03/2010	Yes	Negative	Negative	Negative			Discharge alive
Siaya CRH	2010	0.51	05/03/2010	No	Negative	Negative				Unknown
Siaya CRH	2010	0.6	05/03/2010	No	Negative	Negative				Discharge alive
Kenyatta NH	2010	1.58	05/03/2010	No						Unknown
Nyeri CRH	2010	0.67	05/03/2010	No						Discharge alive
Kakamega CRH	2010	0.5	05/03/2010	Yes	Negative	Negative	Negative			Unknown
Kenyatta NH	2010	1.58	05/03/2010	Yes	Negative	Negative	Negative			Unknown
Kenyatta NH	2010	0.75	05/03/2010	Yes	Negative	Negative	Negative			Unknown
Kenyatta NH	2010	1.17	05/03/2010	Yes	Negative	Negative	Negative			Unknown
Kenyatta NH	2010	0.5	05/03/2010	Yes	Negative	Negative	Negative			Unknown
Mombasa CRH	2010	1.42	05/03/2010	Yes	Negative	Negative	Negative			Discharge alive
Mombasa CRH	2010	0.75	05/03/2010	Yes	Negative	Negative	Negative			Discharge alive
Nakuru CRH	2010	5	05/03/2010	Yes	Negative	Negative	Negative			Unknown
Nakuru CRH	2010	1.33	05/03/2010	Yes	Negative	Negative	Negative			Unknown
Nakuru CRH	2010	1.17	05/03/2010	Yes	Negative	Negative	Negative			Unknown
Nakuru CRH	2010	1.17	05/03/2010	Yes	Negative	Negative	Negative			Unknown
Nakuru CRH	2010	1	05/03/2010	Yes	Negative	Negative	Negative			Unknown
Siaya CRH	2010	35.78	05/03/2010	Yes	Negative	Negative	Negative			Discharge alive
Siaya CRH	2010	0.79	05/03/2010	Yes	Negative	Negative	Negative			Discharge alive
Siaya CRH	2010	1.34	05/03/2010	Yes	Negative	Negative	Negative			Discharge alive
Siaya CRH	2010	3.67	05/03/2010	Yes	Negative	Negative	Negative			Discharge alive
Kakamega CRH	2010	1.83	06/03/2010	Yes	Negative	Negative	Negative			Discharge alive
Kakamega CRH	2010	3.5	06/03/2010	Yes	Negative	Negative	Negative			Discharge alive
Kakamega CRH	2010	2	06/03/2010	Yes	Negative	Negative	Negative			Discharge alive
Kakamega CRH	2010	0.83	06/03/2010	Yes	Negative	Negative	Negative			Discharge alive
Mombasa CRH	2010	1.5	06/03/2010	Yes	Negative	Negative	Negative			Discharge alive
Mombasa CRH	2010	1	06/03/2010	Yes	Negative	Negative	Negative			Discharge alive
Nakuru CRH	2010	0.42	06/03/2010	Yes	Negative	Negative	Negative			Unknown
Nakuru CRH	2010	0.5	06/03/2010	Yes	Negative	Negative	Negative			Unknown
Nakuru CRH	2010	2	06/03/2010	Yes	Negative	Negative	Negative			Unknown
Nakuru CRH	2010	0.75	06/03/2010	Yes	Negative	Negative	Negative			Unknown
Nakuru CRH	2010	0.83	06/03/2010	Yes	Negative	Negative	Negative			Unknown
Nakuru CRH	2010	1.83	06/03/2010	Yes	Negative	Negative	Negative			Unknown
Nakuru CRH	2010	4	06/03/2010	Yes	Negative	Negative	Negative			Unknown
Nyeri CRH	2010	0.33	06/03/2010	Yes	Negative	Negative	Negative			Discharge alive
Nyeri CRH	2010	1.92	06/03/2010	Yes	Negative	Negative	Negative			Discharge alive
Nyeri CRH	2010	0.5	06/03/2010	Yes	Negative	Negative	Negative			Discharge alive
Nyeri CRH	2010	0.5	06/03/2010	Yes	Negative	Negative	Negative			Discharge alive
Siaya CRH	2010	15.73	06/03/2010	Yes	Negative	Negative	Negative			Discharge alive
Siaya CRH	2010	1.72	06/03/2010	Yes	Negative	Negative	Negative			Discharge alive
Siaya CRH	2010	4.32	06/03/2010	Yes	Negative	Negative	Negative			Discharge alive
Kenyatta NH	2010	1.17	07/03/2010	No						Unknown
Kenyatta NH	2010	0.67	07/03/2010	No						Unknown
Kakamega CRH	2010	5	07/03/2010	Yes	Negative	Negative	Negative			Discharge alive
Kakamega CRH	2010	4	07/03/2010	Yes	Negative	Negative	Negative			Discharge alive
Mombasa CRH	2010	1	07/03/2010	Yes	Negative	Negative	Negative			Discharge alive
Nakuru CRH	2010	2	07/03/2010	Yes	Negative	Negative	Negative			Unknown
Nyeri CRH	2010	2	07/03/2010	Yes	Negative	Negative	Negative			Discharge alive
Siaya CRH	2010	1.19	07/03/2010	Yes	Negative	Negative	Negative			Discharge alive
Siaya CRH	2010	0.58	07/03/2010	Yes	Negative	Negative	Negative			Discharge alive
Siaya CRH	2010	0.79	07/03/2010	Yes	Negative	Negative	Negative			Discharge alive
Siaya CRH	2010	0.22	07/03/2010	Yes	Negative	Negative	Negative			Discharge alive
Siaya CRH	2010	2.6	08/03/2010	No	Negative	Negative				Died
Kenyatta NH	2010	0.5	08/03/2010	Yes	Negative	Negative	Negative			Unknown
Mombasa CRH	2010	1.33	08/03/2010	Yes	Negative	Negative	Negative			Discharge alive
Mombasa CRH	2010	0.75	08/03/2010	Yes	Negative	Negative	Negative			Discharge alive
Nakuru CRH	2010	2.33	08/03/2010	Yes	Negative	Negative	Negative			Unknown
Nakuru CRH	2010	2.17	08/03/2010	Yes	Negative	Negative	Negative			Unknown
Nakuru CRH	2010	1.83	08/03/2010	Yes	Negative	Negative	Negative			Unknown
Siaya CRH	2010	2.48	08/03/2010	Yes	Negative	Negative	Negative			Discharge alive
Siaya CRH	2010	1.7	08/03/2010	Yes	Negative	Negative	Negative			Discharge alive
Siaya CRH	2010	13.14	08/03/2010	Yes	Negative	Negative	Negative			Discharge alive
Siaya CRH	2010	1.55	08/03/2010	Yes	Positive	Negative	Positive	No	No	Discharge alive
Kenyatta NH	2010	0.33	09/03/2010	No						Unknown
Kenyatta NH	2010	0.33	09/03/2010	No						Unknown
Nyeri CRH	2010	1.17	09/03/2010	No						Discharge alive
Nyeri CRH	2010	1.67	09/03/2010	No						Discharge alive
Kenyatta NH	2010	1.67	09/03/2010	Yes	Negative	Negative	Negative			Unknown
Kenyatta NH	2010	2.67	09/03/2010	Yes	Negative	Negative	Negative			Unknown
Kenyatta NH	2010	1.83	09/03/2010	Yes	Negative	Negative	Negative			Unknown
Siaya CRH	2010	1.11	09/03/2010	Yes	Negative	Negative	Negative			Discharge alive
Siaya CRH	2010	1.24	09/03/2010	Yes	Negative	Negative	Negative			Discharge alive
Siaya CRH	2010	0.5	09/03/2010	Yes	Negative	Negative	Negative			Discharge alive
Kakamega CRH	2010	34	09/03/2010	Yes	Positive	Negative	Positive	No	No	Discharge alive
Nyeri CRH	2010	1.33	09/03/2010	Yes	Positive	Negative	Positive	No	No	Discharge alive
Siaya CRH	2010	1.44	09/03/2010	Yes	Positive	Negative	Positive	No	Yes	Discharge alive
Kenyatta NH	2010	1.67	10/03/2010	No						Unknown
Kakamega CRH	2010	4	10/03/2010	Yes	Negative	Negative	Negative			Unknown
Kakamega CRH	2010	5	10/03/2010	Yes	Negative	Negative	Negative			Discharge alive
Kenyatta NH	2010	2.5	10/03/2010	Yes	Negative	Negative	Negative			Unknown
Kenyatta NH	2010	0.25	10/03/2010	Yes	Negative	Negative	Negative			Unknown
Kenyatta NH	2010	1.33	10/03/2010	Yes	Negative	Negative	Negative			Unknown
Kenyatta NH	2010	1.17	10/03/2010	Yes	Negative	Negative	Negative			Unknown
Nakuru CRH	2010	2.08	10/03/2010	Yes	Negative	Negative	Negative			Unknown
Nakuru CRH	2010	1.33	10/03/2010	Yes	Negative	Negative	Negative			Unknown
Nakuru CRH	2010	0.5	10/03/2010	Yes	Negative	Negative	Negative			Unknown
Nyeri CRH	2010	2	10/03/2010	Yes	Negative	Negative	Negative			Discharge alive
Nyeri CRH	2010	0.25	10/03/2010	Yes	Negative	Negative	Negative			Unknown
Siaya CRH	2010	4.78	10/03/2010	Yes	Negative	Negative	Negative			Discharge alive
Siaya CRH	2010	0.14	10/03/2010	Yes	Negative	Negative	Negative			Discharge alive
Siaya CRH	2010	0.63	10/03/2010	Yes	Negative	Negative	Negative			Discharge alive
Siaya CRH	2010	1.04	10/03/2010	Yes	Negative	Negative	Negative			Discharge alive
Siaya CRH	2010	5.83	10/03/2010	Yes	Negative	Negative	Negative			Discharge alive
Siaya CRH	2010	1.68	10/03/2010	Yes	Negative	Negative	Negative			Discharge alive
Siaya CRH	2010	1.8	10/03/2010	Yes	Negative	Negative	Negative			Discharge alive
Kakamega CRH	2010	1.75	11/03/2010	Yes	Negative	Negative	Negative			Discharge alive
Kakamega CRH	2010	0.75	11/03/2010	Yes	Negative	Negative	Negative			Discharge alive
Mombasa CRH	2010	1.25	11/03/2010	Yes	Negative	Negative	Negative			Unknown
Mombasa CRH	2010	1.83	11/03/2010	Yes	Negative	Negative	Negative			Unknown
Nakuru CRH	2010	0.25	11/03/2010	Yes	Negative	Negative	Negative			Unknown
Nakuru CRH	2010	0.5	11/03/2010	Yes	Negative	Negative	Negative			Unknown
Siaya CRH	2010	3.01	11/03/2010	Yes	Negative	Negative	Negative			Discharge alive
Nakuru CRH	2010	1.08	11/03/2010	Yes	Positive	Negative	Positive	No	No	Unknown
Nyeri CRH	2010	1	11/03/2010	Yes	Positive	Negative	Positive	No	No	Discharge alive
Kenyatta NH	2010	0.25	12/03/2010	No						Unknown
Kenyatta NH	2010	1	12/03/2010	No						Unknown
Kakamega CRH	2010	6	12/03/2010	Yes	Negative	Negative	Negative			Discharge alive
Kakamega CRH	2010	1.33	12/03/2010	Yes	Negative	Negative	Negative			Discharge alive
Kenyatta NH	2010	1.25	12/03/2010	Yes	Negative	Negative	Negative			Unknown
Mombasa CRH	2010	0.5	12/03/2010	Yes	Negative	Negative	Negative			Unknown
Nyeri CRH	2010	0.5	12/03/2010	Yes	Negative	Negative	Negative			Discharge alive
Nyeri CRH	2010	4	12/03/2010	Yes	Negative	Negative	Negative			Unknown
Siaya CRH	2010	0.67	12/03/2010	Yes	Negative	Negative	Negative			Discharge alive
Siaya CRH	2010	0.3	12/03/2010	Yes	Negative	Negative	Negative			Discharge alive
Siaya CRH	2010	0.56	12/03/2010	Yes	Negative	Negative	Negative			Discharge alive
Kakamega CRH	2010	5.5	13/03/2010	Yes	Negative	Negative	Negative			Discharge alive
Kakamega CRH	2010	5	13/03/2010	Yes	Negative	Negative	Negative			Discharge alive
Mombasa CRH	2010	1.33	13/03/2010	Yes	Negative	Negative	Negative			Unknown
Nyeri CRH	2010	1.67	13/03/2010	Yes	Negative	Negative	Negative			Discharge alive
Nyeri CRH	2010	1.67	13/03/2010	Yes	Negative	Negative	Negative			Discharge alive
Nyeri CRH	2010	0.67	13/03/2010	Yes	Negative	Negative	Negative			Discharge alive
Siaya CRH	2010	0.93	13/03/2010	Yes	Negative	Negative	Negative			Discharge alive
Siaya CRH	2010	1.59	13/03/2010	Yes	Negative	Negative	Negative			Discharge alive
Siaya CRH	2010	1.83	13/03/2010	Yes	Negative	Negative	Negative			Discharge alive
Siaya CRH	2010	9.75	13/03/2010	Yes	Negative	Negative	Negative			Discharge alive
Siaya CRH	2010	0.96	14/03/2010	No	Negative	Negative				Discharge alive
Siaya CRH	2010	0.38	14/03/2010	No	Negative	Negative				Discharge alive
Kakamega CRH	2010	1.33	14/03/2010	Yes	Negative	Negative	Negative			Discharge alive
Mombasa CRH	2010	1.67	14/03/2010	Yes	Negative	Negative	Negative			Unknown
Mombasa CRH	2010	1.33	14/03/2010	Yes	Negative	Negative	Negative			Unknown
Nakuru CRH	2010	1.25	14/03/2010	Yes	Negative	Negative	Negative			Unknown
Nyeri CRH	2010	1	14/03/2010	Yes	Negative	Negative	Negative			Unknown
Siaya CRH	2010	75.78	14/03/2010	Yes	Negative	Negative	Negative			Discharge alive
Siaya CRH	2010	2.4	14/03/2010	Yes	Negative	Negative	Negative			Discharge alive
Siaya CRH	2010	0.63	14/03/2010	Yes	Negative	Negative	Negative			Discharge alive
Siaya CRH	2010	1.24	14/03/2010	Yes	Negative	Negative	Negative			Unknown
Siaya CRH	2010	0.13	14/03/2010	Yes	Negative	Positive	Positive			Discharge alive
Siaya CRH	2010	4.19	14/03/2010	Yes	Negative	Negative	Negative			Discharge alive
Siaya CRH	2010	4.12	14/03/2010	Yes	Negative	Negative	Negative			Discharge alive
Nakuru CRH	2010	1.08	15/03/2010	No						Unknown
Kakamega CRH	2010	3.5	15/03/2010	Yes	Negative	Negative	Negative			Discharge alive
Kakamega CRH	2010	44	15/03/2010	Yes	Negative	Negative	Negative			Discharge alive
Kakamega CRH	2010	1.67	15/03/2010	Yes	Negative	Negative	Negative			Discharge alive
Kenyatta NH	2010	0.5	15/03/2010	Yes	Negative	Negative	Negative			Unknown
Kenyatta NH	2010	0.67	15/03/2010	Yes	Negative	Negative	Negative			Unknown
Mombasa CRH	2010	1.83	15/03/2010	Yes	Negative	Negative	Negative			Unknown
Nakuru CRH	2010	0.33	15/03/2010	Yes	Negative	Negative	Negative			Unknown
Nakuru CRH	2010	2.08	15/03/2010	Yes	Negative	Negative	Negative			Unknown
Nyeri CRH	2010	4.17	15/03/2010	Yes	Negative	Negative	Negative			Discharge alive
Nyeri CRH	2010	1.17	15/03/2010	Yes	Negative	Negative	Negative			Discharge alive
Siaya CRH	2010	19.43	15/03/2010	Yes	Negative	Negative	Negative			Discharge alive
Siaya CRH	2010	0.22	15/03/2010	Yes	Negative	Negative	Negative			Discharge alive
Siaya CRH	2010	2.35	15/03/2010	Yes	Negative	Negative	Negative			Discharge alive
Siaya CRH	2010	1.83	15/03/2010	Yes	Negative	Negative	Negative			Discharge alive
Siaya CRH	2010	0.42	15/03/2010	Yes	Negative	Negative	Negative			Discharge alive
Siaya CRH	2010	0.64	15/03/2010	Yes	Negative	Negative	Negative			Discharge alive
Siaya CRH	2010	0.76	15/03/2010	Yes	Negative	Negative	Negative			Discharge alive
Nakuru CRH	2010	0.5	16/03/2010	No						Unknown
Nyeri CRH	2010	1.67	16/03/2010	No						Discharge alive
Kakamega CRH	2010	5	16/03/2010	Yes	Negative	Negative	Negative			Discharge alive
Kakamega CRH	2010	1.75	16/03/2010	Yes	Negative	Negative	Negative			Discharge alive
Kakamega CRH	2010	1.5	16/03/2010	Yes	Negative	Negative	Negative			Unknown
Kenyatta NH	2010	2.33	16/03/2010	Yes	Negative	Negative	Negative			Unknown
Nyeri CRH	2010	0.67	16/03/2010	Yes	Negative	Negative	Negative			Discharge alive
Siaya CRH	2010	0.13	16/03/2010	Yes	Negative	Negative	Negative			Discharge alive
Siaya CRH	2010	1.64	16/03/2010	Yes	Negative	Negative	Negative			Discharge alive
Siaya CRH	2010	0.29	17/03/2010	No	Negative	Negative				Discharge alive
Kenyatta NH	2010	1.67	17/03/2010	No						Unknown
Kenyatta NH	2010	0.67	17/03/2010	Yes	Negative	Negative	Negative			Unknown
Kenyatta NH	2010	0.75	17/03/2010	Yes	Negative	Negative	Negative			Unknown
Kenyatta NH	2010	0.75	17/03/2010	Yes	Negative	Negative	Negative			Unknown
Nakuru CRH	2010	1.92	17/03/2010	Yes	Negative	Negative	Negative			Unknown
Nyeri CRH	2010	1.67	17/03/2010	Yes	Negative	Positive	Positive			Discharge alive
Siaya CRH	2010	0.27	17/03/2010	Yes	Negative	Negative	Negative			Discharge alive
Siaya CRH	2010	0.32	17/03/2010	Yes	Negative	Negative	Negative			Discharge alive
Siaya CRH	2010	0.68	18/03/2010	No	Negative	Negative				Died
Nyeri CRH	2010	1.17	18/03/2010	No						Discharge alive
Nyeri CRH	2010	1.33	18/03/2010	No						Discharge alive
Kenyatta NH	2010	0.33	18/03/2010	Yes	Negative	Negative	Negative			Unknown
Mombasa CRH	2010	1.75	18/03/2010	Yes	Negative	Negative	Negative			Unknown
Mombasa CRH	2010	0.83	18/03/2010	Yes	Negative	Negative	Negative			Unknown
Nakuru CRH	2010	2	18/03/2010	Yes	Negative	Negative	Negative			Unknown
Nyeri CRH	2010	0.67	18/03/2010	Yes	Negative	Negative	Negative			Discharge alive
Nyeri CRH	2010	0.75	18/03/2010	Yes	Negative	Negative	Negative			Unknown
Siaya CRH	2010	0.49	18/03/2010	Yes	Negative	Negative	Negative			Discharge alive
Siaya CRH	2010	0.3	18/03/2010	Yes	Negative	Negative	Negative			Discharge alive
Siaya CRH	2010	1.8	18/03/2010	Yes	Positive	Negative	Positive	No	No	Discharge alive
Nyeri CRH	2010	0.83	19/03/2010	No						Discharge alive
Nyeri CRH	2010	0.67	19/03/2010	No						Discharge alive
Kakamega CRH	2010	1.08	19/03/2010	Yes	Negative	Negative	Negative			Discharge alive
Kakamega CRH	2010	3	19/03/2010	Yes	Negative	Negative	Negative			Discharge alive
Kakamega CRH	2010	0.83	19/03/2010	Yes	Negative	Negative	Negative			Discharge alive
Mombasa CRH	2010	1.92	19/03/2010	Yes	Negative	Negative	Negative			Unknown
Mombasa CRH	2010	1.17	19/03/2010	Yes	Negative	Negative	Negative			Unknown
Mombasa CRH	2010	1.67	19/03/2010	Yes	Negative	Negative	Negative			Unknown
Nakuru CRH	2010	0.75	19/03/2010	Yes	Negative	Negative	Negative			Unknown
Nakuru CRH	2010	0.75	19/03/2010	Yes	Negative	Negative	Negative			Unknown
Nakuru CRH	2010	3.08	19/03/2010	Yes	Negative	Negative	Negative			Unknown
Nyeri CRH	2010	1.33	19/03/2010	Yes	Negative	Negative	Negative			Unknown
Nyeri CRH	2010	1.67	19/03/2010	Yes	Negative	Negative	Negative			Discharge alive
Nyeri CRH	2010	0.5	19/03/2010	Yes	Negative	Negative	Negative			Discharge alive
Nyeri CRH	2010	0.67	19/03/2010	Yes	Negative	Negative	Negative			Unknown
Nyeri CRH	2010	0.83	19/03/2010	Yes	Negative	Negative	Negative			Unknown
Siaya CRH	2010	3.01	19/03/2010	Yes	Negative	Negative	Negative			Discharge alive
Siaya CRH	2010	1.79	19/03/2010	Yes	Negative	Negative	Negative			Discharge alive
Siaya CRH	2010	1.71	19/03/2010	Yes	Negative	Negative	Negative			Discharge alive
Siaya CRH	2010	0.43	20/03/2010	No	Negative	Negative				Discharge alive
Kakamega CRH	2010	5	20/03/2010	No						Discharge alive
Kenyatta NH	2010	1.25	20/03/2010	No						Unknown
Kenyatta NH	2010	0.83	20/03/2010	No						Unknown
Kakamega CRH	2010	1.25	20/03/2010	Yes	Negative	Negative	Negative			Discharge alive
Kenyatta NH	2010	1.17	20/03/2010	Yes	Negative	Negative	Negative			Unknown
Mombasa CRH	2010	1.17	20/03/2010	Yes	Negative	Negative	Negative			Unknown
Mombasa CRH	2010	1	20/03/2010	Yes	Negative	Negative	Negative			Unknown
Mombasa CRH	2010	0.33	20/03/2010	Yes	Negative	Negative	Negative			Unknown
Mombasa CRH	2010	1.58	20/03/2010	Yes	Negative	Negative	Negative			Unknown
Mombasa CRH	2010	1.17	20/03/2010	Yes	Negative	Negative	Negative			Unknown
Nakuru CRH	2010	0.5	20/03/2010	Yes	Negative	Negative	Negative			Unknown
Nakuru CRH	2010	0.75	20/03/2010	Yes	Negative	Negative	Negative			Unknown
Nakuru CRH	2010	1.08	20/03/2010	Yes	Negative	Negative	Negative			Unknown
Nyeri CRH	2010	1.33	20/03/2010	Yes	Negative	Negative	Negative			Discharge alive
Siaya CRH	2010	0.08	20/03/2010	Yes	Negative	Negative	Negative			Discharge alive
Siaya CRH	2010	1.74	20/03/2010	Yes	Negative	Negative	Negative			Discharge alive
Siaya CRH	2010	1.68	21/03/2010	No	Negative	Negative				Discharge alive
Nyeri CRH	2010	1.83	21/03/2010	No						Discharge alive
Mombasa CRH	2010	1.5	21/03/2010	Yes	Negative	Negative	Negative			Unknown
Nakuru CRH	2010	1.17	21/03/2010	Yes	Negative	Negative	Negative			Unknown
Nakuru CRH	2010	0.83	21/03/2010	Yes	Negative	Negative	Negative			Unknown
Siaya CRH	2010	8.63	21/03/2010	Yes	Negative	Negative	Negative			Discharge alive
Siaya CRH	2010	1.56	22/03/2010	No	Negative	Negative				Discharge alive
Siaya CRH	2010	0.23	22/03/2010	No	Negative	Negative				Discharge alive
Siaya CRH	2010	1.52	22/03/2010	No	Negative	Negative				Discharge alive
Siaya CRH	2010	0.82	22/03/2010	No	Negative	Negative				Discharge alive
Nakuru CRH	2010	1.25	22/03/2010	No						Unknown
Nakuru CRH	2010	1.17	22/03/2010	No						Unknown
Nyeri CRH	2010	1.33	22/03/2010	No						Discharge alive
Nyeri CRH	2010	1.25	22/03/2010	No						Discharge alive
Kenyatta NH	2010	1.33	22/03/2010	Yes	Negative	Negative	Negative			Unknown
Mombasa CRH	2010	2.08	22/03/2010	Yes	Negative	Negative	Negative			Unknown
Mombasa CRH	2010	1.25	22/03/2010	Yes	Negative	Negative	Negative			Unknown
Mombasa CRH	2010	0.83	22/03/2010	Yes	Negative	Negative	Negative			Unknown
Nakuru CRH	2010	2	22/03/2010	Yes	Negative	Negative	Negative			Unknown
Nyeri CRH	2010	1.17	22/03/2010	Yes	Negative	Negative	Negative			Discharge alive
Nyeri CRH	2010	1	22/03/2010	Yes	Negative	Negative	Negative			Discharge alive
Nyeri CRH	2010	3	22/03/2010	Yes	Negative	Negative	Negative			Discharge alive
Nyeri CRH	2010	2	22/03/2010	Yes	Negative	Negative	Negative			Unknown
Siaya CRH	2010	0.64	22/03/2010	Yes	Negative	Negative	Negative			Discharge alive
Siaya CRH	2010	4.89	22/03/2010	Yes	Negative	Negative	Negative			Discharge alive
Siaya CRH	2010	4.5	22/03/2010	Yes	Negative	Positive	Positive			Discharge alive
Siaya CRH	2010	0.61	23/03/2010	No	Negative	Negative				Discharge alive
Kakamega CRH	2010	4	23/03/2010	No						Discharge alive
Mombasa CRH	2010	2	23/03/2010	Yes	Negative	Negative	Negative			Unknown
Nyeri CRH	2010	2.17	23/03/2010	Yes	Negative	Negative	Negative			Unknown
Siaya CRH	2010	24.77	23/03/2010	Yes	Negative	Negative	Negative			Discharge alive
Siaya CRH	2010	3.29	23/03/2010	Yes	Negative	Negative	Negative			Discharge alive
Siaya CRH	2010	0.24	23/03/2010	Yes	Negative	Negative	Negative			Discharge alive
Siaya CRH	2010	9.98	23/03/2010	Yes	Negative	Negative	Negative			Discharge alive
Kenyatta NH	2010	1.17	24/03/2010	Yes	Negative	Negative	Negative			Unknown
Kenyatta NH	2010	1.25	24/03/2010	Yes	Negative	Negative	Negative			Unknown
Nyeri CRH	2010	0.75	24/03/2010	Yes	Negative	Negative	Negative			Discharge alive
Siaya CRH	2010	35.35	24/03/2010	Yes	Negative	Negative	Negative			Discharge alive
Siaya CRH	2010	2.69	24/03/2010	Yes	Negative	Negative	Negative			Discharge alive
Siaya CRH	2010	2.63	24/03/2010	Yes	Negative	Negative	Negative			Discharge alive
Siaya CRH	2010	3.68	24/03/2010	Yes	Negative	Negative	Negative			Discharge alive
Kakamega CRH	2010	2.92	25/03/2010	No						Discharge alive
Nakuru CRH	2010	0.33	25/03/2010	No						Unknown
Nakuru CRH	2010	1.25	25/03/2010	No						Unknown
Nyeri CRH	2010	1.17	25/03/2010	No						Unknown
Nyeri CRH	2010	0.83	25/03/2010	No						Unknown
Nyeri CRH	2010	1.33	25/03/2010	No						Unknown
Siaya CRH	2010	29.79	25/03/2010	Yes	Negative	Negative	Negative			Discharge alive
Siaya CRH	2010	0.9	25/03/2010	Yes	Negative	Negative	Negative			Discharge alive
Siaya CRH	2010	0.57	25/03/2010	Yes	Negative	Negative	Negative			Discharge alive
Siaya CRH	2010	0.7	25/03/2010	Yes	Negative	Negative	Negative			Discharge alive
Mombasa CRH	2010	0.75	26/03/2010	No						Unknown
Nakuru CRH	2010	4	26/03/2010	No						Unknown
Nakuru CRH	2010	1.17	26/03/2010	No						Unknown
Nakuru CRH	2010	0.75	26/03/2010	No						Unknown
Nyeri CRH	2010	1.67	26/03/2010	No						Unknown
Nyeri CRH	2010	1.08	26/03/2010	No						Unknown
Nakuru CRH	2010	0.67	26/03/2010	Yes	Negative	Negative	Negative			Unknown
Siaya CRH	2010	1.98	26/03/2010	Yes	Negative	Negative	Negative			Discharge alive
Mombasa CRH	2010	0.5	27/03/2010	Yes	Negative	Negative	Negative			Unknown
Mombasa CRH	2010	2.67	27/03/2010	Yes	Negative	Negative	Negative			Unknown
Siaya CRH	2010	0.57	27/03/2010	Yes	Negative	Negative	Negative			Discharge alive
Siaya CRH	2010	0.28	27/03/2010	Yes	Negative	Negative	Negative			Discharge alive
Siaya CRH	2010	1.12	27/03/2010	Yes	Negative	Negative	Negative			Discharge alive
Mombasa CRH	2010	1.25	27/03/2010	Yes	Positive	Negative	Positive	No	Yes	Unknown
Siaya CRH	2010	0.17	28/03/2010	No	Negative	Negative				Discharge alive
Kakamega CRH	2010	1.33	28/03/2010	No						Discharge alive
Nakuru CRH	2010	0.75	28/03/2010	No						Unknown
Nakuru CRH	2010	0.25	28/03/2010	No						Unknown
Siaya CRH	2010	0.63	28/03/2010	Yes	Negative	Negative	Negative			Discharge alive
Siaya CRH	2010	0.13	28/03/2010	Yes	Negative	Negative	Negative			Discharge alive
Siaya CRH	2010	0.47	28/03/2010	Yes	Negative	Negative	Negative			Discharge alive
Siaya CRH	2010	0.67	28/03/2010	Yes	Negative	Negative	Negative			Discharge alive
Siaya CRH	2010	1.96	28/03/2010	Yes	Negative	Negative	Negative			Discharge alive
Nakuru CRH	2010	2.17	29/03/2010	No						Unknown
Siaya CRH	2010	0.31	29/03/2010	Yes	Negative	Negative	Negative			Discharge alive
Siaya CRH	2010	3.5	30/03/2010	No	Negative	Negative				Died
Siaya CRH	2010	0.62	30/03/2010	No	Negative	Negative				Died
Kakamega CRH	2010	3	30/03/2010	Yes	Negative	Negative	Negative			Discharge alive
Siaya CRH	2010	0.17	30/03/2010	Yes	Negative	Negative	Negative			Discharge alive
Kenyatta NH	2010	2	31/03/2010	No						Unknown
Nakuru CRH	2010	1.17	31/03/2010	No						Unknown
Siaya CRH	2010	30.81	31/03/2010	Yes	Negative	Negative	Negative			Discharge alive
Siaya CRH	2010	36.81	31/03/2010	Yes	Negative	Negative	Negative			Discharge alive
Siaya CRH	2010	0.66	31/03/2010	Yes	Negative	Negative	Negative			Discharge alive
Siaya CRH	2010	0.12	31/03/2010	Yes	Negative	Negative	Negative			Discharge alive
Siaya CRH	2010	0.72	31/03/2010	Yes	Negative	Negative	Negative			Discharge alive
Siaya CRH	2010	0.29	01/04/2010	No	Negative	Negative				Died
Siaya CRH	2010	0.51	01/04/2010	Yes	Negative	Negative	Negative			Discharge alive
Kakamega CRH	2010	1.33	02/04/2010	No						Discharge alive
Siaya CRH	2010	0.74	02/04/2010	Yes	Negative	Positive	Positive			Discharge alive
Siaya CRH	2010	3.13	02/04/2010	Yes	Negative	Negative	Negative			Discharge alive
Nakuru CRH	2010	0.67	03/04/2010	No						Unknown
Kakamega CRH	2010	3	03/04/2010	Yes	Negative	Negative	Negative			Unknown
Kakamega CRH	2010	2	03/04/2010	Yes	Negative	Negative	Negative			Unknown
Siaya CRH	2010	0.32	03/04/2010	Yes	Negative	Negative	Negative			Discharge alive
Siaya CRH	2010	2.75	03/04/2010	Yes	Negative	Negative	Negative			Discharge alive
Siaya CRH	2010	2.67	03/04/2010	Yes	Negative	Negative	Negative			Discharge alive
Siaya CRH	2010	1.45	03/04/2010	Yes	Negative	Negative	Negative			Discharge alive
Siaya CRH	2010	0.47	03/04/2010	Yes	Positive	Negative	Positive	Yes	No	Discharge alive
Nakuru CRH	2010	0.75	04/04/2010	No						Unknown
Kakamega CRH	2010	2.25	04/04/2010	Yes	Negative	Negative	Negative			Discharge alive
Siaya CRH	2010	25.32	04/04/2010	Yes	Negative	Positive	Positive			Discharge alive
Siaya CRH	2010	2.48	04/04/2010	Yes	Negative	Positive	Positive			Discharge alive
Siaya CRH	2010	0.96	04/04/2010	Yes	Negative	Negative	Negative			Discharge alive
Siaya CRH	2010	3.27	04/04/2010	Yes	Negative	Negative	Negative			Discharge alive
Kakamega CRH	2010	1.25	05/04/2010	No						Discharge alive
Nyeri CRH	2010	2	05/04/2010	No						Unknown
Kakamega CRH	2010	1.17	05/04/2010	Yes	Negative	Negative	Negative			Discharge alive
Siaya CRH	2010	0.52	05/04/2010	Yes	Negative	Negative	Negative			Died
Siaya CRH	2010	0.64	05/04/2010	Yes	Negative	Negative	Negative			Discharge alive
Siaya CRH	2010	0.83	05/04/2010	Yes	Negative	Negative	Negative			Discharge alive
Siaya CRH	2010	0.53	05/04/2010	Yes	Negative	Negative	Negative			Discharge alive
Kakamega CRH	2010	0.67	06/04/2010	No						Discharge alive
Mombasa CRH	2010	2.5	06/04/2010	No						Unknown
Siaya CRH	2010	3.95	06/04/2010	Yes	Negative	Negative	Negative			Discharge alive
Siaya CRH	2010	0.7	06/04/2010	Yes	Negative	Negative	Negative			Discharge alive
Siaya CRH	2010	0.58	06/04/2010	Yes	Negative	Negative	Negative			Discharge alive
Siaya CRH	2010	0.9	06/04/2010	Yes	Negative	Negative	Negative			Discharge alive
Siaya CRH	2010	7.58	07/04/2010	No	Negative	Negative				Discharge alive
Siaya CRH	2010	0.52	07/04/2010	No	Negative	Negative				Discharge alive
Kakamega CRH	2010	1.75	07/04/2010	No						Discharge alive
Kakamega CRH	2010	3.5	07/04/2010	No						Discharge alive
Kakamega CRH	2010	0.75	07/04/2010	No						Discharge alive
Kakamega CRH	2010	1.83	07/04/2010	No						Discharge alive
Nakuru CRH	2010	0.5	07/04/2010	No						Unknown
Nyeri CRH	2010	1.5	07/04/2010	No						Unknown
Nyeri CRH	2010	1.42	07/04/2010	No						Unknown
Siaya CRH	2010	46.76	07/04/2010	Yes	Negative	Negative	Negative			Discharge alive
Siaya CRH	2010	0.5	07/04/2010	Yes	Negative	Negative	Negative			Discharge alive
Siaya CRH	2010	0.59	07/04/2010	Yes	Negative	Negative	Negative			Discharge alive
Siaya CRH	2010	0.81	07/04/2010	Yes	Negative	Negative	Negative			Discharge alive
Siaya CRH	2010	0.38	07/04/2010	Yes	Negative	Negative	Negative			Discharge alive
Kakamega CRH	2010	1.83	08/04/2010	No						Discharge alive
Kakamega CRH	2010	1.5	08/04/2010	No						Discharge alive
Kakamega CRH	2010	0.75	08/04/2010	Yes	Negative	Negative	Negative			Unknown
Nakuru CRH	2010	1	08/04/2010	Yes	Negative	Negative	Negative			Unknown
Siaya CRH	2010	1.63	08/04/2010	Yes	Negative	Negative	Negative			Discharge alive
Kakamega CRH	2010	3	09/04/2010	No						Unknown
Kakamega CRH	2010	2.67	09/04/2010	Yes	Negative	Negative	Negative			Discharge alive
Nakuru CRH	2010	1.33	09/04/2010	Yes	Negative	Negative	Negative			Unknown
Nakuru CRH	2010	1.67	09/04/2010	Yes	Negative	Negative	Negative			Unknown
Siaya CRH	2010	0.79	09/04/2010	Yes	Negative	Negative	Negative			Discharge alive
Siaya CRH	2010	0.46	09/04/2010	Yes	Negative	Negative	Negative			Discharge alive
Siaya CRH	2010	0.31	09/04/2010	Yes	Negative	Negative	Negative			Discharge alive
Siaya CRH	2010	1.71	09/04/2010	Yes	Negative	Negative	Negative			Discharge alive
Siaya CRH	2010	0.19	09/04/2010	Yes	Negative	Negative	Negative			Discharge alive
Kakamega CRH	2010	0.67	09/04/2010	Yes	Positive	Negative	Positive	No	No	Discharge alive
Siaya CRH	2010	0.51	10/04/2010	No	Negative	Negative				Discharge alive
Mombasa CRH	2010	0.5	10/04/2010	No						Unknown
Nyeri CRH	2010	1.17	10/04/2010	No						Unknown
Kakamega CRH	2010	2	10/04/2010	Yes	Negative	Negative	Negative			Discharge alive
Kakamega CRH	2010	0.5	10/04/2010	Yes	Negative	Negative	Negative			Discharge alive
Mombasa CRH	2010	0.5	10/04/2010	Yes	Negative	Negative	Negative			Unknown
Mombasa CRH	2010	0.75	10/04/2010	Yes	Negative	Negative	Negative			Unknown
Siaya CRH	2010	2.53	10/04/2010	Yes	Negative	Negative	Negative			Discharge alive
Siaya CRH	2010	5.14	10/04/2010	Yes	Negative	Negative	Negative			Discharge alive
Siaya CRH	2010	0.16	10/04/2010	Yes	Negative	Negative	Negative			Discharge alive
Siaya CRH	2010	0.93	10/04/2010	Yes	Positive	Negative	Positive	No	No	Discharge alive
Kakamega CRH	2010	1.17	11/04/2010	Yes	Negative	Negative	Negative			Discharge alive
Kakamega CRH	2010	2.5	11/04/2010	Yes	Negative	Negative	Negative			Unknown
Nakuru CRH	2010	1.58	11/04/2010	Yes	Negative	Negative	Negative			Unknown
Nakuru CRH	2010	1.33	11/04/2010	Yes	Negative	Negative	Negative			Unknown
Nakuru CRH	2010	0.83	11/04/2010	Yes	Negative	Negative	Negative			Unknown
Nakuru CRH	2010	1.17	11/04/2010	Yes	Negative	Negative	Negative			Unknown
Nakuru CRH	2010	1.83	11/04/2010	Yes	Negative	Negative	Negative			Unknown
Siaya CRH	2010	5.99	11/04/2010	Yes	Negative	Negative	Negative			Discharge alive
Siaya CRH	2010	3.01	11/04/2010	Yes	Negative	Negative	Negative			Discharge alive
Siaya CRH	2010	0.28	11/04/2010	Yes	Negative	Negative	Negative			Discharge alive
Mombasa CRH	2010	0.67	11/04/2010	Yes	Positive	Negative	Positive	No	Yes	Unknown
Mombasa CRH	2010	0.83	12/04/2010	No						Unknown
Kakamega CRH	2010	1.5	12/04/2010	Yes	Negative	Negative	Negative			Discharge alive
Kakamega CRH	2010	5	12/04/2010	Yes	Negative	Negative	Negative			Unknown
Nakuru CRH	2010	0.5	12/04/2010	Yes	Negative	Negative	Negative			Unknown
Siaya CRH	2010	2.5	12/04/2010	Yes	Negative	Negative	Negative			Discharge alive
Mombasa CRH	2010	1.33	12/04/2010	Yes	Positive	Negative	Positive	No	Yes	Unknown
Mombasa CRH	2010	0.5	13/04/2010	No						Unknown
Mombasa CRH	2010	1.83	13/04/2010	No						Unknown
Siaya CRH	2010	0.57	13/04/2010	Yes	Negative	Negative	Negative			Discharge alive
Siaya CRH	2010	4.34	13/04/2010	Yes	Negative	Negative	Negative			Discharge alive
Siaya CRH	2010	0.78	13/04/2010	Yes	Negative	Negative	Negative			Discharge alive
Kenyatta NH	2010	0.5	14/04/2010	No						Unknown
Kakamega CRH	2010	3.5	14/04/2010	Yes	Negative	Negative	Negative			Discharge alive
Siaya CRH	2010	0.44	14/04/2010	Yes	Negative	Negative	Negative			Unknown
Siaya CRH	2010	0.39	14/04/2010	Yes	Negative	Negative	Negative			Discharge alive
Siaya CRH	2010	1.58	14/04/2010	Yes	Negative	Negative	Negative			Discharge alive
Siaya CRH	2010	0.9	15/04/2010	No	Negative	Negative				Discharge alive
Kakamega CRH	2010	1.58	15/04/2010	Yes	Negative	Negative	Negative			Unknown
Kakamega CRH	2010	34.08	15/04/2010	Yes	Negative	Negative	Negative			Unknown
Kakamega CRH	2010	36	15/04/2010	Yes	Negative	Negative	Negative			Unknown
Nyeri CRH	2010	0.83	15/04/2010	Yes	Negative	Negative	Negative			Unknown
Siaya CRH	2010	1.91	15/04/2010	Yes	Negative	Negative	Negative			Discharge alive
Siaya CRH	2010	0.51	15/04/2010	Yes	Negative	Negative	Negative			Discharge alive
Siaya CRH	2010	0.88	15/04/2010	Yes	Negative	Negative	Negative			Discharge alive
Mombasa CRH	2010	0.5	16/04/2010	No						Unknown
Mombasa CRH	2010	0.25	16/04/2010	No						Unknown
Mombasa CRH	2010	0.5	16/04/2010	No						Unknown
Kakamega CRH	2010	3.5	16/04/2010	Yes	Negative	Negative	Negative			Unknown
Nyeri CRH	2010	19	16/04/2010	Yes	Negative	Negative	Negative			Unknown
Siaya CRH	2010	2.76	16/04/2010	Yes	Negative	Negative	Negative			Discharge alive
Siaya CRH	2010	0.65	16/04/2010	Yes	Negative	Negative	Negative			Discharge alive
Siaya CRH	2010	0.19	16/04/2010	Yes	Negative	Negative	Negative			Discharge alive
Siaya CRH	2010	0.67	16/04/2010	Yes	Negative	Negative	Negative			Discharge alive
Siaya CRH	2010	1.74	17/04/2010	No	Negative	Negative				Died
Mombasa CRH	2010	0.75	17/04/2010	No						Unknown
Siaya CRH	2010	1.98	17/04/2010	Yes	Negative	Negative	Negative			Discharge alive
Siaya CRH	2010	0.38	17/04/2010	Yes	Negative	Negative	Negative			Discharge alive
Siaya CRH	2010	1.25	17/04/2010	Yes	Negative	Negative	Negative			Discharge alive
Kakamega CRH	2010	0.75	17/04/2010	Yes	Positive	Negative	Positive	No	No	Unknown
Kenyatta NH	2010	0.83	18/04/2010	No						Unknown
Kenyatta NH	2010	1.67	18/04/2010	No						Unknown
Kenyatta NH	2010	1.33	18/04/2010	No						Unknown
Mombasa CRH	2010	1	18/04/2010	No						Unknown
Mombasa CRH	2010	1	18/04/2010	No						Unknown
Mombasa CRH	2010	1.17	19/04/2010	No						Unknown
Kakamega CRH	2010	1	19/04/2010	Yes	Negative	Negative	Negative			Unknown
Kakamega CRH	2010	3	19/04/2010	Yes	Negative	Negative	Negative			Unknown
Kakamega CRH	2010	10	19/04/2010	Yes	Negative	Negative	Negative			Unknown
Siaya CRH	2010	0.45	19/04/2010	Yes	Negative	Negative	Negative			Discharge alive
Siaya CRH	2010	0.52	19/04/2010	Yes	Negative	Negative	Negative			Discharge alive
Siaya CRH	2010	0.5	19/04/2010	Yes	Negative	Negative	Negative			Discharge alive
Kenyatta NH	2010	1.75	20/04/2010	No						Unknown
Mombasa CRH	2010	0.83	20/04/2010	No						Unknown
Mombasa CRH	2010	0.67	20/04/2010	No						Unknown
Kakamega CRH	2010	3	20/04/2010	Yes	Negative	Negative	Negative			Unknown
Kakamega CRH	2010	4.5	20/04/2010	Yes	Negative	Negative	Negative			Unknown
Mombasa CRH	2010	1	20/04/2010	Yes	Negative	Negative	Negative			Unknown
Nyeri CRH	2010	1.5	20/04/2010	Yes	Negative	Negative	Negative			Unknown
Siaya CRH	2010	0.29	20/04/2010	Yes	Negative	Negative	Negative			Discharge alive
Siaya CRH	2010	1.65	20/04/2010	Yes	Negative	Negative	Negative			Discharge alive
Siaya CRH	2010	3.96	20/04/2010	Yes	Negative	Negative	Negative			Discharge alive
Siaya CRH	2010	0.25	20/04/2010	Yes	Negative	Negative	Negative			Discharge alive
Nyeri CRH	2010	7	21/04/2010	No						Unknown
Nyeri CRH	2010	0.67	21/04/2010	Yes	Negative	Negative	Negative			Unknown
Nyeri CRH	2010	1.58	21/04/2010	Yes	Negative	Positive	Positive			Unknown
Siaya CRH	2010	0.58	22/04/2010	No	Negative	Negative				Died
Siaya CRH	2010	2.67	22/04/2010	No	Negative	Negative				Discharge alive
Kenyatta NH	2010	0.67	22/04/2010	No						Unknown
Nyeri CRH	2010	0.5	22/04/2010	No						Unknown
Kakamega CRH	2010	1.33	22/04/2010	Yes	Negative	Negative	Negative			Unknown
Kenyatta NH	2010	1.25	22/04/2010	Yes	Negative	Negative	Negative			Unknown
Kenyatta NH	2010	1.83	22/04/2010	Yes	Negative	Negative	Negative			Unknown
Siaya CRH	2010	2.61	23/04/2010	No	Negative	Negative				Discharge alive
Mombasa CRH	2010	0.83	23/04/2010	No						Unknown
Nakuru CRH	2010	0.75	23/04/2010	No						Unknown
Nyeri CRH	2010	1.25	23/04/2010	No						Unknown
Nyeri CRH	2010	1.58	23/04/2010	No						Unknown
Nyeri CRH	2010	4.75	23/04/2010	No						Unknown
Nyeri CRH	2010	1.17	23/04/2010	No						Unknown
Kenyatta NH	2010	0.5	23/04/2010	Yes	Negative	Negative	Negative			Unknown
Siaya CRH	2010	0.19	23/04/2010	Yes	Negative	Negative	Negative			Discharge alive
Siaya CRH	2010	0.38	23/04/2010	Yes	Negative	Negative	Negative			Discharge alive
Siaya CRH	2010	1	23/04/2010	Yes	Negative	Negative	Negative			Discharge alive
Siaya CRH	2010	1.02	24/04/2010	No	Negative	Negative				Discharge alive
Nyeri CRH	2010	2.33	24/04/2010	No						Unknown
Nyeri CRH	2010	2.17	24/04/2010	No						Unknown
Kakamega CRH	2010	1.5	24/04/2010	Yes	Negative	Negative	Negative			Unknown
Kakamega CRH	2010	0.75	24/04/2010	Yes	Negative	Negative	Negative			Unknown
Mombasa CRH	2010	0.33	24/04/2010	Yes	Negative	Negative	Negative			Unknown
Siaya CRH	2010	30.86	24/04/2010	Yes	Negative	Negative	Negative			Died
Siaya CRH	2010	0.53	24/04/2010	Yes	Negative	Negative	Negative			Discharge alive
Siaya CRH	2010	1.91	25/04/2010	No	Negative	Negative				Discharge alive
Kakamega CRH	2010	3	25/04/2010	No						Unknown
Mombasa CRH	2010	0.67	25/04/2010	Yes	Negative	Negative	Negative			Unknown
Mombasa CRH	2010	1.17	25/04/2010	Yes	Negative	Negative	Negative			Unknown
Siaya CRH	2010	52.87	25/04/2010	Yes	Negative	Negative	Negative			Discharge alive
Siaya CRH	2010	0.5	26/04/2010	No	Negative	Negative				Discharge alive
Siaya CRH	2010	0.71	26/04/2010	No	Negative	Negative				Discharge alive
Siaya CRH	2010	7	26/04/2010	No	Negative	Negative				Died
Kakamega CRH	2010	0.67	26/04/2010	No						Unknown
Kenyatta NH	2010	1.42	26/04/2010	No						Unknown
Nyeri CRH	2010	6	26/04/2010	No						Unknown
Nyeri CRH	2010	10	26/04/2010	No						Unknown
Nyeri CRH	2010	1.5	26/04/2010	No						Unknown
Siaya CRH	2010	0.35	26/04/2010	Yes	Negative	Negative	Negative			Discharge alive
Siaya CRH	2010	0.63	26/04/2010	Yes	Negative	Negative	Negative			Discharge alive
Siaya CRH	2010	0.77	26/04/2010	Yes	Negative	Negative	Negative			Died
Siaya CRH	2010	0.04	26/04/2010	Yes	Negative	Negative	Negative			Died
Kenyatta NH	2010	1.25	27/04/2010	No						Unknown
Nyeri CRH	2010	4.83	27/04/2010	No						Unknown
Nyeri CRH	2010	72	27/04/2010	Yes	Negative	Negative	Negative			Unknown
Siaya CRH	2010	1.86	27/04/2010	Yes	Negative	Negative	Negative			Discharge alive
Siaya CRH	2010	0.75	28/04/2010	No	Negative	Negative				Discharge alive
Nyeri CRH	2010	3	28/04/2010	No						Unknown
Nyeri CRH	2010	1	28/04/2010	No						Unknown
Kakamega CRH	2010	3	28/04/2010	Yes	Negative	Negative	Negative			Unknown
Nyeri CRH	2010	1.33	28/04/2010	Yes	Negative	Negative	Negative			Unknown
Siaya CRH	2010	0.08	28/04/2010	Yes	Negative	Negative	Negative			Discharge alive
Mombasa CRH	2010	0.25	29/04/2010	No						Unknown
Kakamega CRH	2010	0.25	29/04/2010	Yes	Negative	Negative	Negative			Unknown
Kakamega CRH	2010	5.08	29/04/2010	Yes	Negative	Negative	Negative			Unknown
Kakamega CRH	2010	1.17	29/04/2010	Yes	Negative	Negative	Negative			Unknown
Kenyatta NH	2010	0.33	29/04/2010	Yes	Negative	Negative	Negative			Unknown
Kenyatta NH	2010	1	29/04/2010	Yes	Negative	Negative	Negative			Unknown
Kenyatta NH	2010	1.33	29/04/2010	Yes	Negative	Negative	Negative			Unknown
Mombasa CRH	2010	0.83	29/04/2010	Yes	Negative	Negative	Negative			Unknown
Siaya CRH	2010	3.76	29/04/2010	Yes	Negative	Negative	Negative			Discharge alive
Siaya CRH	2010	1.51	29/04/2010	Yes	Negative	Negative	Negative			Discharge alive
Siaya CRH	2010	1.13	29/04/2010	Yes	Negative	Negative	Negative			Discharge alive
Siaya CRH	2010	1.08	30/04/2010	No	Negative	Negative				Died
Siaya CRH	2010	0.6	30/04/2010	No	Negative	Negative				Died
Kakamega CRH	2010	5	30/04/2010	No						Unknown
Kakamega CRH	2010	1.42	30/04/2010	No						Unknown
Mombasa CRH	2010	1.33	30/04/2010	No						Unknown
Mombasa CRH	2010	1.33	30/04/2010	No						Unknown
Kakamega CRH	2010	2.5	30/04/2010	Yes	Negative	Negative	Negative			Unknown
Kakamega CRH	2010	1.67	30/04/2010	Yes	Negative	Negative	Negative			Unknown
Mombasa CRH	2010	0.75	30/04/2010	Yes	Negative	Negative	Negative			Unknown
Nyeri CRH	2010	27	30/04/2010	Yes	Negative	Negative	Negative			Unknown
Siaya CRH	2010	0.48	30/04/2010	Yes	Negative	Negative	Negative			Discharge alive
Siaya CRH	2010	0.59	01/05/2010	No	Negative	Negative				Discharge alive
Mombasa CRH	2010	0.25	01/05/2010	No						Unknown
Mombasa CRH	2010	1	01/05/2010	No						Unknown
Mombasa CRH	2010	0.25	01/05/2010	No						Unknown
Kakamega CRH	2010	1	01/05/2010	Yes	Negative	Negative	Negative			Unknown
Mombasa CRH	2010	1.5	01/05/2010	Yes	Negative	Negative	Negative			Unknown
Siaya CRH	2010	0.42	01/05/2010	Yes	Negative	Negative	Negative			Discharge alive
Kakamega CRH	2010	7	02/05/2010	No						Unknown
Kakamega CRH	2010	2.33	02/05/2010	No						Unknown
Kakamega CRH	2010	9	02/05/2010	No						Unknown
Kakamega CRH	2010	1.25	02/05/2010	Yes	Negative	Negative	Negative			Unknown
Kakamega CRH	2010	5	02/05/2010	Yes	Negative	Negative	Negative			Unknown
Kakamega CRH	2010	0.25	02/05/2010	Yes	Negative	Negative	Negative			Unknown
Kakamega CRH	2010	1.33	02/05/2010	Yes	Negative	Negative	Negative			Unknown
Kenyatta NH	2010	0.67	02/05/2010	Yes	Negative	Negative	Negative			Unknown
Mombasa CRH	2010	1.5	02/05/2010	Yes	Negative	Negative	Negative			Unknown
Nyeri CRH	2010	1.67	02/05/2010	Yes	Negative	Negative	Negative			Unknown
Nyeri CRH	2010	2.17	02/05/2010	Yes	Negative	Negative	Negative			Unknown
Siaya CRH	2010	64.9	02/05/2010	Yes	Negative	Negative	Negative			Discharge alive
Siaya CRH	2010	3.31	02/05/2010	Yes	Negative	Negative	Negative			Discharge alive
Siaya CRH	2010	0.76	02/05/2010	Yes	Negative	Negative	Negative			Discharge alive
Siaya CRH	2010	0.68	02/05/2010	Yes	Negative	Negative	Negative			Discharge alive
Siaya CRH	2010	0.81	02/05/2010	Yes	Negative	Negative	Negative			Discharge alive
Kakamega CRH	2010	3	03/05/2010	Yes	Negative	Negative	Negative			Discharge alive
Kenyatta NH	2010	0.33	03/05/2010	Yes	Negative	Negative	Negative			Unknown
Mombasa CRH	2010	1.42	03/05/2010	Yes	Negative	Negative	Negative			Unknown
Nyeri CRH	2010	1.17	03/05/2010	Yes	Negative	Negative	Negative			Unknown
Nyeri CRH	2010	0.5	03/05/2010	Yes	Negative	Negative	Negative			Unknown
Nyeri CRH	2010	0.33	03/05/2010	Yes	Negative	Negative	Negative			Unknown
Siaya CRH	2010	15.89	03/05/2010	Yes	Negative	Negative	Negative			Discharge alive
Siaya CRH	2010	0.62	03/05/2010	Yes	Negative	Negative	Negative			Discharge alive
Siaya CRH	2010	2.83	03/05/2010	Yes	Negative	Negative	Negative			Discharge alive
Siaya CRH	2010	0.89	03/05/2010	Yes	Negative	Negative	Negative			Discharge alive
Siaya CRH	2010	0.71	03/05/2010	Yes	Positive	Negative	Positive	No	No	Discharge alive
Siaya CRH	2010	0.6	04/05/2010	No	Negative	Negative				Discharge alive
Siaya CRH	2010	2.77	04/05/2010	No	Negative	Negative				Discharge alive
Kakamega CRH	2010	4	04/05/2010	Yes	Negative	Negative	Negative			Unknown
Kakamega CRH	2010	3.58	04/05/2010	Yes	Negative	Negative	Negative			Unknown
Nyeri CRH	2010	1.17	04/05/2010	Yes	Negative	Negative	Negative			Unknown
Siaya CRH	2010	0.47	04/05/2010	Yes	Negative	Negative	Negative			Died
Siaya CRH	2010	0.22	04/05/2010	Yes	Negative	Negative	Negative			Discharge alive
Siaya CRH	2010	0.66	05/05/2010	No	Negative	Negative				Discharge alive
Siaya CRH	2010	0.6	05/05/2010	No	Negative	Negative				Discharge alive
Siaya CRH	2010	0.51	05/05/2010	No	Negative	Negative				Discharge alive
Kakamega CRH	2010	2	05/05/2010	Yes	Negative	Negative	Negative			Unknown
Kakamega CRH	2010	1	05/05/2010	Yes	Negative	Negative	Negative			Discharge alive
Siaya CRH	2010	1.03	05/05/2010	Yes	Negative	Negative	Negative			Discharge alive
Siaya CRH	2010	0.9	05/05/2010	Yes	Negative	Negative	Negative			Discharge alive
Siaya CRH	2010	0.76	05/05/2010	Yes	Negative	Negative	Negative			Discharge alive
Siaya CRH	2010	7.52	05/05/2010	Yes	Negative	Negative	Negative			Discharge alive
Kakamega CRH	2010	0.5	06/05/2010	Yes	Negative	Negative	Negative			Discharge alive
Nyeri CRH	2010	1.33	06/05/2010	Yes	Negative	Negative	Negative			Unknown
Siaya CRH	2010	0.7	06/05/2010	Yes	Negative	Negative	Negative			Discharge alive
Siaya CRH	2010	0.62	06/05/2010	Yes	Negative	Positive	Positive			Discharge alive
Siaya CRH	2010	0.61	06/05/2010	Yes	Negative	Negative	Negative			Discharge alive
Mombasa CRH	2010	1.5	06/05/2010	Yes	Positive	Negative	Positive	No	Yes	Unknown
Mombasa CRH	2010	3	06/05/2010	Yes	Positive	Negative	Positive	No	Yes	Unknown
Kakamega CRH	2010	2.5	07/05/2010	Yes	Negative	Negative	Negative			Discharge alive
Kenyatta NH	2010	0.75	07/05/2010	Yes	Negative	Negative	Negative			Unknown
Kenyatta NH	2010	3.17	07/05/2010	Yes	Negative	Negative	Negative			Unknown
Nyeri CRH	2010	0.5	07/05/2010	Yes	Negative	Negative	Negative			Unknown
Nyeri CRH	2010	3.75	07/05/2010	Yes	Negative	Negative	Negative			Unknown
Nyeri CRH	2010	0.67	07/05/2010	Yes	Negative	Negative	Negative			Unknown
Siaya CRH	2010	0.67	07/05/2010	Yes	Negative	Negative	Negative			Discharge alive
Siaya CRH	2010	0.67	07/05/2010	Yes	Negative	Negative	Negative			Discharge alive
Siaya CRH	2010	0.32	07/05/2010	Yes	Negative	Negative	Negative			Discharge alive
Siaya CRH	2010	0.21	07/05/2010	Yes	Negative	Negative	Negative			Discharge alive
Kenyatta NH	2010	0.83	07/05/2010	Yes	Positive	Negative	Positive	No	No	Unknown
Mombasa CRH	2010	3.5	07/05/2010	Yes	Positive	Negative	Positive	No	Yes	Unknown
Mombasa CRH	2010	2.33	07/05/2010	Yes	Positive	Negative	Positive	No	Yes	Unknown
Siaya CRH	2010	1	08/05/2010	No	Negative	Negative				Discharge alive
Siaya CRH	2010	0.62	08/05/2010	No	Negative	Negative				Died
Mombasa CRH	2010	0.33	08/05/2010	Yes	Negative	Negative	Negative			Unknown
Mombasa CRH	2010	2.83	08/05/2010	Yes	Negative	Negative	Negative			Unknown
Nyeri CRH	2010	0.83	08/05/2010	Yes	Negative	Negative	Negative			Unknown
Siaya CRH	2010	0.65	08/05/2010	Yes	Negative	Negative	Negative			Discharge alive
Siaya CRH	2010	0.82	09/05/2010	No	Negative	Negative				Other
Kenyatta NH	2010	0.33	09/05/2010	Yes	Negative	Negative	Negative			Unknown
Kenyatta NH	2010	0.5	09/05/2010	Yes	Negative	Negative	Negative			Unknown
Nyeri CRH	2010	1	09/05/2010	Yes	Negative	Negative	Negative			Unknown
Nyeri CRH	2010	1.83	09/05/2010	Yes	Negative	Negative	Negative			Unknown
Nyeri CRH	2010	1.25	09/05/2010	Yes	Negative	Negative	Negative			Unknown
Siaya CRH	2010	2.97	09/05/2010	Yes	Negative	Negative	Negative			Discharge alive
Siaya CRH	2010	0.61	09/05/2010	Yes	Negative	Negative	Negative			Discharge alive
Siaya CRH	2010	0.66	10/05/2010	No	Negative	Negative				Died
Siaya CRH	2010	0.45	10/05/2010	No	Negative	Negative				Discharge alive
Siaya CRH	2010	2.13	10/05/2010	No	Negative	Negative				Died
Siaya CRH	2010	2.49	10/05/2010	Yes	Negative	Negative	Negative			Discharge alive
Siaya CRH	2010	0.3	10/05/2010	Yes	Negative	Negative	Negative			Discharge alive
Siaya CRH	2010	3.71	10/05/2010	Yes	Negative	Negative	Negative			Discharge alive
Kakamega CRH	2010	0.75	11/05/2010	Yes	Negative	Negative	Negative			Discharge alive
Nyeri CRH	2010	2.92	11/05/2010	Yes	Negative	Negative	Negative			Unknown
Siaya CRH	2010	7.22	11/05/2010	Yes	Negative	Negative	Negative			Discharge alive
Siaya CRH	2010	1.37	11/05/2010	Yes	Negative	Negative	Negative			Discharge alive
Siaya CRH	2010	1.7	11/05/2010	Yes	Negative	Negative	Negative			Discharge alive
Siaya CRH	2010	1.39	12/05/2010	No	Negative	Negative				Discharge alive
Kakamega CRH	2010	2.25	12/05/2010	Yes	Negative	Negative	Negative			Discharge alive
Kakamega CRH	2010	9	12/05/2010	Yes	Negative	Negative	Negative			Discharge alive
Siaya CRH	2010	2.68	12/05/2010	Yes	Negative	Negative	Negative			Discharge alive
Siaya CRH	2010	0.09	12/05/2010	Yes	Negative	Negative	Negative			Discharge alive
Siaya CRH	2010	0.29	12/05/2010	Yes	Negative	Negative	Negative			Discharge alive
Mombasa CRH	2010	2	12/05/2010	Yes	Positive	Negative	Positive	No	Yes	Unknown
Mombasa CRH	2010	0.67	12/05/2010	Yes	Positive	Negative	Positive	No	Yes	Unknown
Siaya CRH	2010	0.53	13/05/2010	No	Negative	Negative				Discharge alive
Siaya CRH	2010	0.71	13/05/2010	No	Negative	Negative				Discharge alive
Kakamega CRH	2010	3	13/05/2010	Yes	Negative	Negative	Negative			Discharge alive
Mombasa CRH	2010	1.17	13/05/2010	Yes	Negative	Negative	Negative			Unknown
Nyeri CRH	2010	1.58	13/05/2010	Yes	Negative	Negative	Negative			Unknown
Nyeri CRH	2010	0.33	13/05/2010	Yes	Negative	Negative	Negative			Unknown
Nyeri CRH	2010	1.17	13/05/2010	Yes	Negative	Negative	Negative			Unknown
Nyeri CRH	2010	58	13/05/2010	Yes	Negative	Negative	Negative			Unknown
Siaya CRH	2010	1.38	13/05/2010	Yes	Negative	Negative	Negative			Discharge alive
Siaya CRH	2010	0.5	13/05/2010	Yes	Negative	Negative	Negative			Discharge alive
Siaya CRH	2010	1.96	13/05/2010	Yes	Negative	Negative	Negative			Discharge alive
Siaya CRH	2010	0.92	14/05/2010	No	Negative	Negative				Discharge alive
Siaya CRH	2010	0.07	14/05/2010	No	Negative	Negative				Discharge alive
Siaya CRH	2010	0.32	14/05/2010	No	Negative	Negative				Discharge alive
Siaya CRH	2010	0.61	14/05/2010	No	Negative	Negative				Discharge alive
Kenyatta NH	2010	1.17	14/05/2010	Yes	Negative	Negative	Negative			Unknown
Siaya CRH	2010	2.7	14/05/2010	Yes	Negative	Negative	Negative			Discharge alive
Siaya CRH	2010	0.22	14/05/2010	Yes	Negative	Negative	Negative			Discharge alive
Siaya CRH	2010	2.08	15/05/2010	No	Negative	Negative				Discharge alive
Siaya CRH	2010	1.37	15/05/2010	No	Negative	Negative				Discharge alive
Siaya CRH	2010	5.92	15/05/2010	No	Negative	Negative				Discharge alive
Siaya CRH	2010	3.99	15/05/2010	No	Negative	Negative				Discharge alive
Siaya CRH	2010	0.54	15/05/2010	No	Negative	Negative				Discharge alive
Kakamega CRH	2010	1.67	15/05/2010	Yes	Negative	Negative	Negative			Discharge alive
Mombasa CRH	2010	1.08	15/05/2010	Yes	Negative	Negative	Negative			Unknown
Nyeri CRH	2010	1.42	15/05/2010	Yes	Negative	Negative	Negative			Unknown
Nyeri CRH	2010	0.67	15/05/2010	Yes	Negative	Negative	Negative			Unknown
Siaya CRH	2010	3.75	15/05/2010	Yes	Negative	Negative	Negative			Discharge alive
Siaya CRH	2010	0.5	15/05/2010	Yes	Negative	Negative	Negative			Discharge alive
Siaya CRH	2010	2.14	15/05/2010	Yes	Negative	Positive	Positive			Discharge alive
Siaya CRH	2010	0.86	15/05/2010	Yes	Negative	Negative	Negative			Discharge alive
Siaya CRH	2010	0.24	16/05/2010	No	Negative	Negative				Discharge alive
Siaya CRH	2010	2.35	16/05/2010	No	Negative	Negative				Discharge alive
Siaya CRH	2010	9.95	16/05/2010	No	Negative	Negative				Discharge alive
Kakamega CRH	2010	1.33	16/05/2010	Yes	Negative	Negative	Negative			Unknown
Kenyatta NH	2010	1.33	16/05/2010	Yes	Negative	Negative	Negative			Unknown
Nakuru CRH	2010	1.83	16/05/2010	Yes	Negative	Negative	Negative			Unknown
Nyeri CRH	2010	3.5	16/05/2010	Yes	Negative	Negative	Negative			Unknown
Nyeri CRH	2010	2	16/05/2010	Yes	Negative	Negative	Negative			Unknown
Siaya CRH	2010	0.29	16/05/2010	Yes	Negative	Negative	Negative			Discharge alive
Siaya CRH	2010	0.11	16/05/2010	Yes	Positive	Negative	Positive	No	Yes	Discharge alive
Siaya CRH	2010	0.53	17/05/2010	No	Negative	Negative				Died
Kakamega CRH	2010	7	17/05/2010	Yes	Negative	Negative	Negative			Discharge alive
Kenyatta NH	2010	1.17	17/05/2010	Yes	Negative	Negative	Negative			Unknown
Mombasa CRH	2010	1.67	17/05/2010	Yes	Negative	Negative	Negative			Unknown
Nyeri CRH	2010	0.25	17/05/2010	Yes	Negative	Negative	Negative			Unknown
Nyeri CRH	2010	1.58	17/05/2010	Yes	Negative	Negative	Negative			Unknown
Nyeri CRH	2010	2.5	17/05/2010	Yes	Negative	Negative	Negative			Unknown
Nyeri CRH	2010	0.25	17/05/2010	Yes	Negative	Negative	Negative			Unknown
Siaya CRH	2010	0.17	17/05/2010	Yes	Negative	Negative	Negative			Discharge alive
Siaya CRH	2010	0.33	17/05/2010	Yes	Negative	Negative	Negative			Discharge alive
Siaya CRH	2010	2.74	17/05/2010	Yes	Negative	Negative	Negative			Discharge alive
Siaya CRH	2010	0.44	17/05/2010	Yes	Positive	Negative	Negative	No	No	Discharge alive
Siaya CRH	2010	63.94	18/05/2010	No	Negative	Negative				Discharge alive
Siaya CRH	2010	2.27	18/05/2010	No	Negative	Negative				Died
Siaya CRH	2010	2.28	18/05/2010	No	Negative	Negative				Discharge alive
Siaya CRH	2010	1.84	18/05/2010	No	Negative	Negative				Discharge alive
Kenyatta NH	2010	1.25	18/05/2010	Yes	Negative	Negative	Negative			Unknown
Nyeri CRH	2010	1.17	18/05/2010	Yes	Negative	Negative	Negative			Unknown
Siaya CRH	2010	1.01	18/05/2010	Yes	Negative	Negative	Negative			Discharge alive
Siaya CRH	2010	0.38	18/05/2010	Yes	Negative	Negative	Negative			Discharge alive
Siaya CRH	2010	0.77	18/05/2010	Yes	Negative	Negative	Negative			Discharge alive
Siaya CRH	2010	2.57	19/05/2010	No	Negative	Negative				Discharge alive
Kakamega CRH	2010	1	19/05/2010	Yes	Negative	Negative	Negative			Discharge alive
Kakamega CRH	2010	2	19/05/2010	Yes	Negative	Negative	Negative			Discharge alive
Mombasa CRH	2010	1	19/05/2010	Yes	Negative	Negative	Negative			Unknown
Nyeri CRH	2010	2	19/05/2010	Yes	Negative	Negative	Negative			Unknown
Nyeri CRH	2010	0.83	19/05/2010	Yes	Negative	Negative	Negative			Unknown
Siaya CRH	2010	0.62	19/05/2010	Yes	Negative	Negative	Negative			Discharge alive
Siaya CRH	2010	41.94	20/05/2010	No	Negative	Negative				Died
Siaya CRH	2010	1.14	20/05/2010	No	Negative	Negative				Died
Kakamega CRH	2010	5	20/05/2010	Yes	Negative	Negative	Negative			Discharge alive
Kakamega CRH	2010	1.67	20/05/2010	Yes	Negative	Negative	Negative			Discharge alive
Nyeri CRH	2010	1.42	20/05/2010	Yes	Negative	Negative	Negative			Discharge alive
Nyeri CRH	2010	0.67	20/05/2010	Yes	Negative	Negative	Negative			Discharge alive
Siaya CRH	2010	0.39	20/05/2010	Yes	Negative	Negative	Negative			Discharge alive
Siaya CRH	2010	0.83	20/05/2010	Yes	Negative	Negative	Negative			Discharge alive
Siaya CRH	2010	1.4	20/05/2010	Yes	Negative	Negative	Negative			Discharge alive
Siaya CRH	2010	1.03	21/05/2010	No	Negative	Negative				Discharge alive
Kakamega CRH	2010	3.5	21/05/2010	Yes	Negative	Negative	Negative			Discharge alive
Kakamega CRH	2010	40	21/05/2010	Yes	Negative	Negative	Negative			Unknown
Kenyatta NH	2010	1.17	21/05/2010	Yes	Negative	Negative	Negative			Unknown
Nakuru CRH	2010	1.67	21/05/2010	Yes	Negative	Negative	Negative			Unknown
Nyeri CRH	2010	2.42	21/05/2010	Yes	Negative	Negative	Negative			Discharge alive
Nyeri CRH	2010	1.67	21/05/2010	Yes	Negative	Negative	Negative			Discharge alive
Siaya CRH	2010	0.64	21/05/2010	Yes	Negative	Negative	Negative			Discharge alive
Siaya CRH	2010	0.53	21/05/2010	Yes	Negative	Negative	Negative			Discharge alive
Siaya CRH	2010	0.33	21/05/2010	Yes	Negative	Negative	Negative			Discharge alive
Siaya CRH	2010	1.36	22/05/2010	No	Negative	Negative				Discharge alive
Kakamega CRH	2010	4	22/05/2010	Yes	Negative	Negative	Negative			Discharge alive
Mombasa CRH	2010	2.75	22/05/2010	Yes	Negative	Negative	Negative			Unknown
Nyeri CRH	2010	1.58	22/05/2010	Yes	Negative	Negative	Negative			Discharge alive
Siaya CRH	2010	2.38	22/05/2010	Yes	Negative	Negative	Negative			Discharge alive
Siaya CRH	2010	0.75	22/05/2010	Yes	Negative	Negative	Negative			Discharge alive
Siaya CRH	2010	0.87	22/05/2010	Yes	Negative	Negative	Negative			Discharge alive
Kakamega CRH	2010	1.67	23/05/2010	Yes	Negative	Negative	Negative			Discharge alive
Nyeri CRH	2010	2.67	23/05/2010	Yes	Negative	Negative	Negative			Discharge alive
Siaya CRH	2010	0.17	23/05/2010	Yes	Negative	Negative	Negative			Discharge alive
Nakuru CRH	2010	1.5	24/05/2010	Yes	Negative	Negative	Negative			Unknown
Nyeri CRH	2010	1.67	24/05/2010	Yes	Negative	Negative	Negative			Unknown
Siaya CRH	2010	0.48	24/05/2010	Yes	Negative	Negative	Negative			Discharge alive
Siaya CRH	2010	0.32	24/05/2010	Yes	Negative	Negative	Negative			Discharge alive
Nyeri CRH	2010	0.83	25/05/2010	Yes	Negative	Negative	Negative			Discharge alive
Siaya CRH	2010	30.98	25/05/2010	Yes	Negative	Negative	Negative			Discharge alive
Siaya CRH	2010	0.6	25/05/2010	Yes	Negative	Negative	Negative			Died
Nyeri CRH	2010	1.5	26/05/2010	Yes	Negative	Negative	Negative			Unknown
Nyeri CRH	2010	4	26/05/2010	Yes	Negative	Negative	Negative			Unknown
Siaya CRH	2010	57.96	26/05/2010	Yes	Negative	Negative	Negative			Discharge alive
Mombasa CRH	2010	24	27/05/2010	Yes	Negative	Negative	Negative			Unknown
Siaya CRH	2010	1.3	27/05/2010	Yes	Negative	Negative	Negative			Discharge alive
Siaya CRH	2010	1.54	27/05/2010	Yes	Negative	Negative	Negative			Other
Siaya CRH	2010	1.83	27/05/2010	Yes	Negative	Negative	Negative			Discharge alive
Mombasa CRH	2010	0.5	28/05/2010	Yes	Negative	Negative	Negative			Unknown
Mombasa CRH	2010	0.33	28/05/2010	Yes	Negative	Negative	Negative			Discharge alive
Nakuru CRH	2010	1	28/05/2010	Yes	Negative	Negative	Negative			Unknown
Nyeri CRH	2010	1.5	28/05/2010	Yes	Negative	Negative	Negative			Unknown
Nyeri CRH	2010	2.25	28/05/2010	Yes	Negative	Negative	Negative			Unknown
Nyeri CRH	2010	38	28/05/2010	Yes	Negative	Negative	Negative			Discharge alive
Siaya CRH	2010	53.97	28/05/2010	Yes	Negative	Negative	Negative			Discharge alive
Siaya CRH	2010	10.96	28/05/2010	Yes	Negative	Negative	Negative			Other
Siaya CRH	2010	0.45	28/05/2010	Yes	Negative	Negative	Negative			Discharge alive
Siaya CRH	2010	1.64	28/05/2010	Yes	Negative	Negative	Negative			Discharge alive
Nyeri CRH	2010	1.17	29/05/2010	No						Unknown
Mombasa CRH	2010	1.83	29/05/2010	Yes	Negative	Negative	Negative			Discharge alive
Nakuru CRH	2010	0.5	29/05/2010	Yes	Negative	Negative	Negative			Unknown
Nyeri CRH	2010	0.75	29/05/2010	Yes	Negative	Negative	Negative			Unknown
Siaya CRH	2010	0.54	30/05/2010	No	Negative	Negative				Other
Siaya CRH	2010	2.08	30/05/2010	No	Negative	Negative				Discharge alive
Siaya CRH	2010	0.73	30/05/2010	No	Negative	Negative				Discharge alive
Siaya CRH	2010	5.08	30/05/2010	No	Negative	Negative				Died
Mombasa CRH	2010	1.33	30/05/2010	Yes	Negative	Negative	Negative			Unknown
Mombasa CRH	2010	1.83	30/05/2010	Yes	Negative	Negative	Negative			Discharge alive
Mombasa CRH	2010	10	30/05/2010	Yes	Negative	Negative	Negative			Unknown
Nakuru CRH	2010	2.5	30/05/2010	Yes	Negative	Negative	Negative			Unknown
Nakuru CRH	2010	0.83	30/05/2010	Yes	Negative	Negative	Negative			Unknown
Nakuru CRH	2010	1.5	30/05/2010	Yes	Negative	Negative	Negative			Unknown
Nyeri CRH	2010	1.58	30/05/2010	Yes	Negative	Negative	Negative			Unknown
Siaya CRH	2010	21.96	30/05/2010	Yes	Negative	Negative	Negative			Discharge alive
Siaya CRH	2010	0.1	30/05/2010	Yes	Negative	Negative	Negative			Discharge alive
Siaya CRH	2010	2.02	30/05/2010	Yes	Negative	Negative	Negative			Discharge alive
Siaya CRH	2010	2.01	30/05/2010	Yes	Negative	Negative	Negative			Discharge alive
Siaya CRH	2010	0.05	30/05/2010	Yes	Negative	Negative	Negative			Discharge alive
Siaya CRH	2010	2.9	30/05/2010	Yes	Negative	Negative	Negative			Discharge alive
Siaya CRH	2010	2.97	31/05/2010	No	Negative	Negative				Discharge alive
Mombasa CRH	2010	0.67	31/05/2010	Yes	Negative	Negative	Negative			Discharge alive
Mombasa CRH	2010	1.42	31/05/2010	Yes	Negative	Negative	Negative			Unknown
Mombasa CRH	2010	1.33	31/05/2010	Yes	Negative	Negative	Negative			Discharge alive
Mombasa CRH	2010	0.33	31/05/2010	Yes	Negative	Negative	Negative			Unknown
Nyeri CRH	2010	1.58	31/05/2010	Yes	Negative	Negative	Negative			Discharge alive
Nyeri CRH	2010	1.5	31/05/2010	Yes	Negative	Negative	Negative			Discharge alive
Nyeri CRH	2010	2.5	31/05/2010	Yes	Negative	Negative	Negative			Discharge alive
Nyeri CRH	2010	4.5	31/05/2010	Yes	Negative	Negative	Negative			Discharge alive
Siaya CRH	2010	49.97	31/05/2010	Yes	Negative	Negative	Negative			Discharge alive
Siaya CRH	2010	0.32	31/05/2010	Yes	Negative	Negative	Negative			Discharge alive
Siaya CRH	2010	0.37	01/06/2010	No	Negative	Negative				Died
Kakamega CRH	2010	1.75	01/06/2010	No						Unknown
Mombasa CRH	2010	4	01/06/2010	Yes	Negative	Negative	Negative			Unknown
Mombasa CRH	2010	1.83	01/06/2010	Yes	Negative	Negative	Negative			Unknown
Nakuru CRH	2010	1.83	01/06/2010	Yes	Negative	Negative	Negative			Unknown
Nyeri CRH	2010	1.25	01/06/2010	Yes	Negative	Negative	Negative			Unknown
Siaya CRH	2010	0.19	01/06/2010	Yes	Negative	Negative	Negative			Discharge alive
Siaya CRH	2010	1.03	01/06/2010	Yes	Negative	Negative	Negative			Discharge alive
Siaya CRH	2010	0.65	01/06/2010	Yes	Negative	Negative	Negative			Discharge alive
Siaya CRH	2010	1.47	01/06/2010	Yes	Negative	Negative	Negative			Other
Siaya CRH	2010	1.32	01/06/2010	Yes	Negative	Negative	Negative			Discharge alive
Siaya CRH	2010	0.83	01/06/2010	Yes	Negative	Negative	Negative			Discharge alive
Mombasa CRH	2010	4	02/06/2010	Yes	Negative	Negative	Negative			Discharge alive
Nakuru CRH	2010	1.5	02/06/2010	Yes	Negative	Negative	Negative			Unknown
Nyeri CRH	2010	2.5	02/06/2010	Yes	Negative	Negative	Negative			Unknown
Nyeri CRH	2010	1.17	02/06/2010	Yes	Negative	Negative	Negative			Discharge alive
Nyeri CRH	2010	32	02/06/2010	Yes	Negative	Negative	Negative			Unknown
Siaya CRH	2010	0.86	02/06/2010	Yes	Negative	Negative	Negative			Discharge alive
Siaya CRH	2010	0.58	02/06/2010	Yes	Negative	Negative	Negative			Discharge alive
Siaya CRH	2010	8.84	02/06/2010	Yes	Negative	Negative	Negative			Discharge alive
Kakamega CRH	2010	2	03/06/2010	Yes	Negative	Negative	Negative			Discharge alive
Kakamega CRH	2010	0.75	03/06/2010	Yes	Negative	Negative	Negative			Unknown
Siaya CRH	2010	1.3	03/06/2010	Yes	Negative	Negative	Negative			Discharge alive
Kakamega CRH	2010	3	04/06/2010	Yes	Negative	Negative	Negative			Discharge alive
Mombasa CRH	2010	1.17	04/06/2010	Yes	Negative	Negative	Negative			Discharge alive
Nyeri CRH	2010	0.25	04/06/2010	Yes	Negative	Negative	Negative			Unknown
Siaya CRH	2010	22.98	04/06/2010	Yes	Negative	Negative	Negative			Died
Siaya CRH	2010	21.57	04/06/2010	Yes	Negative	Negative	Negative			Died
Siaya CRH	2010	0.67	04/06/2010	Yes	Negative	Negative	Negative			Discharge alive
Siaya CRH	2010	26.98	05/06/2010	No	Negative	Negative				Discharge alive
Siaya CRH	2010	0.96	05/06/2010	No	Negative	Negative				Discharge alive
Kakamega CRH	2010	1.83	05/06/2010	Yes	Negative	Negative	Negative			Discharge alive
Kenyatta NH	2010	2.58	05/06/2010	Yes	Negative	Negative	Negative			Unknown
Mombasa CRH	2010	3	05/06/2010	Yes	Negative	Negative	Negative			Discharge alive
Mombasa CRH	2010	1.5	05/06/2010	Yes	Negative	Negative	Negative			Discharge alive
Nyeri CRH	2010	3	05/06/2010	Yes	Negative	Negative	Negative			Discharge alive
Nyeri CRH	2010	1.67	05/06/2010	Yes	Negative	Negative	Negative			Discharge alive
Nyeri CRH	2010	2	05/06/2010	Yes	Negative	Negative	Negative			Discharge alive
Nyeri CRH	2010	0.33	05/06/2010	Yes	Negative	Negative	Negative			Discharge alive
Nyeri CRH	2010	1.33	05/06/2010	Yes	Negative	Negative	Negative			Discharge alive
Nyeri CRH	2010	1.33	05/06/2010	Yes	Negative	Negative	Negative			Discharge alive
Siaya CRH	2010	60.97	05/06/2010	Yes	Negative	Negative	Negative			Discharge alive
Siaya CRH	2010	70.98	05/06/2010	Yes	Negative	Negative	Negative			Discharge alive
Siaya CRH	2010	5.58	05/06/2010	Yes	Negative	Negative	Negative			Discharge alive
Siaya CRH	2010	1.03	05/06/2010	Yes	Negative	Negative	Negative			Discharge alive
Siaya CRH	2010	2.65	05/06/2010	Yes	Negative	Negative	Negative			Discharge alive
Siaya CRH	2010	2.35	05/06/2010	Yes	Negative	Negative	Negative			Discharge alive
Siaya CRH	2010	0.75	05/06/2010	Yes	Negative	Negative	Negative			Discharge alive
Siaya CRH	2010	0.89	05/06/2010	Yes	Negative	Negative	Negative			Discharge alive
Siaya CRH	2010	0.81	05/06/2010	Yes	Negative	Negative	Negative			Discharge alive
Kakamega CRH	2010	2.5	06/06/2010	Yes	Negative	Negative	Negative			Discharge alive
Kakamega CRH	2010	2.5	06/06/2010	Yes	Negative	Negative	Negative			Discharge alive
Kakamega CRH	2010	5	06/06/2010	Yes	Negative	Negative	Negative			Unknown
Kenyatta NH	2010	1.33	06/06/2010	Yes	Negative	Negative	Negative			Unknown
Mombasa CRH	2010	0.33	06/06/2010	Yes	Negative	Negative	Negative			Discharge alive
Mombasa CRH	2010	3.08	06/06/2010	Yes	Negative	Negative	Negative			Discharge alive
Mombasa CRH	2010	1	06/06/2010	Yes	Negative	Negative	Negative			Discharge alive
Nakuru CRH	2010	0.5	06/06/2010	Yes	Negative	Negative	Negative			Unknown
Nakuru CRH	2010	5	06/06/2010	Yes	Negative	Negative	Negative			Unknown
Siaya CRH	2010	75.99	06/06/2010	Yes	Negative	Negative	Negative			Discharge alive
Siaya CRH	2010	42.99	06/06/2010	Yes	Negative	Negative	Negative			Died
Siaya CRH	2010	0.26	06/06/2010	Yes	Negative	Negative	Negative			Discharge alive
Siaya CRH	2010	0.07	06/06/2010	Yes	Negative	Negative	Negative			Discharge alive
Siaya CRH	2010	0.53	06/06/2010	Yes	Negative	Negative	Negative			Discharge alive
Siaya CRH	2010	0.55	06/06/2010	Yes	Negative	Negative	Negative			Discharge alive
Kakamega CRH	2010	3	07/06/2010	Yes	Negative	Negative	Negative			Discharge alive
Kakamega CRH	2010	6	07/06/2010	Yes	Negative	Negative	Negative			Unknown
Mombasa CRH	2010	24	07/06/2010	Yes	Negative	Negative	Negative			Discharge alive
Mombasa CRH	2010	0.75	07/06/2010	Yes	Negative	Negative	Negative			Discharge alive
Nakuru CRH	2010	1.25	07/06/2010	Yes	Negative	Negative	Negative			Unknown
Nyeri CRH	2010	1.17	07/06/2010	Yes	Negative	Negative	Negative			Discharge alive
Siaya CRH	2010	1.83	07/06/2010	Yes	Negative	Negative	Negative			Discharge alive
Siaya CRH	2010	2.21	07/06/2010	Yes	Negative	Negative	Negative			Discharge alive
Mombasa CRH	2010	0.33	07/06/2010	Yes	Positive	Negative	Positive	No	No	Discharge alive
Siaya CRH	2010	1.12	08/06/2010	No	Negative	Negative				Discharge alive
Kakamega CRH	2010	2.5	08/06/2010	Yes	Negative	Negative	Negative			Unknown
Mombasa CRH	2010	1.75	08/06/2010	Yes	Negative	Negative	Negative			Discharge alive
Nyeri CRH	2010	3.5	08/06/2010	Yes	Negative	Negative	Negative			Discharge alive
Nyeri CRH	2010	1.83	08/06/2010	Yes	Negative	Negative	Negative			Unknown
Siaya CRH	2010	24.46	08/06/2010	Yes	Negative	Negative	Negative			Discharge alive
Siaya CRH	2010	1.24	08/06/2010	Yes	Negative	Negative	Negative			Discharge alive
Siaya CRH	2010	0.99	08/06/2010	Yes	Negative	Negative	Negative			Discharge alive
Siaya CRH	2010	2.74	08/06/2010	Yes	Negative	Negative	Negative			Unknown
Siaya CRH	2010	0.25	08/06/2010	Yes	Negative	Negative	Negative			Discharge alive
Siaya CRH	2010	0.13	09/06/2010	No	Negative	Negative				Discharge alive
Siaya CRH	2010	2.46	09/06/2010	No	Negative	Negative				Discharge alive
Kakamega CRH	2010	3.5	09/06/2010	Yes	Negative	Negative	Negative			Unknown
Kakamega CRH	2010	0.5	09/06/2010	Yes	Negative	Negative	Negative			Discharge alive
Kenyatta NH	2010	0.75	09/06/2010	Yes	Negative	Negative	Negative			Unknown
Mombasa CRH	2010	1	09/06/2010	Yes	Negative	Negative	Negative			Discharge alive
Nakuru CRH	2010	0.5	09/06/2010	Yes	Negative	Negative	Negative			Unknown
Nyeri CRH	2010	0.75	09/06/2010	Yes	Negative	Negative	Negative			Unknown
Nyeri CRH	2010	18	09/06/2010	Yes	Negative	Negative	Negative			Unknown
Siaya CRH	2010	3.93	09/06/2010	Yes	Negative	Negative	Negative			Discharge alive
Siaya CRH	2010	0.48	09/06/2010	Yes	Negative	Negative	Negative			Discharge alive
Siaya CRH	2010	1.72	09/06/2010	Yes	Negative	Negative	Negative			Discharge alive
Siaya CRH	2010	0.68	09/06/2010	Yes	Negative	Negative	Negative			Discharge alive
Siaya CRH	2010	2.83	09/06/2010	Yes	Negative	Negative	Negative			Discharge alive
Mombasa CRH	2010	12	10/06/2010	Yes	Negative	Negative	Negative			Discharge alive
Mombasa CRH	2010	2.5	10/06/2010	Yes	Negative	Negative	Negative			Discharge alive
Mombasa CRH	2010	0.33	10/06/2010	Yes	Negative	Negative	Negative			Discharge alive
Nyeri CRH	2010	0.83	10/06/2010	Yes	Negative	Negative	Negative			Unknown
Siaya CRH	2010	0.3	10/06/2010	Yes	Negative	Negative	Negative			Other
Siaya CRH	2010	0.55	10/06/2010	Yes	Negative	Negative	Negative			Discharge alive
Siaya CRH	2010	1.02	10/06/2010	Yes	Negative	Negative	Negative			Discharge alive
Siaya CRH	2010	0.62	11/06/2010	No	Negative	Negative				Discharge alive
Kakamega CRH	2010	4	11/06/2010	Yes	Negative	Negative	Negative			Unknown
Kakamega CRH	2010	5	11/06/2010	Yes	Negative	Negative	Negative			Discharge alive
Mombasa CRH	2010	1.17	11/06/2010	Yes	Negative	Negative	Negative			Discharge alive
Nakuru CRH	2010	1	11/06/2010	Yes	Negative	Negative	Negative			Unknown
Nakuru CRH	2010	0.33	11/06/2010	Yes	Negative	Negative	Negative			Unknown
Nyeri CRH	2010	0.83	11/06/2010	Yes	Negative	Negative	Negative			Unknown
Siaya CRH	2010	1	11/06/2010	Yes	Negative	Negative	Negative			Discharge alive
Siaya CRH	2010	1.33	11/06/2010	Yes	Negative	Negative	Negative			Discharge alive
Siaya CRH	2010	0.03	11/06/2010	Yes	Negative	Negative	Negative			Discharge alive
Siaya CRH	2010	0.28	11/06/2010	Yes	Negative	Negative	Negative			Discharge alive
Siaya CRH	2010	1.25	12/06/2010	No	Negative	Negative				Discharge alive
Siaya CRH	2010	1.52	12/06/2010	No	Negative	Negative				Discharge alive
Mombasa CRH	2010	2	12/06/2010	Yes	Negative	Negative	Negative			Discharge alive
Nyeri CRH	2010	1	12/06/2010	Yes	Negative	Negative	Negative			Unknown
Nyeri CRH	2010	2	12/06/2010	Yes	Negative	Negative	Negative			Unknown
Siaya CRH	2010	0.27	12/06/2010	Yes	Negative	Negative	Negative			Discharge alive
Siaya CRH	2010	0.41	12/06/2010	Yes	Negative	Negative	Negative			Discharge alive
Siaya CRH	2010	0.14	12/06/2010	Yes	Positive	Negative	Negative	No	No	Discharge alive
Siaya CRH	2010	0.92	12/06/2010	Yes	Positive	Negative	Positive	No	No	Discharge alive
Mombasa CRH	2010	1.33	13/06/2010	Yes	Negative	Negative	Negative			Discharge alive
Mombasa CRH	2010	1.67	13/06/2010	Yes	Negative	Negative	Negative			Discharge alive
Mombasa CRH	2010	1.25	13/06/2010	Yes	Negative	Negative	Negative			Discharge alive
Nyeri CRH	2010	1.67	13/06/2010	Yes	Negative	Negative	Negative			Unknown
Nyeri CRH	2010	1.33	13/06/2010	Yes	Negative	Negative	Negative			Unknown
Siaya CRH	2010	3.82	13/06/2010	Yes	Negative	Negative	Negative			Discharge alive
Siaya CRH	2010	4.84	13/06/2010	Yes	Negative	Negative	Negative			Discharge alive
Siaya CRH	2010	1.78	14/06/2010	No	Negative	Negative				Discharge alive
Kakamega CRH	2010	6	14/06/2010	Yes	Negative	Negative	Negative			Unknown
Kakamega CRH	2010	1.75	14/06/2010	Yes	Negative	Negative	Negative			Unknown
Nakuru CRH	2010	1.25	14/06/2010	Yes	Negative	Negative	Negative			Discharge alive
Nyeri CRH	2010	0.83	14/06/2010	Yes	Negative	Negative	Negative			Unknown
Nyeri CRH	2010	1.17	14/06/2010	Yes	Negative	Negative	Negative			Discharge alive
Nyeri CRH	2010	42	14/06/2010	Yes	Negative	Negative	Negative			Unknown
Siaya CRH	2010	82	14/06/2010	Yes	Negative	Negative	Negative			Discharge alive
Siaya CRH	2010	0.73	14/06/2010	Yes	Negative	Negative	Negative			Discharge alive
Kakamega CRH	2010	3.5	14/06/2010	Yes	Positive	Negative	Positive	No	Yes	Discharge alive
Nyeri CRH	2010	1.83	14/06/2010	Yes	Positive	Negative	Positive	Yes	No	Unknown
Kakamega CRH	2010	5	15/06/2010	Yes	Negative	Negative	Negative			Unknown
Kenyatta NH	2010	0.5	15/06/2010	Yes	Negative	Negative	Negative			Unknown
Mombasa CRH	2010	2	15/06/2010	Yes	Negative	Negative	Negative			Discharge alive
Nakuru CRH	2010	2.5	15/06/2010	Yes	Negative	Negative	Negative			Unknown
Siaya CRH	2010	55.02	15/06/2010	Yes	Negative	Negative	Negative			Discharge alive
Siaya CRH	2010	11.63	15/06/2010	Yes	Negative	Negative	Negative			Discharge alive
Siaya CRH	2010	6.58	15/06/2010	Yes	Negative	Negative	Negative			Discharge alive
Siaya CRH	2010	3.45	15/06/2010	Yes	Negative	Negative	Negative			Discharge alive
Siaya CRH	2010	0.03	15/06/2010	Yes	Positive	Negative	Positive	No	No	Discharge alive
Mombasa CRH	2010	8	16/06/2010	No						Discharge alive
Kenyatta NH	2010	1.5	16/06/2010	Yes	Negative	Negative	Negative			Unknown
Nakuru CRH	2010	1	16/06/2010	Yes	Negative	Negative	Negative			Unknown
Nakuru CRH	2010	0.5	16/06/2010	Yes	Negative	Negative	Negative			Discharge alive
Nyeri CRH	2010	4	16/06/2010	Yes	Negative	Negative	Negative			Unknown
Siaya CRH	2010	1.31	16/06/2010	Yes	Negative	Negative	Negative			Discharge alive
Siaya CRH	2010	0.14	16/06/2010	Yes	Negative	Negative	Negative			Discharge alive
Siaya CRH	2010	0.62	16/06/2010	Yes	Negative	Negative	Negative			Other
Siaya CRH	2010	10.64	17/06/2010	No	Negative	Negative				Discharge alive
Kakamega CRH	2010	1.25	17/06/2010	Yes	Negative	Negative	Negative			Discharge alive
Nyeri CRH	2010	1	17/06/2010	Yes	Negative	Negative	Negative			Unknown
Nyeri CRH	2010	1.83	17/06/2010	Yes	Negative	Negative	Negative			Discharge alive
Siaya CRH	2010	30.02	17/06/2010	Yes	Negative	Negative	Negative			Discharge alive
Siaya CRH	2010	1.03	17/06/2010	Yes	Negative	Negative	Negative			Discharge alive
Siaya CRH	2010	3.08	17/06/2010	Yes	Negative	Negative	Negative			Discharge alive
Siaya CRH	2010	0.33	17/06/2010	Yes	Negative	Negative	Negative			Discharge alive
Kakamega CRH	2010	3.5	17/06/2010	Yes	Positive	Negative	Positive	No	Yes	Discharge alive
Siaya CRH	2010	90.02	17/06/2010	Yes	Positive	Negative	Positive	No	No	Died
Siaya CRH	2010	7.02	18/06/2010	No	Negative	Negative				Discharge alive
Kakamega CRH	2010	5	18/06/2010	Yes	Negative	Negative	Negative			Discharge alive
Kakamega CRH	2010	2.5	18/06/2010	Yes	Negative	Negative	Negative			Discharge alive
Mombasa CRH	2010	1.67	18/06/2010	Yes	Negative	Negative	Negative			Discharge alive
Mombasa CRH	2010	1.33	18/06/2010	Yes	Negative	Negative	Negative			Discharge alive
Nakuru CRH	2010	1.42	18/06/2010	Yes	Negative	Negative	Negative			Unknown
Nyeri CRH	2010	2.67	18/06/2010	Yes	Negative	Negative	Negative			Unknown
Siaya CRH	2010	35.02	18/06/2010	Yes	Negative	Negative	Negative			Discharge alive
Siaya CRH	2010	1.5	18/06/2010	Yes	Negative	Negative	Negative			Discharge alive
Siaya CRH	2010	3.85	18/06/2010	Yes	Negative	Negative	Negative			Discharge alive
Siaya CRH	2010	0.28	18/06/2010	Yes	Negative	Negative	Negative			Discharge alive
Siaya CRH	2010	0.65	18/06/2010	Yes	Negative	Negative	Negative			Died
Nakuru CRH	2010	1.33	18/06/2010	Yes	Positive	Negative	Positive	No	No	Discharge alive
Nyeri CRH	2010	5.5	18/06/2010	Yes	Positive	Negative	Positive	Yes	No	Unknown
Siaya CRH	2010	0.22	18/06/2010	Yes	Positive	Negative	Positive	No	No	Discharge alive
Siaya CRH	2010	0.58	19/06/2010	No	Negative	Negative				Died
Siaya CRH	2010	0.3	19/06/2010	No	Negative	Negative				Discharge alive
Kakamega CRH	2010	1	19/06/2010	Yes	Negative	Negative	Negative			Discharge alive
Kakamega CRH	2010	4.5	19/06/2010	Yes	Negative	Negative	Negative			Discharge alive
Kakamega CRH	2010	2.42	19/06/2010	Yes	Negative	Negative	Negative			Discharge alive
Kakamega CRH	2010	3	19/06/2010	Yes	Negative	Negative	Negative			Discharge alive
Kenyatta NH	2010	1.17	19/06/2010	Yes	Negative	Negative	Negative			Unknown
Mombasa CRH	2010	1.33	19/06/2010	Yes	Negative	Negative	Negative			Discharge alive
Mombasa CRH	2010	5	19/06/2010	Yes	Negative	Negative	Negative			Discharge alive
Nyeri CRH	2010	2.83	19/06/2010	Yes	Negative	Negative	Negative			Unknown
Siaya CRH	2010	0.57	19/06/2010	Yes	Negative	Negative	Negative			Discharge alive
Siaya CRH	2010	3.4	19/06/2010	Yes	Negative	Negative	Negative			Discharge alive
Siaya CRH	2010	0.14	19/06/2010	Yes	Negative	Negative	Negative			Discharge alive
Siaya CRH	2010	0.73	19/06/2010	Yes	Negative	Negative	Negative			Discharge alive
Siaya CRH	2010	0.14	19/06/2010	Yes	Negative	Negative	Negative			Discharge alive
Siaya CRH	2010	0.28	19/06/2010	Yes	Negative	Negative	Negative			Discharge alive
Siaya CRH	2010	0.29	19/06/2010	Yes	Negative	Negative	Negative			Discharge alive
Siaya CRH	2010	1.99	19/06/2010	Yes	Negative	Negative	Negative			Discharge alive
Siaya CRH	2010	58.05	19/06/2010	Yes	Negative	Negative	Negative			Discharge alive
Nakuru CRH	2010	0.25	19/06/2010	Yes	Positive	Negative	Positive	No	No	Discharge alive
Siaya CRH	2010	0.4	20/06/2010	No	Negative	Negative				Discharge alive
Siaya CRH	2010	0.47	20/06/2010	No	Negative	Negative				Discharge alive
Siaya CRH	2010	10.02	20/06/2010	No	Negative	Negative				Died
Siaya CRH	2010	2.9	20/06/2010	No	Negative	Negative				Discharge alive
Siaya CRH	2010	0.17	20/06/2010	No	Negative	Negative				Other
Kakamega CRH	2010	5.5	20/06/2010	Yes	Negative	Negative	Negative			Discharge alive
Kenyatta NH	2010	1.67	20/06/2010	Yes	Negative	Negative	Negative			Unknown
Mombasa CRH	2010	3.5	20/06/2010	Yes	Negative	Negative	Negative			Discharge alive
Mombasa CRH	2010	1.67	20/06/2010	Yes	Negative	Negative	Negative			Discharge alive
Nyeri CRH	2010	1	20/06/2010	Yes	Negative	Negative	Negative			Unknown
Nyeri CRH	2010	2.33	20/06/2010	Yes	Negative	Negative	Negative			Unknown
Siaya CRH	2010	0.4	20/06/2010	Yes	Negative	Negative	Negative			Discharge alive
Siaya CRH	2010	11.45	20/06/2010	Yes	Negative	Negative	Negative			Discharge alive
Siaya CRH	2010	7.53	20/06/2010	Yes	Negative	Negative	Negative			Discharge alive
Kenyatta NH	2010	0.75	20/06/2010	Yes	Positive	Negative	Positive	No	Yes	Unknown
Siaya CRH	2010	0.36	20/06/2010	Yes	Positive	Negative	Positive	No	No	Discharge alive
Kakamega CRH	2010	3	21/06/2010	Yes	Negative	Negative	Negative			Discharge alive
Kakamega CRH	2010	3	21/06/2010	Yes	Negative	Negative	Negative			Discharge alive
Kakamega CRH	2010	5	21/06/2010	Yes	Negative	Negative	Negative			Discharge alive
Kenyatta NH	2010	0.5	21/06/2010	Yes	Negative	Negative	Negative			Unknown
Nakuru CRH	2010	3.5	21/06/2010	Yes	Negative	Negative	Negative			Discharge alive
Siaya CRH	2010	20.88	21/06/2010	Yes	Negative	Negative	Negative			Discharge alive
Siaya CRH	2010	2.12	21/06/2010	Yes	Negative	Negative	Negative			Died
Siaya CRH	2010	2.45	21/06/2010	Yes	Negative	Negative	Negative			Discharge alive
Siaya CRH	2010	3.19	21/06/2010	Yes	Negative	Negative	Negative			Discharge alive
Siaya CRH	2010	3.19	21/06/2010	Yes	Negative	Negative	Negative			Discharge alive
Siaya CRH	2010	1.16	21/06/2010	Yes	Negative	Negative	Negative			Discharge alive
Siaya CRH	2010	0.46	21/06/2010	Yes	Negative	Negative	Negative			Discharge alive
Siaya CRH	2010	1.6	21/06/2010	Yes	Negative	Negative	Negative			Discharge alive
Nyeri CRH	2010	1.58	21/06/2010	Yes	Positive	Negative	Positive	Yes	No	Discharge alive
Kakamega CRH	2010	4	22/06/2010	Yes	Negative	Negative	Negative			Discharge alive
Kakamega CRH	2010	3.33	22/06/2010	Yes	Negative	Negative	Negative			Discharge alive
Kenyatta NH	2010	1.67	22/06/2010	Yes	Negative	Negative	Negative			Unknown
Mombasa CRH	2010	1.25	22/06/2010	Yes	Negative	Negative	Negative			Discharge alive
Mombasa CRH	2010	0.25	22/06/2010	Yes	Negative	Negative	Negative			Discharge alive
Mombasa CRH	2010	2.5	22/06/2010	Yes	Negative	Negative	Negative			Discharge alive
Mombasa CRH	2010	1.5	22/06/2010	Yes	Negative	Negative	Negative			Discharge alive
Nakuru CRH	2010	1.5	22/06/2010	Yes	Negative	Negative	Negative			Unknown
Nakuru CRH	2010	3	22/06/2010	Yes	Negative	Negative	Negative			Discharge alive
Siaya CRH	2010	20.95	22/06/2010	Yes	Negative	Negative	Negative			Discharge alive
Siaya CRH	2010	2.12	22/06/2010	Yes	Negative	Negative	Negative			Discharge alive
Siaya CRH	2010	8.57	22/06/2010	Yes	Negative	Negative	Negative			Discharge alive
Siaya CRH	2010	0.59	22/06/2010	Yes	Negative	Negative	Negative			Discharge alive
Siaya CRH	2010	0.77	22/06/2010	Yes	Negative	Negative	Negative			Discharge alive
Nyeri CRH	2010	2.67	22/06/2010	Yes	Positive	Negative	Positive	No	No	Unknown
Kakamega CRH	2010	70	23/06/2010	Yes	Negative	Negative	Negative			Discharge alive
Kakamega CRH	2010	64	23/06/2010	Yes	Negative	Negative	Negative			Discharge alive
Kakamega CRH	2010	22	23/06/2010	Yes	Negative	Negative	Negative			Discharge alive
Kenyatta NH	2010	0.33	23/06/2010	Yes	Negative	Negative	Negative			Unknown
Mombasa CRH	2010	0.25	23/06/2010	Yes	Negative	Negative	Negative			Discharge alive
Nyeri CRH	2010	3	23/06/2010	Yes	Negative	Negative	Negative			Unknown
Nyeri CRH	2010	1.83	23/06/2010	Yes	Negative	Negative	Negative			Unknown
Nyeri CRH	2010	3.5	23/06/2010	Yes	Negative	Negative	Negative			Discharge alive
Siaya CRH	2010	2.4	23/06/2010	Yes	Negative	Negative	Negative			Discharge alive
Siaya CRH	2010	0.8	23/06/2010	Yes	Negative	Negative	Negative			Discharge alive
Siaya CRH	2010	1.84	23/06/2010	Yes	Negative	Negative	Negative			Discharge alive
Kakamega CRH	2010	3	23/06/2010	Yes	Positive	Negative	Positive	No	Yes	Discharge alive
Kakamega CRH	2010	2.33	24/06/2010	Yes	Negative	Negative	Negative			Discharge alive
Kakamega CRH	2010	2	24/06/2010	Yes	Negative	Negative	Negative			Discharge alive
Nakuru CRH	2010	2	24/06/2010	Yes	Negative	Negative	Negative			Discharge alive
Nakuru CRH	2010	1.25	24/06/2010	Yes	Negative	Negative	Negative			Discharge alive
Nakuru CRH	2010	1.83	24/06/2010	Yes	Negative	Negative	Negative			Discharge alive
Siaya CRH	2010	0.31	24/06/2010	Yes	Negative	Negative	Negative			Discharge alive
Siaya CRH	2010	8.21	24/06/2010	Yes	Negative	Negative	Negative			Discharge alive
Siaya CRH	2010	1.26	24/06/2010	Yes	Negative	Negative	Negative			Discharge alive
Siaya CRH	2010	0.5	24/06/2010	Yes	Negative	Negative	Negative			Discharge alive
Kakamega CRH	2010	1.5	25/06/2010	Yes	Negative	Negative	Negative			Discharge alive
Mombasa CRH	2010	5.83	25/06/2010	Yes	Negative	Negative	Negative			Discharge alive
Mombasa CRH	2010	0.33	25/06/2010	Yes	Negative	Negative	Negative			Discharge alive
Nakuru CRH	2010	0.83	25/06/2010	Yes	Negative	Negative	Negative			Discharge alive
Nyeri CRH	2010	0.25	25/06/2010	Yes	Negative	Negative	Negative			Unknown
Nyeri CRH	2010	1.33	25/06/2010	Yes	Negative	Negative	Negative			Discharge alive
Nyeri CRH	2010	1.67	25/06/2010	Yes	Negative	Negative	Negative			Unknown
Siaya CRH	2010	18.03	25/06/2010	Yes	Negative	Negative	Negative			Discharge alive
Siaya CRH	2010	1.43	25/06/2010	Yes	Negative	Negative	Negative			Discharge alive
Siaya CRH	2010	1.64	25/06/2010	Yes	Negative	Negative	Negative			Discharge alive
Siaya CRH	2010	2.96	25/06/2010	Yes	Negative	Negative	Negative			Died
Siaya CRH	2010	2.11	25/06/2010	Yes	Negative	Negative	Negative			Discharge alive
Siaya CRH	2010	3.04	25/06/2010	Yes	Negative	Negative	Negative			Discharge alive
Siaya CRH	2010	0.31	25/06/2010	Yes	Negative	Positive	Positive			Discharge alive
Kenyatta NH	2010	0.75	25/06/2010	Yes	Positive	Negative	Positive	No	No	Unknown
Siaya CRH	2010	0.92	26/06/2010	No	Negative	Negative				Discharge alive
Siaya CRH	2010	6.77	26/06/2010	No	Negative	Negative				Discharge alive
Kakamega CRH	2010	4	26/06/2010	Yes	Negative	Negative	Negative			Discharge alive
Mombasa CRH	2010	1.17	26/06/2010	Yes	Negative	Negative	Negative			Discharge alive
Mombasa CRH	2010	2.5	26/06/2010	Yes	Negative	Negative	Negative			Discharge alive
Mombasa CRH	2010	1.33	26/06/2010	Yes	Negative	Positive	Positive			Discharge alive
Mombasa CRH	2010	1.17	26/06/2010	Yes	Negative	Negative	Negative			Discharge alive
Nakuru CRH	2010	11	26/06/2010	Yes	Negative	Negative	Negative			Discharge alive
Nakuru CRH	2010	1	26/06/2010	Yes	Negative	Negative	Negative			Discharge alive
Nakuru CRH	2010	0.67	26/06/2010	Yes	Negative	Negative	Negative			Unknown
Siaya CRH	2010	1.2	26/06/2010	Yes	Negative	Negative	Negative			Discharge alive
Siaya CRH	2010	1.95	26/06/2010	Yes	Negative	Negative	Negative			Discharge alive
Siaya CRH	2010	0.16	26/06/2010	Yes	Negative	Negative	Negative			Discharge alive
Siaya CRH	2010	0.61	26/06/2010	Yes	Negative	Negative	Negative			Discharge alive
Siaya CRH	2010	0.28	26/06/2010	Yes	Negative	Negative	Negative			Discharge alive
Siaya CRH	2010	1.71	27/06/2010	No	Negative	Negative				Discharge alive
Siaya CRH	2010	2.57	27/06/2010	No	Negative	Negative				Discharge alive
Kakamega CRH	2010	21	27/06/2010	Yes	Negative	Negative	Negative			Discharge alive
Kakamega CRH	2010	6	27/06/2010	Yes	Negative	Negative	Negative			Discharge alive
Kakamega CRH	2010	73	27/06/2010	Yes	Negative	Negative	Negative			Discharge alive
Kenyatta NH	2010	0.75	27/06/2010	Yes	Negative	Negative	Negative			Unknown
Mombasa CRH	2010	1.83	27/06/2010	Yes	Negative	Negative	Negative			Discharge alive
Mombasa CRH	2010	1.67	27/06/2010	Yes	Negative	Negative	Negative			Discharge alive
Mombasa CRH	2010	2	27/06/2010	Yes	Negative	Negative	Negative			Discharge alive
Nakuru CRH	2010	1.92	27/06/2010	Yes	Negative	Negative	Negative			Discharge alive
Nakuru CRH	2010	0.67	27/06/2010	Yes	Negative	Negative	Negative			Unknown
Nakuru CRH	2010	1	27/06/2010	Yes	Negative	Negative	Negative			Discharge alive
Nyeri CRH	2010	0.83	27/06/2010	Yes	Negative	Negative	Negative			Discharge alive
Siaya CRH	2010	0.54	27/06/2010	Yes	Negative	Negative	Negative			Discharge alive
Siaya CRH	2010	0.21	27/06/2010	Yes	Negative	Positive	Positive			Discharge alive
Siaya CRH	2010	0.27	27/06/2010	Yes	Negative	Negative	Negative			Discharge alive
Siaya CRH	2010	0.32	27/06/2010	Yes	Negative	Negative	Negative			Discharge alive
Siaya CRH	2010	1.37	27/06/2010	Yes	Negative	Negative	Negative			Discharge alive
Siaya CRH	2010	1.74	27/06/2010	Yes	Negative	Negative	Negative			Discharge alive
Siaya CRH	2010	42.05	27/06/2010	Yes	Negative	Negative	Negative			Discharge alive
Kakamega CRH	2010	5	28/06/2010	Yes	Negative	Negative	Negative			Discharge alive
Kakamega CRH	2010	3.5	28/06/2010	Yes	Negative	Negative	Negative			Discharge alive
Mombasa CRH	2010	3	28/06/2010	Yes	Negative	Negative	Negative			Discharge alive
Nakuru CRH	2010	0.67	28/06/2010	Yes	Negative	Negative	Negative			Unknown
Nakuru CRH	2010	0.83	28/06/2010	Yes	Negative	Negative	Negative			Discharge alive
Nakuru CRH	2010	0.75	28/06/2010	Yes	Negative	Negative	Negative			Unknown
Nyeri CRH	2010	0.5	28/06/2010	Yes	Negative	Negative	Negative			Unknown
Siaya CRH	2010	2.15	28/06/2010	Yes	Negative	Positive	Positive			Discharge alive
Siaya CRH	2010	0.85	28/06/2010	Yes	Negative	Negative	Negative			Discharge alive
Siaya CRH	2010	0.93	28/06/2010	Yes	Negative	Negative	Negative			Discharge alive
Kenyatta NH	2010	1.58	28/06/2010	Yes	Positive	Negative	Positive	No	Yes	Unknown
Nyeri CRH	2010	1.83	28/06/2010	Yes	Positive	Negative	Positive	Yes	No	Unknown
Nakuru CRH	2010	0.25	29/06/2010	No						Died
Kakamega CRH	2010	30	29/06/2010	Yes	Negative	Negative	Negative			Discharge alive
[truncated: 27,003 more rows]
